# Supplementary material for: Pd-catalysed, Ag-assisted C2–H alkenylation of benzophospholes
Source: Royal Society of Chemistry journal article supplement (doi:10.1039/d2cc04942b), 2022-01-01
Supplement: d2cc04942b1.pdf [file d2cc04942b1.pdf]

## Supplementary Information

### Pd-catalysed, Ag-assisted C2–H alkenylation of benzophospholes

Yu Tokura,<sup>†</sup> Shibo Xu,<sup>‡</sup> Yuki Kojima,<sup>†</sup> Masahiro Miura<sup>‡</sup> and Koji Hirano<sup>\*,†,‡</sup>

<sup>†</sup>*Department of Applied Chemistry, Graduate School of Engineering, Osaka University, Suita, Osaka 565-0871, Japan*

<sup>‡</sup>*Innovative Catalysis Science Division, Institute for Open and Transdisciplinary Research Initiatives (ICS-OTRI), Osaka University, Suita, Osaka 565-0871, Japan*

*E-mail: k\_hirano@chem.eng.osaka-u.ac.jp (K.H.)*

## Contents

|                                           |         |
|-------------------------------------------|---------|
| <b>Instrumentation and Chemicals</b>      | S2      |
| <b>Experimental Procedures</b>            | S3–S4   |
| <b>X-Ray Analysis</b>                     | S5–S6   |
| <b>Detailed Optimization Studies</b>      | S7–S9   |
| <b>Control Experiments</b>                | S11     |
| <b>Optical Properties of Products</b>     | S12     |
| <b>DFT Calculations</b>                   | S12–S15 |
| <b>Characterization Data for Products</b> | S16–S78 |
| <b>References</b>                         | S79     |

### Instrumentation and Chemicals

$^1\text{H}$ ,  $^{13}\text{C}\{^1\text{H}\}$ ,  $^{19}\text{F}\{^1\text{H}\}$ , and  $^{31}\text{P}\{^1\text{H}\}$  NMR spectra were recorded at 400 MHz, 100 MHz, 376 MHz, and 162 MHz, respectively, for  $\text{CDCl}_3$  solutions. HRMS data were obtained by APCI using TOF. GC analysis was carried out using a silicon OV-17 column (i. d. 2.6 mm x 1.5 m) or a CBP-1 capillary column (i. d. 0.5 mm x 25 m). TLC analyses were performed on commercial glass plates bearing a 0.25 mm layer of Merck silica gel 60F<sub>254</sub>. Silica gel (60 N, spherical neutral, Kanto Chemical Co.) was used for column chromatography. Gel permeation chromatography (GPC) was performed by LC-20AR (pump, SHIMADZU, 7.5 mL/min  $\text{CHCl}_3$ ) and SPD-20A (UV detector, SHIMADZU, 254 nm) with two in-line YMC-GPC T2000 (20 x 600 mm, particle size: 10  $\mu\text{m}$ ) (preparative columns, YMC). UV-vis spectra were acquired with JASCO V-750 spectrometer. Photoluminescence spectra and quantum yield measurements were conducted with JASCO FP-8500 spectrometer equipped with an integration sphere system. The crystal measurement was performed with XtaLAB Synergy-S/Mo or Cu (Rigaku).

Unless otherwise noted, materials obtained from commercial suppliers were used without further purification. 1,4-Dioxane was dried on a Glass Contour Solvent dispensing system (Nikko Hansen & Co., Ltd.) prior to use.  $\text{Pd}(\text{OAc})_2$ ,  $\text{AgTFA}$ , and  $\text{NaHCO}_3$  were purchased from FUJIFILM Wako Pure Chemical Co. The C2-H benzophospholes **1** were prepared from the corresponding 1,1-diarylethenes and phenylphosphinic acid according to the literature method.<sup>S1</sup>

## Experimental Procedures

### Pd-Catalysed C2-H Alkenylation of Benzophospholes (Scheme 2)

A 0.10 mmol scale synthesis of **3aa**: 1,3-Diphenylbenzophosphole oxide (**1a**; 30 mg, 0.10 mmol), Pd(OAc)<sub>2</sub> (2.3 mg, 0.010 mmol), AgTFA (44 mg, 0.20 mmol), NaHCO<sub>3</sub> (16 mg, 0.20 mmol), and 1,4-dioxane (1.0 mL) were placed in a 15 mL screw cap test tube, and styrene (**2a**; 21 mg, 0.20 mmol) was finally added. The tube was sealed with a cap and heated at 110 °C for 20 h (oil bath). The resulting mixture was cooled to room temperature and then quenched with water and brine. Extraction with ethyl acetate three times, filtration through a short pad of Na<sub>2</sub>SO<sub>4</sub>, and evaporation under reduced pressure formed a crude material. Triethyl phosphate (10 mg) was added as an internal standard, and the resulting mixture was analyzed by <sup>1</sup>H and <sup>31</sup>P{<sup>1</sup>H} NMR in CDCl<sub>3</sub> solution. The conversion of **1a** was estimated to be 90% by comparison with integrated intensity of triethyl phosphate. After the above NMR analysis, the volatiles were evaporated, and residue was purified by column chromatography on silica gel with hexane/ethyl acetate (1:2, v/v) then GPC (CHCl<sub>3</sub>) to give (*E*)-1,3-Diphenyl-2-styrylphosphindole 1-oxide (**3aa**; 35 mg, 0.086 mmol) in 85% yield.

A 1.0 mmol scale synthesis of **3aa**: 1,3-Diphenylbenzophosphole oxide (**1a**; 303 mg, 1.0 mmol), Pd(OAc)<sub>2</sub> (23 mg, 0.10 mmol), AgTFA (443 mg, 2.0 mmol), NaHCO<sub>3</sub> (169 mg, 2.0 mmol), and 1,4-dioxane (10 mL) were placed in a 100 mL screw cap test tube, and styrene (**2a**; 208 mg, 2.0 mmol) was finally added. The tube was sealed with a cap and heated at 110 °C for 20 h (oil bath). The resulting mixture was cooled to room temperature and then quenched with water and brine. Extraction with ethyl acetate three times, filtration through a short pad of Na<sub>2</sub>SO<sub>4</sub>, and evaporation under reduced pressure formed a crude material. The residue was purified by column chromatography on silica gel with MeOH then GPC (CHCl<sub>3</sub>) to give (*E*)-1,3-Diphenyl-2-styrylphosphindole 1-oxide (**3aa**; 262 mg, 0.65 mmol) in 65% yield.

A 0.050 mmol scale synthesis of **3am**: 1,3-Diphenylbenzophosphole oxide (**1a**; 30 mg, 0.10 mmol), Pd(OAc)<sub>2</sub> (2.3 mg, 0.010 mmol), AgTFA (44 mg, 0.20 mmol), NaHCO<sub>3</sub> (16 mg, 0.20 mmol), and 1,4-dioxane (1.0 mL) were placed in a 15 mL screw cap test tube, and 1,4-di(vinyl)benzene (**2m**; 6.8 mg, 0.050 mmol) was finally added. The tube was sealed with a cap and heated at 110 °C for 20 h (oil bath). The resulting mixture was cooled to room temperature and then quenched with water and brine. Extraction with ethyl acetate three times, filtration through a short pad of Na<sub>2</sub>SO<sub>4</sub>, and evaporation

under reduced pressure formed a crude material. The residue was purified by column chromatography on silica gel with hexane/ethyl acetate (1:2, v/v) then GPC (CHCl<sub>3</sub>) to give 2,2'-((1*E*,1'*E*)-1,4-phenylenebis(ethene-2,1-diyl))bis(1,3-diphenylphosphindole 1-oxide) (**3am**; 18 mg, 0.024 mmol) in 47% yield.

A 0.10 mmol scale synthesis of **3an**: 1,3-Diphenylbenzophosphole oxide (**1a**; 30 mg, 0.10 mmol), Pd(OAc)<sub>2</sub> (4.8 mg, 0.020 mmol), AgTFA (66 mg, 0.30 mmol), NaHCO<sub>3</sub> (17 mg, 0.20 mmol), and 1,4-dioxane (1.0 mL) were placed in a 15 mL screw cap test tube, and methyl vinyl ketone (**2n**; 14.5 mg, 0.20 mmol) was finally added. The tube was sealed with a cap and heated at 110 °C for 20 h (oil bath). The resulting mixture was cooled to room temperature and then quenched with water and brine. Extraction with ethyl acetate three times, filtration through a short pad of Na<sub>2</sub>SO<sub>4</sub>, and evaporation under reduced pressure formed a crude material. The residue was purified by GPC (CHCl<sub>3</sub>) to give (*E*)-4-(1-oxido-1,3-diphenylphosphindol-2-yl)but-3-en-2-one (**3an**; 26 mg, 0.071 mmol) in 71% yield.



## X-Ray Analysis

The single X-ray quality crystals of **3al** were grown from hexane/CHCl<sub>3</sub> by slow evaporation at room temperature. The structure was refined by full-matrix least-squares method using SHELXL-2017/1.

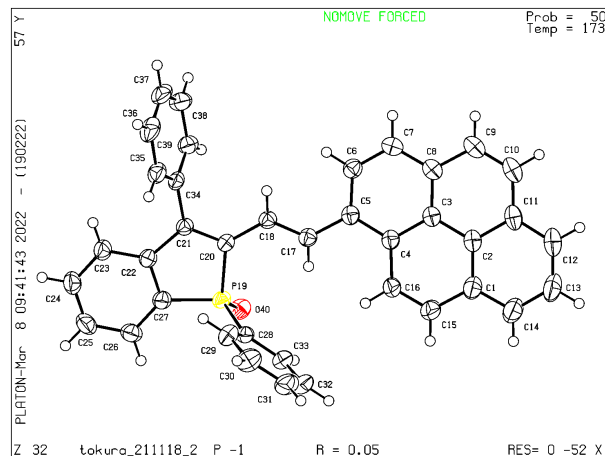

**Figure S1.** ORTEP drawing of **3al** (CCDC 2180994, 50% thermal probability).

**Table S1.** Crystal data for **3al**

|                               |             |
|-------------------------------|-------------|
| Crystal system                | triclinic   |
| Space group IT number         | 2           |
| Space group name H-M alt      | P -1        |
| Space group name Hall         | -P 1        |
| Cell length a                 | 8.4130(3)   |
| Cell length b                 | 10.9151(5)  |
| Cell length c                 | 16.0946(7)  |
| Cell angle alpha              | 81.509(4)   |
| Cell angle beta               | 81.007(3)   |
| Cell angle gamma              | 86.633(4)   |
| Cell volume                   | 1442.82(11) |
| Cell formula units Z          | 2           |
| Refine ls R factor all        | 0.0645      |
| Refine ls R factor gt         | 0.0461      |
| Refine ls wR factor gt        | 0.1152      |
| Refine ls wR factor ref       | 0.1241      |
| Refine ls goodness of fit ref | 1.085       |

The single X-ray quality crystals of **3aq** were grown from hexane/CHCl<sub>3</sub> by slow evaporation at room temperature. The structure was refined by full-matrix least-squares method using SHELXL-2017/1.

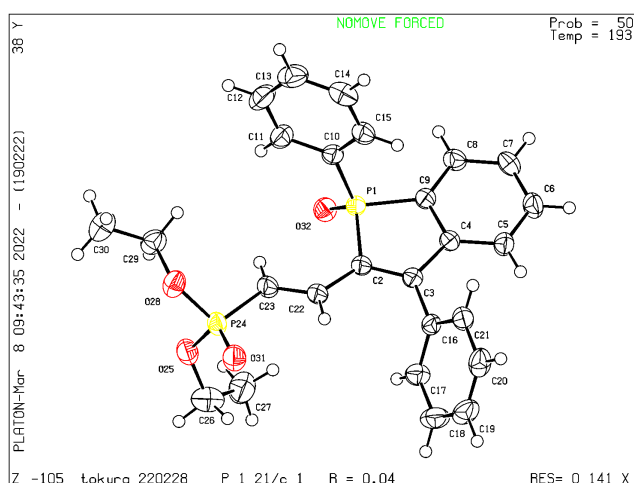

**Figure S2.** ORTEP drawing of **3aq** (CCDC 2180995, 50% thermal probability).

**Table S2.** Crystal data for **3aq**

|                               |            |
|-------------------------------|------------|
| Crystal system                | monoclinic |
| Space group IT number         | 14         |
| Space group name H-M alt      | P 1 21/c 1 |
| Space group name Hall         | -P 2ybc    |
| Cell length a                 | 8.7292(2)  |
| Cell length b                 | 12.4540(2) |
| Cell length c                 | 21.6161(3) |
| Cell angle alpha              | 90         |
| Cell angle beta               | 92.026(2)  |
| Cell angle gamma              | 90         |
| Cell volume                   | 2348.49(7) |
| Cell formula units Z          | 4          |
| Refine ls R factor all        | 0.0448     |
| Refine ls R factor gt         | 0.0403     |
| Refine ls wR factor gt        | 0.1116     |
| Refine ls wR factor ref       | 0.1157     |
| Refine ls goodness of fit ref | 1.097      |

## Detailed Optimization Studies

**Table S3.** Pd-Catalysed C2–H Alkenylation of **1a** with **2a**: Initial Screening under N<sub>2</sub>.<sup>[a]</sup>

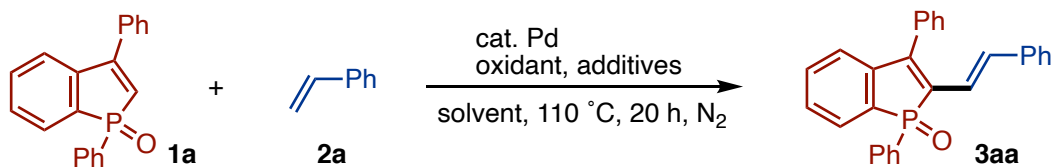

| entry                   | Pd                         | oxidant                         | additives (equiv)     | solvent          | <b>1a:3aa</b> <sup>[b]</sup> |
|-------------------------|----------------------------|---------------------------------|-----------------------|------------------|------------------------------|
| 1                       | Pd(OAc) <sub>2</sub>       | AgTFA                           | phenanthroline (0.15) | toluene          | 100:0                        |
| 2                       | <b>Pd(OAc)<sub>2</sub></b> | <b>AgTFA</b>                    | <b>none</b>           | <b>toluene</b>   | <b>53:57</b>                 |
| 3                       | Pd(OPiv) <sub>2</sub>      | AgTFA                           | none                  | toluene          | 45:55                        |
| 4                       | Pd(TFA) <sub>2</sub>       | AgTFA                           | none                  | toluene          | 50:50                        |
| 5                       | Pd(OAc) <sub>2</sub>       | AgOAc                           | none                  | toluene          | 69:31                        |
| 6                       | Pd(OAc) <sub>2</sub>       | Ag <sub>2</sub> CO <sub>3</sub> | none                  | toluene          | 97:3                         |
| 7                       | Pd(OAc) <sub>2</sub>       | Ag <sub>2</sub> O               | none                  | toluene          | 95:5                         |
| 8                       | Pd(OAc) <sub>2</sub>       | Ag <sub>3</sub> PO <sub>4</sub> | none                  | toluene          | 100:0                        |
| 9                       | Pd(OAc) <sub>2</sub>       | AgNO <sub>3</sub>               | none                  | toluene          | 90:10                        |
| 10                      | Pd(OAc) <sub>2</sub>       | Cu(OAc) <sub>2</sub>            | none                  | toluene          | 92:8                         |
| 11                      | Pd(OAc) <sub>2</sub>       | Cu(TFA) <sub>2</sub>            | none                  | toluene          | 95:5                         |
| 12                      | Pd(OAc) <sub>2</sub>       | AgTFA                           | none                  | MeCN             | 95:5                         |
| 13                      | Pd(OAc) <sub>2</sub>       | AgTFA                           | none                  | DMSO             | 100:0                        |
| 14                      | Pd(OAc) <sub>2</sub>       | AgTFA                           | none                  | DMF              | 95:5                         |
| 15                      | Pd(OAc) <sub>2</sub>       | AgTFA                           | none                  | PivOH            | 55:45                        |
| 16 <sup>[c]</sup>       | Pd(OAc) <sub>2</sub>       | AgTFA                           | none                  | HFIP             | 100:0                        |
| 17 <sup>[d]</sup>       | Pd(OAc) <sub>2</sub>       | AgTFA                           | none                  | <i>o</i> -xylene | 78:22                        |
| 18                      | Pd(OAc) <sub>2</sub>       | AgTFA                           | pyridine (1.0)        | toluene          | 88:12                        |
| 19                      | Pd(OAc) <sub>2</sub>       | AgTFA                           | PivOH (1.0)           | toluene          | 64:36                        |
| 20                      | Pd(OAc) <sub>2</sub>       | AgTFA                           | CsOPiv (1.0)          | toluene          | 60:40                        |
| <b>21<sup>[e]</sup></b> | <b>Pd(OAc)<sub>2</sub></b> | <b>AgTFA</b>                    | <b>none</b>           | <b>toluene</b>   | <b>37:63</b>                 |

[a] Reaction conditions: Pd (0.010 mmol), oxidant (0.20 mmol), additives, **1a** (0.10 mmol), **2a** (0.50 mmol), solvent (1.0 mL), 110 °C, 20 h, N<sub>2</sub>. [b] Ratios of **1a:3aa** estimated by <sup>1</sup>H and <sup>31</sup>P{<sup>1</sup>H} NMR with P(O)(OEt)<sub>3</sub> as the internal standard. [c] At 50 °C. [d] At 140 °C. [e] With **2a** (0.20 mmol).

**Table S4.** Pd-Catalysed C2–H Alkenylation of **1a** with **2a**: Screening under Air.<sup>[a]</sup>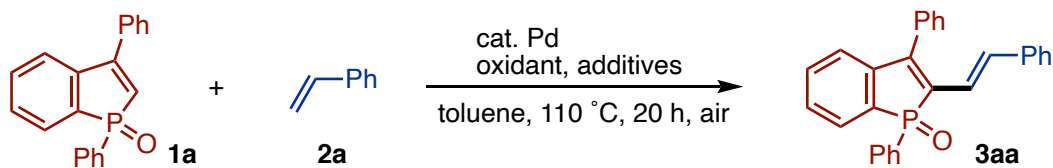

| entry    | Pd                                | oxidant             | additives (equiv)          | <b>1a:3aa</b> <sup>[b]</sup> |
|----------|-----------------------------------|---------------------|----------------------------|------------------------------|
| <b>1</b> | <b><i>Pd(OAc)<sub>2</sub></i></b> | <b><i>AgTFA</i></b> | <b><i>none</i></b>         | <b><i>37:63</i></b>          |
| 2        | Pd(OPiv) <sub>2</sub>             | AgTFA               | none                       | 38:62                        |
| 3        | Pd(OAc) <sub>2</sub>              | AgBF <sub>4</sub>   | none                       | 100:0                        |
| 4        | Pd(OAc) <sub>2</sub>              | AgOTf               | none                       | 100:0                        |
| 5        | Pd(OAc) <sub>2</sub>              | AgPF <sub>6</sub>   | none                       | 97:3                         |
| 6        | Pd(OAc) <sub>2</sub>              | AgTFA               | CF <sub>3</sub> COOH (1.0) | 38:62                        |
| 7        | Pd(OAc) <sub>2</sub>              | AgTFA               | Cy <sub>3</sub> P=O (0.10) | 38:62                        |

[a] Reaction conditions: Pd (0.010 mmol), oxidant (0.20 mmol), additives, **1a** (0.10 mmol), **2a** (0.20 mmol), toluene (1.0 mL), 110 °C, 20 h, air. [b] Ratios of **1a:3aa** estimated by <sup>1</sup>H and <sup>31</sup>P{<sup>1</sup>H} NMR with P(O)(OEt)<sub>3</sub> as the internal standard.

**Table S5.** Pd-Catalysed C2–H Alkenylation of **1a** with **2a**: Base Screening and Reinvestigation of Solvent.<sup>[a]</sup>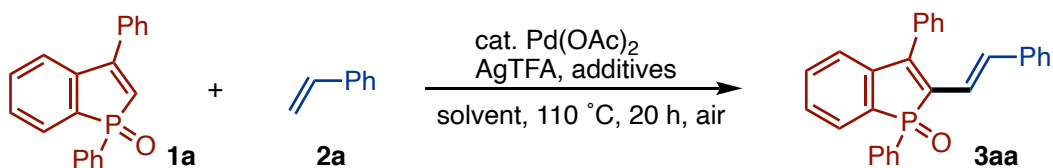

| entry    | additives (equiv)                     | solvent               | <b>1a:3aa</b> <sup>[b]</sup> |
|----------|---------------------------------------|-----------------------|------------------------------|
| 1        | MgO (2.0)                             | toluene               | 35:65                        |
| 2        | Li <sub>2</sub> CO <sub>3</sub> (2.0) | toluene               | 24:76                        |
| 3        | Na <sub>2</sub> CO <sub>3</sub> (2.0) | toluene               | 23:77                        |
| 4        | K <sub>2</sub> CO <sub>3</sub> (2.0)  | toluene               | 34:66                        |
| 5        | Cs <sub>2</sub> CO <sub>3</sub> (2.0) | toluene               | 88:12                        |
| <b>6</b> | <b><i>NaHCO<sub>3</sub></i> (2.0)</b> | <b><i>toluene</i></b> | <b><i>21:79</i></b>          |
| 7        | KHCO <sub>3</sub> (2.0)               | toluene               | 34:66                        |
| 8        | K <sub>3</sub> PO <sub>4</sub> (2.0)  | toluene               | 21:79                        |
| 9        | K <sub>2</sub> HPO <sub>4</sub> (2.0) | toluene               | 62:38                        |

|                   |                                                      |                             |                    |
|-------------------|------------------------------------------------------|-----------------------------|--------------------|
| 10                | K <sub>4</sub> P <sub>2</sub> O <sub>7</sub> (2.0)   | toluene                     | 85:15              |
| 11                | LiOAc (2.0)                                          | toluene                     | 28:72              |
| 12                | NaOAc (2.0)                                          | toluene                     | 31:69              |
| 13                | KOAc (2.0)                                           | toluene                     | 35:65              |
| 14                | CsOAc (2.0)                                          | toluene                     | 46:54              |
| <b>15</b>         | <b>none</b>                                          | <b>1,4-dioxane</b>          | <b>22:78</b>       |
| 16                | none                                                 | THF                         | 41:59              |
| 17                | none                                                 | <i>i</i> -Pr <sub>2</sub> O | 28:72              |
| <b>18</b>         | <b>none</b>                                          | <b>CPME</b>                 | <b>26:74</b>       |
| <b>19</b>         | <b>none</b>                                          | <b>MTBE</b>                 | <b>18:82</b>       |
| 20                | none                                                 | AcOH                        | 61:39              |
| <b>21</b>         | <b>NaHCO<sub>3</sub> (2.0)</b>                       | <b>1,4-dioxane</b>          | <b>10:90 (85%)</b> |
| 22                | NaHCO <sub>3</sub> (2.0)                             | CPME                        | 23:77              |
| 23                | NaHCO <sub>3</sub> (2.0)                             | MTBE                        | 9:91               |
| 24                | NaHCO <sub>3</sub> (2.0), Cy <sub>3</sub> P=O (0.10) | 1,4-dioxane                 | 11:89              |
| 25                | NaHCO <sub>3</sub> (2.0), Ph <sub>3</sub> P (0.20)   | 1,4-dioxane                 | 64:46              |
| 26                | NaHCO <sub>3</sub> (2.0), phenanthroline (0.10)      | 1,4-dioxane                 | 44:56              |
| 27 <sup>[c]</sup> | NaHCO <sub>3</sub> (2.0)                             | 1,4-dioxane                 | 14:86              |
| 28 <sup>[d]</sup> | NaHCO <sub>3</sub> (2.0)                             | 1,4-dioxane                 | 8:92               |
| 29 <sup>[e]</sup> | NaHCO <sub>3</sub> (2.0)                             | 1,4-dioxane                 | 13:87              |
| 30 <sup>[f]</sup> | NaHCO <sub>3</sub> (2.0)                             | 1,4-dioxane                 | 100:0              |
| 31 <sup>[g]</sup> | NaHCO <sub>3</sub> (2.0)                             | 1,4-dioxane                 | 98:2               |

[a] Reaction conditions: Pd(OAc)<sub>2</sub> (0.010 mmol), AgTFA (0.20 mmol), additives, **1a** (0.10 mmol), **2a** (0.20 mmol), solvent (1.0 mL), 110 °C, 20 h, air. [b] Ratios of **1a:3aa** estimated by <sup>1</sup>H and <sup>31</sup>P{<sup>1</sup>H} NMR with P(O)(OEt)<sub>3</sub> as the internal standard. Isolated yield of **3aa** is in parentheses. [c] With Pd(OAc)<sub>2</sub> (0.0050 mmol). [d] With Pd(OAc)<sub>2</sub> (0.015 mmol). [e] With **2a** (0.30 mmol). [f] Without Pd(OAc)<sub>2</sub>. [g] With benzoquinone instead of AgTFA.

## Control Experiments

**Table S6.** H/D Exchange Reaction of **1a**.<sup>[a]</sup>

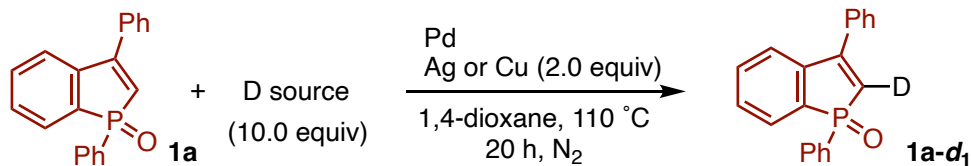

| entry | D source                           | Pd (mol %)                 | Ag or Cu                        | % D of <b>1a-d<sub>1</sub></b> <sup>[b]</sup> |
|-------|------------------------------------|----------------------------|---------------------------------|-----------------------------------------------|
| 1     | acetic acid- <i>d</i> <sub>4</sub> | Pd(OAc) <sub>2</sub> (10)  | AgTFA                           | 70                                            |
| 2     | acetic acid- <i>d</i> <sub>4</sub> | Pd(OAc) <sub>2</sub> (10)  | none                            | 0                                             |
| 3     | acetic acid- <i>d</i> <sub>4</sub> | Pd(OAc) <sub>2</sub> (100) | none                            | 37                                            |
| 4     | acetic acid- <i>d</i> <sub>4</sub> | Pd(TFA) <sub>2</sub> (10)  | none                            | 0                                             |
| 5     | acetic acid- <i>d</i> <sub>4</sub> | Pd(TFA) <sub>2</sub> (100) | none                            | 0                                             |
| 6     | acetic acid- <i>d</i> <sub>4</sub> | none                       | AgTFA                           | 64                                            |
| 7     | acetic acid- <i>d</i> <sub>4</sub> | none                       | AgOAc                           | 12                                            |
| 8     | acetic acid- <i>d</i> <sub>4</sub> | none                       | Ag <sub>2</sub> CO <sub>3</sub> | 21                                            |
| 9     | acetic acid- <i>d</i> <sub>4</sub> | none                       | AgOTf                           | 10                                            |
| 10    | acetic acid- <i>d</i> <sub>4</sub> | none                       | Cu(OAc) <sub>2</sub>            | 0                                             |
| 11    | D <sub>2</sub> O                   | none                       | AgTFA                           | 87                                            |
| 12    | D <sub>2</sub> O                   | none                       | AgOAc                           | 14                                            |

[a] Reaction conditions: Pd, Ag or Cu (0.20 mmol), D source (1.0 mmol), **1a** (0.10 mmol), 1,4-dioxane (1.0 mL), 110 °C, 20 h, N<sub>2</sub>. [b] Estimated by <sup>1</sup>H and <sup>2</sup>H NMR analysis.

## Optical Properties of Products

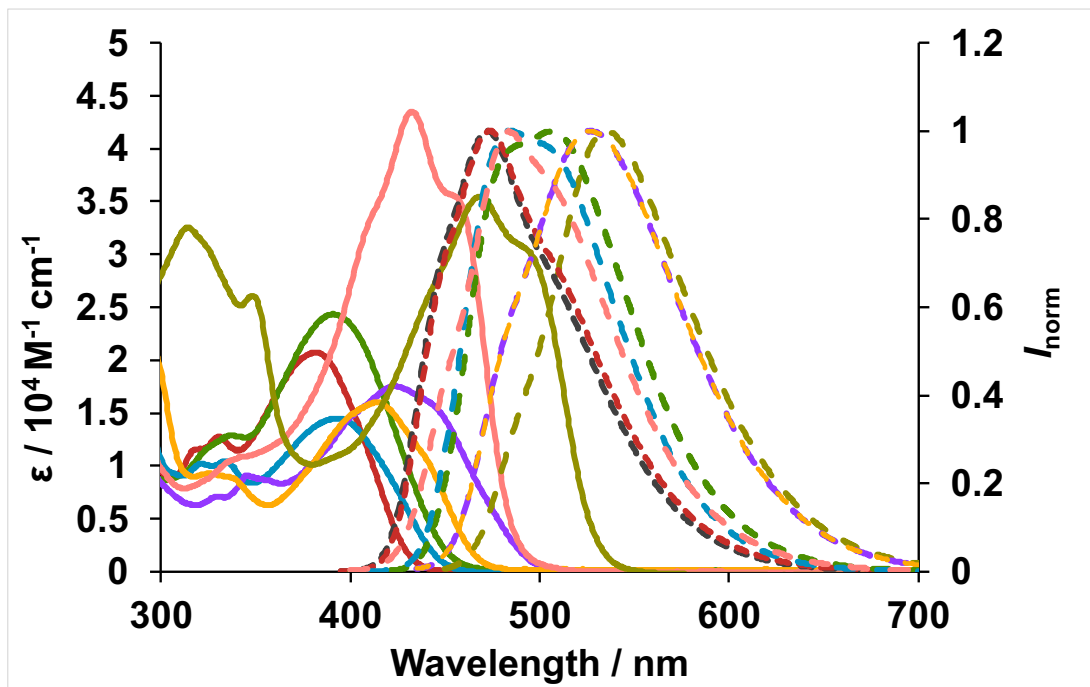

**Figure S3.** UV-vis absorption (solid line) and emission (dotted line) spectra of **3aa**, **3ac**, **3ae**, **3ak**, **3al**, **3ga**, **3am**, and **3hm** ( $1.0 \times 10^{-5}$  M in  $\text{CH}_2\text{Cl}_2$ ). Excited at the absorption maxima for the emission spectrum.

**Table S7.** Optical properties for selected compounds.

| compd      | $\lambda_{\text{abs}}$ (nm) | $\lambda_{\text{em}}$ (nm) | $\Phi_{\text{F}}$ |
|------------|-----------------------------|----------------------------|-------------------|
| <b>3aa</b> | 380                         | 473                        | 0.82              |
| <b>3ac</b> | 382                         | 474                        | 0.82              |
| <b>3ae</b> | 394                         | 485                        | 0.78              |
| <b>3ak</b> | 382                         | 506                        | 0.56              |
| <b>3al</b> | 423                         | 535                        | 0.81              |
| <b>3ga</b> | 415                         | 527                        | 0.52              |
| <b>3am</b> | 432                         | 510                        | 0.14              |
| <b>3hm</b> | 468                         | 536                        | 0.05              |

## DFT Calculations

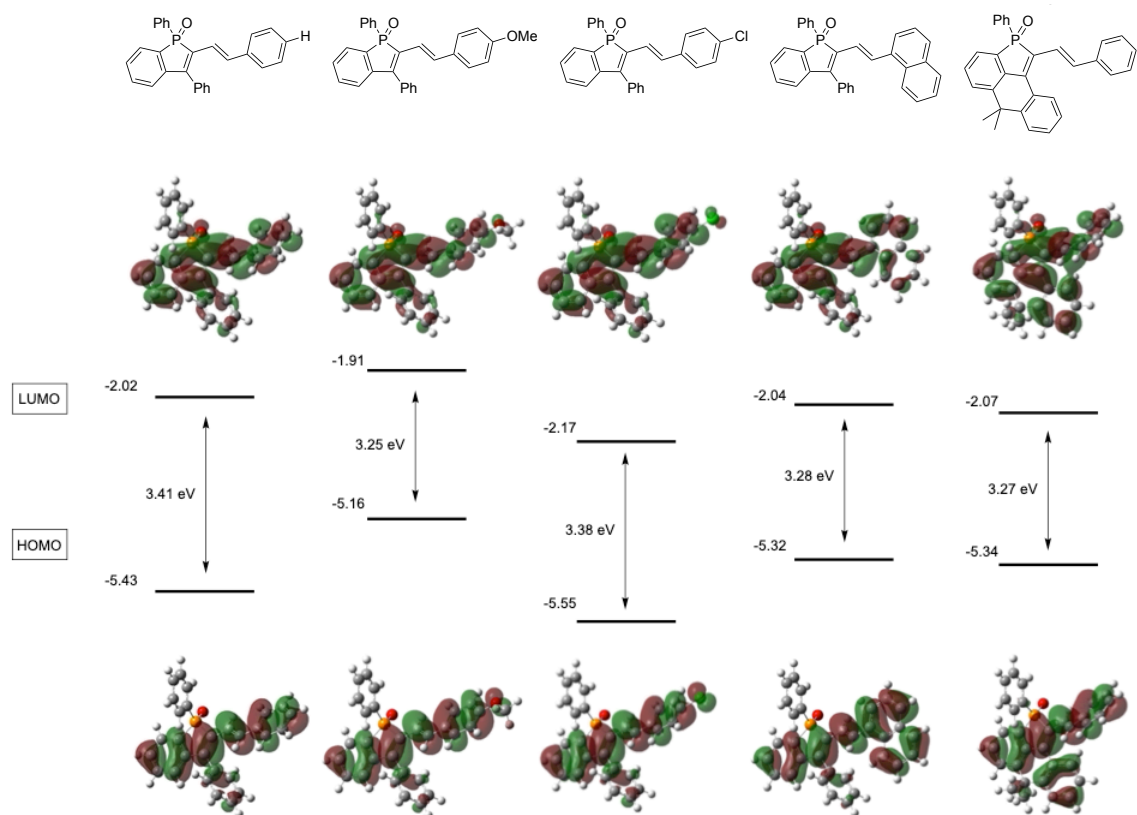

**Figure S4.** HOMOs and LUMOs and their energies calculated at the B3LYP/6-31G\* level of theory.



(a) Top views of **3aa** (S0)

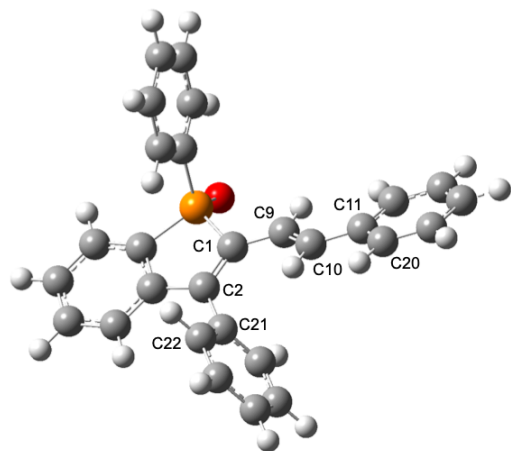

(b) Top views of **3aa** (S1)

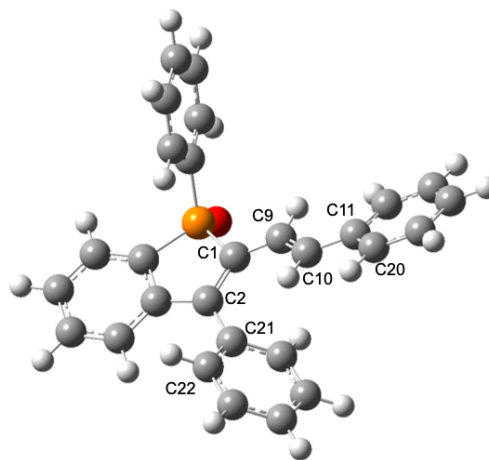

(c) Side views of **3aa** (S0)

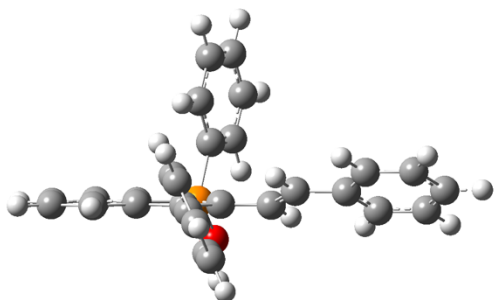

(d) Side views of **3aa** (S1)

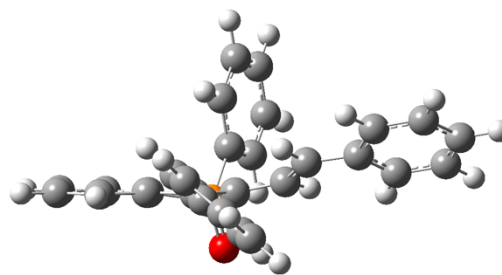

|                 | C2-C1-C9-C10 | C1-C9-C10-C11 | C9-C10-C11-C20 | C1-C2-C21-C22 |
|-----------------|--------------|---------------|----------------|---------------|
| <b>3aa</b> (S0) | -25.6        | -179.1        | 174.9          | 116.8         |
| <b>3aa</b> (S1) | -11.5        | 175.9         | 171.9          | 141.6         |

**Figure S5.** Optimized structures of (a) and (c) **3aa** (S0), (b) and (d) **3aa** (S1): Top views (upper) and side views (lower). Selected torsion angles (deg) of **3aa** (S0) and **3aa** (S1) calculated at the B3LYP/6-31G\* level of theory.

(a) Top views of **3ak** (S0)

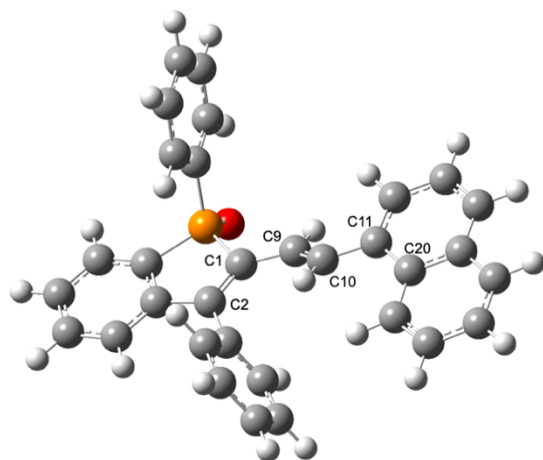

(b) Top views of **3ak** (S1)

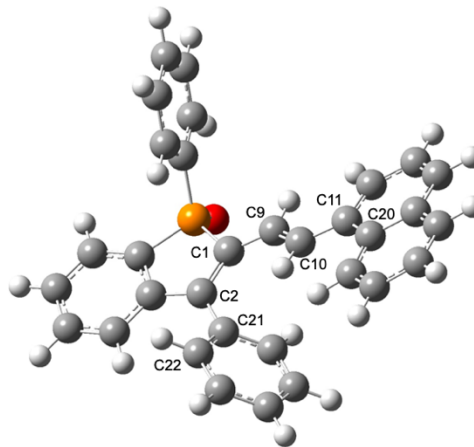

(c) Side views of **3ak** (S0)

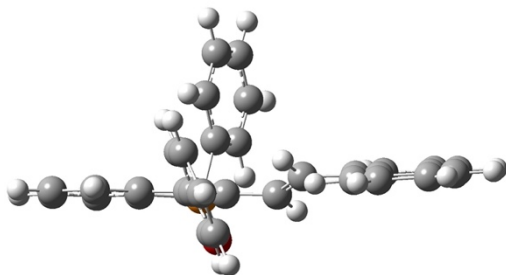

(d) Side views of **3ak** (S1)

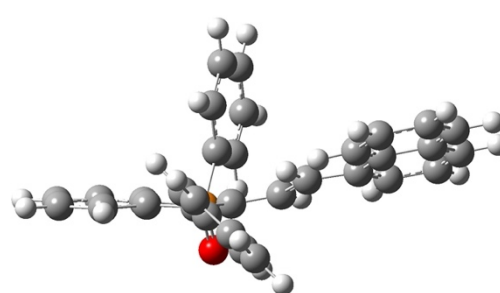

|                 | C2-C1-C9-C10 | C1-C9-C10-C11 | C9-C10-C11-C20 | C1-C2-C21-C22 |
|-----------------|--------------|---------------|----------------|---------------|
| <b>3ak</b> (S0) | -25.7        | -175.8        | -152.4         | 116.1         |
| <b>3ak</b> (S1) | -9.9         | -178.9        | -179.8         | 139.4         |

**Figure S6.** Optimized structures of (a) and (c) **3ak** (S0), (b) and (d) **3ak** (S1): Top views (upper) and side views (lower). Selected torsion angles (deg) of **3ak** (S0) and **3ak** (S1) calculated at the B3LYP/6-31G\* level of theory.

**3aa**

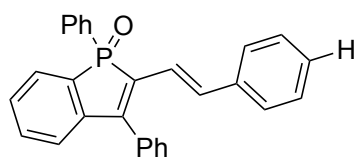

S0 LUMO

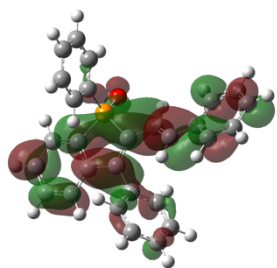

S1 LUMO

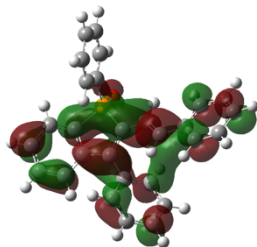

S0 HOMO

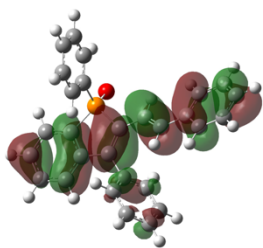

S1 HOMO

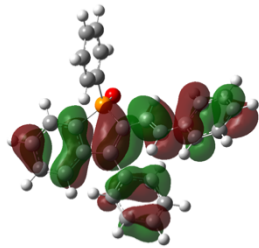

**3ak**

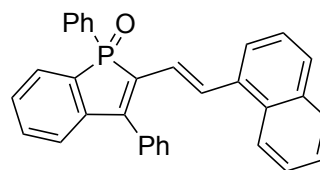

S0 LUMO

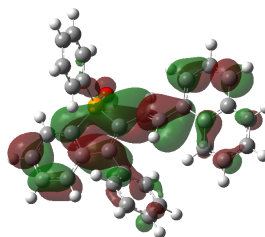

S1 LUMO

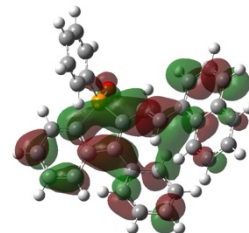

S0 HOMO

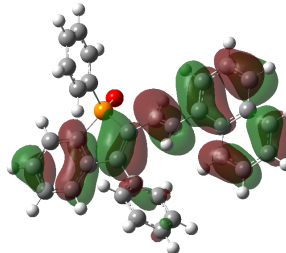

S1 HOMO

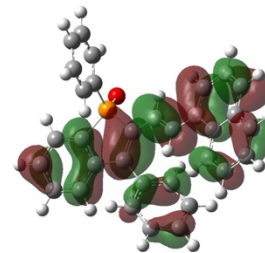

**Figure S7.** HOMOs and LUMOs (S0 and S1) of **3aa** and **3ak**.

## Characterization Data for Products

Copy of  $^1\text{H}$ ,  $^{13}\text{C}\{^1\text{H}\}$ ,  $^{19}\text{F}\{^1\text{H}\}$ , and  $^{31}\text{P}\{^1\text{H}\}$  NMR spectra for all compounds are attached in the last part.

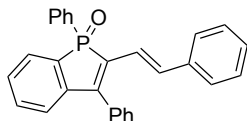

**(E)-1,3-Diphenyl-2-styrylphosphindole 1-oxide (3aa):** Purified by silica gel column chromatography with hexane/ethyl acetate (1/2, v/v): 35 mg (85%, 0.10 mmol scale); Yellow solid; m.p. 96.2-97.9 °C;  $^1\text{H}$  NMR (400 MHz,  $\text{CDCl}_3$ )  $\delta$  7.87-7.82 (m, 2H), 7.68 (dd,  $J = 9.3, 7.4$  Hz, 1H), 7.59-7.55 (m, 2H), 7.53-7.49 (m, 2H), 7.47-7.41 (m, 5H), 7.33, (td,  $J = 7.5, 3.9$  Hz, 1H), 7.27-7.14 (m, 7H), 6.88 (dd,  $J = 23.6, 16.4$  Hz, 1H);  $^{13}\text{C}\{^1\text{H}\}$  NMR (100 MHz,  $\text{CDCl}_3$ )  $\delta$  149.6 (d,  $J = 21.2$  Hz, 1C), 143.5 (d,  $J = 25.8$  Hz, 1C), 136.9 (1C), 135.3 (d,  $J = 5.2$  Hz, 1C), 133.6 (d,  $J = 14.3$  Hz, 1C), 133.0 (d,  $J = 1.8$  Hz, 1C), 132.8 (d,  $J = 95.4$  Hz, 1C), 132.4 (d,  $J = 106.0$  Hz, 1C), 132.2 (d,  $J = 2.8$  Hz, 1C), 130.8 (d,  $J = 10.7$  Hz, 2C), 130.69 (d,  $J = 98.9$ , 1C), 129.2 (2C), 129.1 (d,  $J = 3.0$  Hz, 1C), 129.02 (1C), 128.99 (1C), 128.96 (1C), 128.9 (2C+1C), 128.5 (2C), 128.2 (1C), 126.8 (2C), 123.8 (d,  $J = 10.5$  Hz, 1C), 120.9 (d,  $J = 9.3$  Hz, 1C);  $^{31}\text{P}\{^1\text{H}\}$  NMR (162 MHz,  $\text{CDCl}_3$ )  $\delta$  37.58; HRMS (APCI)  $m/z$  ( $[\text{M}+\text{H}]^+$ ) calcd for  $\text{C}_{28}\text{H}_{22}\text{OP}$ : 405.1403, found: 405.1393.

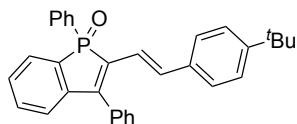

**(E)-2-(4-(tert-Butyl)styryl)-1,3-diphenylphosphindole 1-oxide (3ab):** Purified by silica gel column chromatography with hexane/ethyl acetate (1/2, v/v): 33 mg (70%, 0.10 mmol scale); Yellow solid; m.p. 106.3-107.9 °C;  $^1\text{H}$  NMR (400 MHz,  $\text{CDCl}_3$ )  $\delta$  7.84 (m, 2H), 7.68 (dd,  $J = 9.7, 6.8$  Hz, 1H), 7.58-7.54 (m, 2H), 7.53-7.47 (m, 2H), 7.46-7.40 (m, 5H), 7.32 (td,  $J = 7.4, 3.8$  Hz, 1H), 7.26-7.16 (m, 6H), 6.85 (dd,  $J = 23.8, 16.4$  Hz, 1H), 1.25 (s, 9H);  $^{13}\text{C}\{^1\text{H}\}$  NMR (100 MHz,  $\text{CDCl}_3$ )  $\delta$  151.5 (1C),  $\delta$  149.0 (d,  $J = 21.2$  Hz, 1C), 143.6 (d,  $J = 26.0$  Hz, 1C), 135.2 (d,  $J = 5.2$  Hz, 1C), 134.2 (1C), 133.7 (d,  $J = 14.4$  Hz, 1C), 133.0 (d,  $J = 95.4$  Hz, 1C), 132.9 (d,  $J = 1.9$  Hz, 1C), 132.4 (d,  $J = 107.4$  Hz, 1C), 132.2 (d,  $J = 2.7$  Hz, 1C), 130.80 (d,  $J = 10.6$  Hz, 2C), 130.78 (d,  $J = 99.0$  Hz, 1C), 129.3 (2C), 129.03 (1C), 128.97 (1C), 128.93 (1C), 128.91 (1C), 128.85 (2C+1C), 126.6 (2C), 125.5 (2C), 123.7 (d,  $J = 10.6$  Hz, 1C), 120.3 (d,  $J = 9.3$  Hz, 1C), 34.6 (1C), 31.2 (3C);  $^{31}\text{P}\{^1\text{H}\}$  NMR (162 MHz,  $\text{CDCl}_3$ )  $\delta$  37.66; HRMS (APCI)  $m/z$  ( $[\text{M}+\text{H}]^+$ ) calcd for  $\text{C}_{32}\text{H}_{30}\text{OP}$ : 461.2029, found: 461.2038.

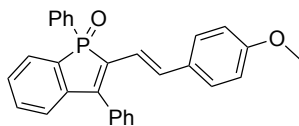

**(E)-2-(4-Methoxystyryl)-1,3-diphenylphosphindole 1-oxide (3ac):** Purified by silica gel column chromatography with hexane/ethyl acetate (1/2, v/v): 30 mg (69%, 0.10 mmol scale); Yellow solid; m.p. 91.2-92.7 °C;  $^1\text{H}$  NMR (400 MHz,  $\text{CDCl}_3$ )  $\delta$  7.87-7.81 (m, 2H), 7.67 (dd,  $J = 9.3, 7.2$  Hz, 1H), 7.59-7.55 (m, 2H), 7.54-7.48 (m, 2H), 7.47-7.40 (m, 5H), 7.32 (td,  $J = 7.4, 3.9$  Hz, 1H), 7.22-7.16 (m, 3H), 7.12 (d,  $J = 16.4$  Hz, 1H), 6.76 (dd,  $J = 23.9, 16.3$  Hz, 1H), 6.77-6.74 (m, 2H), 3.76 (s, 3H);  $^{13}\text{C}\{^1\text{H}\}$  NMR (100 MHz,  $\text{CDCl}_3$ )  $\delta$  159.8 (1C), 148.4 (d,  $J = 21.3$  Hz, 1C), 143.7 (d,  $J = 26.0$  Hz, 1C), 135.0 (d,  $J = 5.4$  Hz, 1C), 133.8 (d,  $J = 14.4$  Hz, 1C), 133.1 (d,  $J = 95.0$  Hz, 1C), 132.9 (d,  $J = 1.2$  Hz, 1C), 132.3 (d,  $J = 105.8$  Hz, 1C), 132.2 (d,  $J = 2.8$  Hz, 1C), 130.9 (d,  $J = 98.8$  Hz, 1C), 130.8 (d,  $J = 10.8$  Hz, 2C), 129.8 (1C), 129.3 (2C), 129.0 (2C), 128.89 (1C), 128.86 (1C), 128.84 (1C), 128.80 (1C), 128.7 (1C), 128.2 (2C), 123.6 (d,  $J = 10.4$  Hz, 1C), 118.9 (d,  $J = 9.2$  Hz, 1C), 114.0 (2C), 55.3 (1C);  $^{31}\text{P}\{^1\text{H}\}$  NMR (162 MHz,  $\text{CDCl}_3$ )  $\delta$  37.70; HRMS (APCI)  $m/z$  ( $[\text{M}+\text{H}]^+$ ) calcd for  $\text{C}_{29}\text{H}_{24}\text{O}_2\text{P}$ : 435.1508, found: 435.1499.

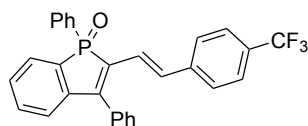

**(E)-1,3-Diphenyl-2-(4-(trifluoromethyl)styryl)phosphindole 1-oxide (3ad):** Purified by silica gel column chromatography with hexane/ethyl acetate (1/2, v/v): 29 mg (61%, 0.10 mmol scale); Yellow solid; m.p. 194.7-196.4 °C;  $^1\text{H}$  NMR (400 MHz,  $\text{CDCl}_3$ )  $\delta$  7.88-7.81 (m, 2H), 7.70 (dd,  $J = 9.9, 7.2$  Hz, 1H), 7.62-7.58 (m, 2H), 7.56-7.52 (m, 2H), 7.49-7.44 (m, 7H), 7.37 (td,  $J = 7.4, 3.9$  Hz, 1H), 7.34 (d,  $J = 8.5$  Hz, 2H), 7.23 (dd,  $J = 7.6, 3.0$  Hz, 1H), 7.17 (d,  $J = 16.4$  Hz, 1H), 6.94 (dd,  $J = 23.2, 16.4$  Hz, 1H);  $^{13}\text{C}\{^1\text{H}\}$  NMR (100 MHz,  $\text{CDCl}_3$ )  $\delta$  151.3 (d,  $J = 21.0$  Hz, 1C),  $\delta$  143.2 (d,  $J = 22.9$  Hz, 1C), 140.3 (1C), 133.4 (d,  $J = 4.8$  Hz, 1C), 133.3 (d,  $J = 13.8$  Hz, 1C), 133.1 (d,  $J = 1.8$  Hz, 1C), 132.41 (d,  $J = 106.1$  Hz, 1C), 132.40 (d,  $J = 2.8$  Hz, 1C), 132.3 (d,  $J = 95.5$  Hz, 1C), 130.8 (d,  $J = 10.8$  Hz, 2C), 130.4 (d,  $J = 99.1$  Hz, 1C), 129.6 (q,  $J = 32.2$  Hz, 1C), 129.4 (d,  $J = 10.8$  Hz, 1C), 129.3 (1C), 129.2 (2C), 129.11 (1C), 129.06 (1C), 129.0 (2C+1C), 126.9 (2C), 125.4 (q,  $J = 3.8$  Hz, 2C), 124.1714 (d,  $J = 10.5$  Hz, 1C), 124.0 (q,  $J = 279.7$  Hz, 1C), 123.3 (d,  $J = 9.3$  Hz, 1C);  $^{19}\text{F}\{^1\text{H}\}$  NMR (376 MHz,  $\text{CDCl}_3$ )  $\delta$  -62.61;  $^{31}\text{P}\{^1\text{H}\}$  NMR (162 MHz,  $\text{CDCl}_3$ )  $\delta$  37.36; HRMS (APCI)  $m/z$  ( $[\text{M}+\text{H}]^+$ ) calcd for

C<sub>29</sub>H<sub>21</sub>F<sub>3</sub>OP: 473.1277, found: 473.1253.

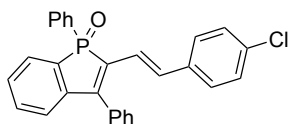

**(E)-2-(4-Chlorostyryl)-1,3-diphenylphosphindole 1-oxide (3ae):** Purified by silica gel column chromatography with hexane/ethyl acetate (1/2, v/v): 36 mg (80%, 0.10 mmol scale); Yellow solid; m.p. 104.6-106.3 °C; <sup>1</sup>H NMR (400 MHz, CDCl<sub>3</sub>) δ 7.86-7.81 (m, 2H), 7.68 (dd, *J* = 9.9, 7.2 Hz, 1H), 7.60-7.50 (m, 4H), 7.48-7.42 (m, 5H), 7.34 (td, *J* = 7.5, 3.9 Hz, 1H), 7.20 (dd, *J* = 7.6, 3.0 Hz, 1H), 7.17 (s, 4H), 7.11 (d, *J* = 16.4 Hz, 1H), 6.84 (dd, *J* = 23.4, 16.3 Hz, 1H); <sup>13</sup>C{<sup>1</sup>H} NMR (100 MHz, CDCl<sub>3</sub>) δ 150.1 (d, *J* = 21.1 Hz, 1C), 143.4 (d, *J* = 25.6 Hz, 1C), 135.4 (1C), 133.820 (d, *J* = 5.1 Hz, 1C), 133.816 (1C), 133.4 (d, *J* = 14.0 Hz, 1C), 133.0 (d, *J* = 1.8 Hz, 1C), 132.6 (d, *J* = 98.1 Hz, 1C), 132.35 (d, *J* = 2.8 Hz, 1C), 132.34 (d, *J* = 106.2 Hz, 1C), 130.8 (d, *J* = 10.6 Hz, 2C), 130.5 (d, *J* = 98.8 Hz, 1C), 129.3 (1C), 129.2 (d, *J* = 3.0 Hz, 1C), 129.15 (1C), 129.11 (1C), 129.08 (1C), 128.99 (1C), 128.96 (3C), 128.7 (2C), 128.0 (2C), 124.0 (d, *J* = 10.7 Hz, 1C), 121.4 (d, *J* = 9.4 Hz, 1C); <sup>31</sup>P{<sup>1</sup>H} NMR (162 MHz, CDCl<sub>3</sub>) δ 37.52; HRMS (APCI) *m/z* ([*M*+*H*]<sup>+</sup>) calcd for C<sub>28</sub>H<sub>21</sub>ClOP: 439.1013, found: 439.0991.

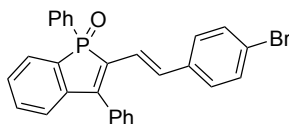

**(E)-2-(4-Bromostyryl)-1,3-diphenylphosphindole 1-oxide (3af):** Purified by silica gel column chromatography with hexane/ethyl acetate (1/2, v/v) and GPC (CHCl<sub>3</sub>): 19 mg (38%, 0.10 mmol scale); Yellow solid; m.p. 106.2-107.8 °C; <sup>1</sup>H NMR (400 MHz, CDCl<sub>3</sub>) δ 7.86-7.80 (m, 2H), 7.68 (dd, *J* = 9.8, 7.1 Hz, 1H) 7.60-7.56 (m, 2H), 7.54-7.51 (m, 2H), 7.48-7.42 (m, 5H), 7.38-7.35 (m, 1H), 7.34-7.31 (m, 2H), 7.20 (dd, *J* = 7.6, 3.0 Hz, 1H), 7.12-7.07 (m, 3H), 6.85 (dd, *J* = 23.4, 16.4 Hz, 1H); <sup>13</sup>C{<sup>1</sup>H} NMR (100 MHz, CDCl<sub>3</sub>) δ 150.2 (d, *J* = 21.0 Hz, 1C), 143.4 (d, *J* = 25.7 Hz, 1C), 135.8 (1C), 133.9 (d, *J* = 5.2 Hz, 1C), 133.4 (d, *J* = 14.0 Hz, 1C), 133.0 (d, *J* = 2.6 Hz, 1C), 132.6 (d, *J* = 95.3 Hz, 1C), 132.4 (d, *J* = 103.4 Hz, 1C), 132.3 (d, *J* = 2.8 Hz, 1C), 131.6 (2C), 130.8 (d, *J* = 10.7 Hz, 2C), 130.5 (d, *J* = 99.0 Hz, 1C), 129.3 (1C), 129.2 (2C), 129.11 (2C), 129.07 (1C), 129.0 (1C), 128.94 (2C), 128.2 (2C), 124.0 (d, *J* = 10.7 Hz, 1C), 122.1 (1C), 121.5 (d, *J* = 9.4 Hz, 1C); <sup>31</sup>P{<sup>1</sup>H} NMR (162 MHz, CDCl<sub>3</sub>) δ 37.46; HRMS (APCI) *m/z* ([*M*+*H*]<sup>+</sup>) calcd for C<sub>28</sub>H<sub>21</sub>BrOP: 483.0508, found: 483.0516.

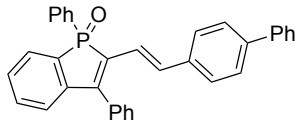

**(E)-2-(2-((1,1'-Biphenyl)-4-yl)vinyl)-1,3-diphenylphosphindole 1-oxide (3ag):** Purified by silica gel column chromatography with hexane/ethyl acetate (1/2, v/v): 39 mg (80%, 0.10 mmol scale); Yellow solid; m.p. 106.2-107.8 °C;  $^1\text{H}$  NMR (400 MHz,  $\text{CDCl}_3$ )  $\delta$  7.89-7.83 (m, 2H), 7.68 (dd,  $J = 9.8, 7.2$  Hz, 1H), 7.61-7.57 (m, 2H), 7.55-7.50 (m, 4H), 7.48-7.44 (m, 7H), 7.43-7.38 (m, 2H), 7.37-7.29 (m, 4H), 7.23-7.19 (m, 2H), 6.93 (dd,  $J = 23.7, 16.4$  Hz, 1H);  $^{13}\text{C}\{^1\text{H}\}$  NMR (100 MHz,  $\text{CDCl}_3$ )  $\delta$  149.6 (d,  $J = 21.3$  Hz, 1C),  $\delta$  143.5 (d,  $J = 25.8$  Hz, 1C), 140.9 (1C), 140.5 (1C), 136.0 (1C), 134.9 (1C), 134.8 (1C), 133.6 (d,  $J = 14.4$  Hz, 1C), 133.0 (d,  $J = 1.1$  Hz, 1C), 132.9 (d,  $J = 95.4$  Hz, 1C), 132.4 (d,  $J = 105.8$  Hz, 1C), 132.3 (d,  $J = 2.8$  Hz, 1C), 130.8 (d,  $J = 10.6$  Hz, 2C), 130.7 (d,  $J = 99.0$  Hz, 1C), 129.3 (2C), 129.10 (1C), 129.08 (1C), 129.05 (1C), 129.02 (1C), 128.99 (1C), 128.92 (2C), 128.80 (2C), 127.4 (1C), 127.3 (1C), 127.2 (2C), 126.9 (2C), 123.8 (d,  $J = 10.6$  Hz, 1C), 121.0 (d,  $J = 9.2$  Hz, 1C);  $^{31}\text{P}\{^1\text{H}\}$  NMR (162 MHz,  $\text{CDCl}_3$ )  $\delta$  37.58; HRMS (APCI)  $m/z$  ( $[\text{M}+\text{H}]^+$ ) calcd for  $\text{C}_{34}\text{H}_{26}\text{OP}$ : 481.1716, found: 481.1735.

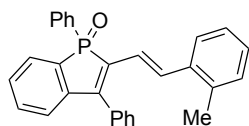

**(E)-2-(2-Methylstyryl)-1,3-diphenylphosphindole 1-oxide (3ah):** Purified by silica gel column chromatography with hexane/ethyl acetate (1/2v/v): 34 mg (81%, 0.10 mmol scale); Yellow solid; m.p. 184.6-186.3 °C;  $^1\text{H}$  NMR (400 MHz,  $\text{CDCl}_3$ )  $\delta$  7.89-7.83 (m, 2H), 7.68 (dd,  $J = 9.9, 7.2$  Hz, 1H), 7.58-7.54 (m, 2H), 7.53-7.50 (m, 2H), 7.48-7.42 (m, 5H), 7.36-7.32 (m, 2H), 7.27-7.25 (m, 1H), 7.21 (dd,  $J = 7.6, 3.0$  Hz, 1H), 7.09-7.01 (m, 3H), 6.76 (dd,  $J = 23.6, 16.2$  Hz, 1H), 2.10 (s, 3H);  $^{13}\text{C}\{^1\text{H}\}$  NMR (100 MHz,  $\text{CDCl}_3$ )  $\delta$  149.2 (d,  $J = 21.0$  Hz, 1C),  $\delta$  143.8 (d,  $J = 25.7$  Hz, 1C), 136.4 (1C), 135.9 (1C), 133.6334 (d,  $J = 5.6$  Hz, 1C), 133.61165 (d,  $J = 14.3$  Hz, 1C), 133.61165 (d,  $J = 14.3$  Hz, 1C), 133.5 (d,  $J = 97.5$  Hz, 1C), 132.3 (d,  $J = 105.8$  Hz, 1C), 132.2 (d,  $J = 2.8$  Hz, 1C), 130.9 (d,  $J = 10.6$  Hz, 2C), 130.8 (d,  $J = 98.3$  Hz, 1C), 130.3 (1C), 129.2 (2C), 129.06 (d,  $J = 6.9$  Hz, 1C), 129.0 (2C), 128.94 (1C), 128.92 (1C), 128.88 (2C), 128.1 (1C), 125.9 (1C), 124.9 (1C), 123.8 (d,  $J = 10.5$  Hz, 1C), 121.7 (d,  $J = 9.3$  Hz, 1C), 19.5 (1C);  $^{31}\text{P}\{^1\text{H}\}$  NMR (162 MHz,  $\text{CDCl}_3$ )  $\delta$  37.58; HRMS (APCI)  $m/z$  ( $[\text{M}+\text{H}]^+$ ) calcd for  $\text{C}_{29}\text{H}_{24}\text{OP}$ : 419.1559, found: 419.1568.

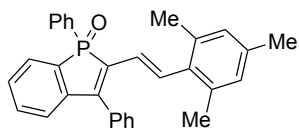

**(E)-1,3-Diphenyl-2-(2,4,6-trimethylstyryl)phosphindole 1-oxide (3ai):** Purified by silica gel column chromatography with hexane/ethyl acetate (1/2, v/v) and GPC (CHCl<sub>3</sub>): 14 mg (31%, 0.10 mmol scale); Yellow solid; m.p. 89.5-91.2 °C; <sup>1</sup>H NMR (400 MHz, CDCl<sub>3</sub>) δ 7.90-7.84 (m, 2H), 7.69 (dd, *J* = 9.9, 7.2 Hz, 1H), 7.54-7.41 (m, 9H), 7.33 (td, *J* = 7.2, 3.8, Hz, 1H), 7.22 (dd, *J* = 7.6, 3.0 Hz, 1H), 7.13 (d, *J* = 16.7 Hz, 1H), 6.73 (s, 2H), 6.37 (dd, *J* = 23.8, 16.7 Hz, 1H), 2.18 (s, 3H), 1.97 (6H); <sup>13</sup>C{<sup>1</sup>H} NMR (100 MHz, CDCl<sub>3</sub>) δ 149.0 (d, *J* = 21.1 Hz, 1C), 143.6 (d, *J* = 26.0 Hz, 1C), 136.8 (1C), 136.0 (2C), 134.7 (d, *J* = 5.7 Hz, 1C), 133.561 (d, *J* = 14.6 Hz, 1C), 133.557 (1C), 133.2 (d, *J* = 95.3 Hz, 1C), 132.9 (d, *J* = 1.3 Hz, 1C), 132.5 (d, *J* = 105.7 Hz, 1C), 132.2 (d, *J* = 2.8 Hz, 1C), 131.0 (d, *J* = 10.7 Hz, 2C), 130.7 (d, *J* = 98.9 Hz, 1C), 129.1 (1C), 129.0 (3C), 128.86 (1C), 128.85 (2C), 128.7 (4C), 125.8 (d, *J* = 9.0 Hz, 1C), 123.7 (d, *J* = 10.4 Hz, 1C), 20.9 (1C), 20.7 (2C); <sup>31</sup>P{<sup>1</sup>H} NMR (162 MHz, CDCl<sub>3</sub>) δ 37.39; HRMS (APCI) *m/z* ([*M*+*H*]<sup>+</sup>) calcd for C<sub>31</sub>H<sub>28</sub>OP: 447.1872, found: 447.1854.

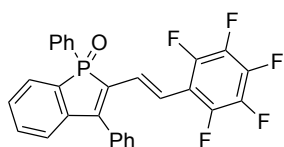

**(E)-2-(2-(Perfluorophenyl)vinyl)-1,3-diphenylphosphindole 1-oxide (3aj):** Purified by silica gel column chromatography with hexane/ethyl acetate (1/2, v/v): 37 mg (74%, 0.10 mmol scale); Yellow solid; m.p. 193.0-194.7 °C; <sup>1</sup>H NMR (400 MHz, CDCl<sub>3</sub>) δ 7.84-7.79 (m, 2H), 7.71 (dd, *J* = 10.0, 7.2 Hz, 1H), 7.59-7.38 (m, 10H), 7.28 (dd, *J* = 7.6, 3.0 Hz, 1H), 7.15 (dd, *J* = 22.4, 16.8 Hz, 1H), 7.00 (d, *J* = 16.9 Hz, 1H); <sup>13</sup>C{<sup>1</sup>H} NMR (100 MHz, CDCl<sub>3</sub>) δ 152.5 (d, *J* = 20.8 Hz, 1C), 144.6 (dm, *J* = 253.7 Hz, 2C), 142.2 (d, *J* = 25.3 Hz, 1C), 140.0 (dm, *J* = 259.0 Hz, 1C), 137.6 (dm, *J* = 249.3 Hz, 2C), 133.2 (d, *J* = 1.6 Hz, 1C), 132.850 (d, *J* = 13.8 Hz, 1C), 132.848 (d, *J* = 95.4 Hz, 1C), 132.49 (d, *J* = 106.2 Hz, 1C), 132.48 (d, *J* = 2.9 Hz, 1C), 130.7 (d, *J* = 10.7 Hz, 2C), 130.0 (d, *J* = 99.2 Hz, 1C), 129.8 (d, *J* = 10.9 Hz, 1C), 129.4 (1C), 129.3 (d, *J* = 9.8 Hz, 1C), 129.1 (2C), 129.0 (1C+1C+1C), 128.9 (2C), 124.5 (d, *J* = 10.6 Hz, 1C), 118.9 (dt, *J* = 3.0, 2.5 Hz, 1C), 112.2 (td, *J* = 13.3, 4.0 Hz, 1C); <sup>19</sup>F{<sup>1</sup>H} NMR (376 MHz, CDCl<sub>3</sub>) δ -141.86 (d, *J* = 21.5 Hz), -141.88 (d, *J* = 21.5 Hz), -155.3 (t, *J* = 20.7 Hz), -162.8 (t, *J* = 20.9 Hz), -162.9 (t, *J* = 20.9 Hz); <sup>31</sup>P{<sup>1</sup>H} NMR (162 MHz, CDCl<sub>3</sub>) δ 36.80; HRMS (APCI) *m/z* ([*M*+*H*]<sup>+</sup>) calcd for C<sub>28</sub>H<sub>17</sub>F<sub>5</sub>OP: 495.0932, found: 495.0953.



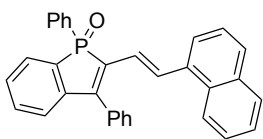

**(E)-2-(2-(Naphthalen-1-yl)vinyl)-1,3-diphenylphosphindole 1-oxide (3ak):** Purified by silica gel column chromatography with hexane/ethyl acetate (1/2, v/v): 42 mg (91%, 0.10 mmol scale); Yellow solid; m.p. 233.0-234.7 °C;  $^1\text{H}$  NMR (400 MHz,  $\text{CDCl}_3$ )  $\delta$  7.97-7.91 (m, 3H), 7.77-7.69 (m, 4H), 7.59-7.55 (m, 3H), 7.53-7.35 (m, 10H), 7.32 (t,  $J = 7.8$  Hz, 1H), 7.23 (dd,  $J = 7.6, 3.0$  Hz, 1H), 6.91 (dd,  $J = 23.6, 16.1$  Hz, 1H);  $^{13}\text{C}\{^1\text{H}\}$  NMR (100 MHz,  $\text{CDCl}_3$ )  $\delta$  149.6 (d,  $J = 21.1$  Hz, 1C), 143.7 (d,  $J = 25.8$  Hz, 1C), 134.5 (1C), 133.6 (d,  $J = 14.6$  Hz, 1C), 135.5 (1C), 133.4 (d,  $J = 95.3$  Hz, 1C), 133.0 (1C), 132.9 (d,  $J = 7.6$  Hz, 1C), 132.31 (d,  $J = 2.8$  Hz, 1C), 132.30 (d,  $J = 105.8$  Hz, 1C), 131.1 (1C), 131.0 (d,  $J = 10.6$  Hz, 2C), 130.9 (d,  $J = 98.5$  Hz, 1C), 129.2 (2C), 129.15 (1C), 129.12 (1C), 129.05 (1C), 129.0 (2C), 128.9 (2C), 128.6 (1C), 128.4 (1C), 126.2 (1C), 125.9 (1C), 125.4 (1C), 123.9 (d,  $J = 10.6$  Hz, 1C), 123.7 (1C), 123.37 (1C), 123.36 (d,  $J = 9.1$  Hz, 1C);  $^{31}\text{P}\{^1\text{H}\}$  NMR (162 MHz,  $\text{CDCl}_3$ )  $\delta$  37.39; HRMS (APCI)  $m/z$  ( $[\text{M}+\text{H}]^+$ ) calcd for  $\text{C}_{32}\text{H}_{24}\text{OP}$ : 455.1559, found: 455.1548.

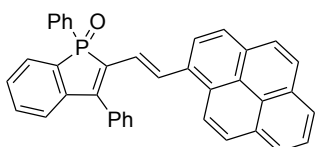

**(E)-1,3-Diphenyl-2-(2-(pyren-1-yl)vinyl)phosphindole 1-oxide (3al):** Purified by silica gel column chromatography with hexane/ethyl acetate (1/2, v/v): 28 mg (%, 0.10 mmol scale); Orange solid; m.p. 214.7-216.4 °C;  $^1\text{H}$  NMR (400 MHz,  $\text{CDCl}_3$ )  $\delta$  8.24 (d,  $J = 16.1$  Hz, 1H), 8.14 (dd,  $J = 7.6, 3.0$  Hz, 2H), 8.04-7.93 (m, 9H), 7.75 (dd,  $J = 9.9, 7.2$  Hz, 1H), 7.62-7.52 (m, 8H), 7.48 (t,  $J = 7.6$  Hz, 1H), 7.38 (td,  $J = 7.4, 3.8$  Hz, 1H), 7.26 (dd,  $J = 7.6, 3.0$  Hz, 1H), 7.1 (dd,  $J = 23.6, 16.1$  Hz, 1H);  $^{13}\text{C}\{^1\text{H}\}$  NMR (100 MHz,  $\text{CDCl}_3$ )  $\delta$  149.5 (d,  $J = 21.1$  Hz, 1C), 143.8 (d,  $J = 25.6$  Hz, 1C), 133.7 (d,  $J = 14.0$  Hz, 1C), 133.6 (d,  $J = 95.3$  Hz, 1C), 133.1 (d,  $J = 1.9$  Hz, 1C), 132.8 (d,  $J = 5.0$  Hz, 1C), 132.4 (d,  $J = 2.8$  Hz, 1C), 132.3 (d,  $J = 106.8$  Hz, 1C), 131.4 (1C), 131.31 (1C), 131.28 (1C), 131.0 (d,  $J = 10.7$  Hz, 2C), 130.94 (d,  $J = 98.8$  Hz, 1C), 130.88 (1C), 129.3 (2C), 129.21 (1C), 129.18 (1C), 129.13 (d,  $J = 4.5$  Hz, 1C), 129.06 (1C), 129.04 (1C), 128.98 (2C), 128.6 (1C), 127.8 (1C), 127.6 (1C), 127.3 (1C), 126.0 (1C), 125.4 (1C), 125.2 (1C), 124.9 (1C), 124.8 (1C), 124.7 (1C), 123.9 (d,  $J = 10.6$  Hz, 1C), 123.4 (d,  $J = 9.3$  Hz, 1C), 123.2 (1C), 123.0 (1C);  $^{31}\text{P}\{^1\text{H}\}$  NMR (162 MHz,  $\text{CDCl}_3$ )  $\delta$  37.52; HRMS (APCI)  $m/z$  ( $[\text{M}+\text{H}]^+$ ) calcd for  $\text{C}_{38}\text{H}_{26}\text{OP}$ : 529.1716, found: 529.1701.

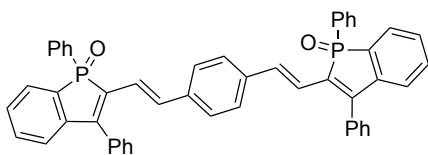

**2,2'-(1*E*,1'*E*)-1,4-Phenylenebis(ethene-2,1-diyl)bis(1,3-diphenylphosphindole 1-oxide) (a 1:1 mixture of diastereomers) (3am):** Purified by GPC (CHCl<sub>3</sub>): 18 mg (47%, 0.050 mmol scale); Yellow solid; m.p. 194.7-196.3 °C; <sup>1</sup>H NMR (400 MHz, CDCl<sub>3</sub>) δ 7.84-7.78 (m, 4H), 7.66 (dd, *J* = 9.8, 7.0 Hz, 2H), 7.57-7.48 (m, 8H), 7.45-7.40 (m, 10H), 7.33 (td, *J* = 7.4, 3.8 Hz, 2H), 7.19 (dd, *J* = 7.7, 2.7 Hz, 2H), 7.10 (d, *J* = 2.5 Hz, 4H), 7.06 (dd, *J* = 16.4, 2.9 Hz, 2H), 6.83 (dd, *J* = 23.6, 16.3 Hz, 2H); <sup>13</sup>C{<sup>1</sup>H} NMR (100 MHz, CDCl<sub>3</sub>) δ 149.7 (d, *J* = 21.2 Hz, 2C), 143.5 (d, *J* = 25.6 Hz, 2C), 136.8 (2C), 134.6 (d, *J* = 5.1 Hz, 2C), 133.5 (d, *J* = 14.2 Hz, 2C), 132.8 (d, *J* = 94.8 Hz, 2C), 133.0 (2C), 132.4 (d, *J* = 104.3 Hz, 2C), 132.2 (2C), 130.8 (d, *J* = 10.7 Hz, 4C), 130.6 (d, *J* = 98.4 Hz, 2C), 129.2 (4C), 129.1 (d, *J* = 4.0 Hz, 2C), 129.00 (4C), 128.97 (2C), 128.90 (2C), 128.88 (4C), 126.9 (4C), 123.8 (d, *J* = 10.4 Hz, 2C), 121.2 (d, *J* = 9.2 Hz, 2C); <sup>31</sup>P{<sup>1</sup>H} NMR (162 MHz, CDCl<sub>3</sub>) δ 37.46, 37.44; HRMS (APCI) *m/z* ([*M*+*H*]<sup>+</sup>) calcd for C<sub>50</sub>H<sub>37</sub>O<sub>2</sub>P<sub>2</sub>: 731.2263, found: 731.2250.

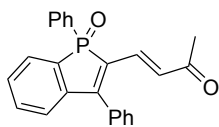

**(*E*)-4-(1-Oxido-1,3-diphenylphosphindol-2-yl)but-3-en-2-one (3an):** Purified by GPC (CHCl<sub>3</sub>): 26 mg (71%, 0.10 mmol scale); Pale yellow solid; m.p. 166.3-168.0 °C; <sup>1</sup>H NMR (400 MHz, CDCl<sub>3</sub>) δ 7.80-7.68 (m, 2H), 7.71 (dd, *J* = 9.9, 7.2 Hz, 1H), 7.60-7.54 (m, 4H), 7.50-7.40 (m, 6H), 7.29 (dd, *J* = 7.8, 3.0 Hz, 1H), 7.25 (dd, *J* = 23.4, 16.0 Hz, 1H), 6.71 (d, *J* = 16.0 Hz, 1H), 2.14 (s, 3H); <sup>13</sup>C{<sup>1</sup>H} NMR (100 MHz, CDCl<sub>3</sub>) δ 197.7 (1C), 157.8 (d, *J* = 22.2 Hz, 1C), 142.6 (d, *J* = 24.9 Hz, 1C), 133.8 (d, *J* = 9.3 Hz, 1C), 133.2 (d, *J* = 1.9 Hz, 1C), 133.0 (d, *J* = 106.0 Hz, 1C), 132.6 (d, *J* = 2.8 Hz, 1C), 132.4 (d, *J* = 13.6 Hz, 1C), 130.824 (d, *J* = 4.0 Hz, 1C), 130.76 (d, *J* = 11.3 Hz, 2C), 130.77 (d, *J* = 96.5 Hz, 1C), 130.6 (d, *J* = 10.7 Hz, 1C), 129.8 (1C), 129.5 (d, *J* = 102.0 Hz, 1C), 129.3 (d, *J* = 9.4 Hz, 1C), 129.2 (1C), 129.09 (2C), 129.08 (1C), 129.0 (2C), 125.2 (d, *J* = 10.3 Hz, 1C), 28.8 (1C); <sup>31</sup>P{<sup>1</sup>H} NMR (162 MHz, CDCl<sub>3</sub>) δ 36.36; HRMS (APCI) *m/z* ([*M*+*H*]<sup>+</sup>) calcd for C<sub>24</sub>H<sub>20</sub>O<sub>2</sub>P: 371.1195, found: 371.1195.

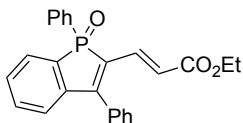

**Ethyl (*E*)-3-(1-oxido-1,3-diphenylphosphindol-2-yl)acrylate (**3ao**):** Purified by silica gel column chromatography with hexane/ethyl acetate (1/2, v/v): 25 mg (62%, 0.10 mmol scale); Pale yellow solid; m.p. 144.6-146.3 °C;  $^1\text{H}$  NMR (400 MHz,  $\text{CDCl}_3$ )  $\delta$  7.80-7.74(m, 2H), 7.70 (dd,  $J = 9.9, 7.2$  Hz, 1H), 7.59-7.53 (m, 4H), 7.52-7.40 (m, 6H), 7.39 (dd,  $J = 23.7, 16.1$  Hz, 1H), 7.28 (dd,  $J = 7.4, 2.8$  Hz, 1H), 6.43 (dd,  $J = 16.0, 1.1$  Hz, 1H), 4.14 (dq,  $J = 10.9, 7.1$  Hz, 1H), 4.06 (dq,  $J = 10.9, 7.1$  Hz, 1H), 1.21 (t,  $J = 7.2$  Hz, 3H);  $^{13}\text{C}\{^1\text{H}\}$  NMR (100 MHz,  $\text{CDCl}_3$ )  $\delta$  166.6 (1C), 156.7 (d,  $J = 20.6$  Hz, 1C), 142.5 (d,  $J = 25.2$  Hz, 1C), 135.5 (d,  $J = 9.1$  Hz, 1C), 133.0 (d,  $J = 105.5$  Hz, 1C), 133.1 (d,  $J = 1.5$  Hz, 1C), 132.5 (d,  $J = 3.1$  Hz, 1C), 132.5 (d,  $J = 13.4$  Hz, 1C), 130.8 (d,  $J = 10.9$  Hz, 2C), 130.6 (d,  $J = 96.4$  Hz, 1C), 130.4 (d,  $J = 10.7$  Hz, 1C), 129.7 (1C), 129.5 (d,  $J = 105.6$  Hz, 1C), 129.23 (d,  $J = 8.8$  Hz, 1C), 129.18 (1C), 129.1 (2C), 129.0 (2C+1C), 125.1 (d,  $J = 10.5$  Hz, 1C), 123.6 (d,  $J = 4.6$  Hz, 1C), 60.5 (1C), 14.2 (1C);  $^{31}\text{P}\{^1\text{H}\}$  NMR (162 MHz,  $\text{CDCl}_3$ )  $\delta$  36.43; HRMS (APCI)  $m/z$  ( $[\text{M}+\text{H}]^+$ ) calcd for  $\text{C}_{25}\text{H}_{22}\text{O}_3\text{P}$ : 401.1301, found: 401.1298.

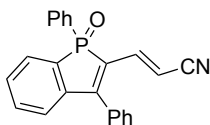

**A 92:8 mixture of (*E*)-3-(1-Oxido-1,3-diphenylphosphindol-2-yl)acrylonitrile ((*E*)-**3ap**) and (*Z*)-3-(1-Oxido-1,3-diphenylphosphindol-2-yl)acrylonitrile ((*Z*)-**3ap**):** Purified by silica gel column chromatography with hexane/ethyl acetate (1/2, v/v): 25 mg (62%, 0.10 mmol scale); Pale yellow solid; m.p. 82.8-84.5 °C;  $^1\text{H}$  NMR (400 MHz,  $\text{CDCl}_3$ ) for (*E*)-**3ap**:  $\delta$  7.76-7.69 (m, 3H), 7.62-7.45 (m, 8H), 7.40-7.38 (m, 2H), 7.32 (dd,  $J = 7.3, 2.8$  Hz, 1H), 7.07 (dd,  $J = 22.2, 16.5$  Hz, 1H), 5.90 (dd,  $J = 16.6, 1.0$  Hz, 1H);  $^{13}\text{C}\{^1\text{H}\}$  NMR (100 MHz,  $\text{CDCl}_3$ ) for (*E*)-**3ap**:  $\delta$  157.4 (d,  $J = 19.8$  Hz, 1C), 142.1 (d,  $J = 24.6$  Hz, 1C), 141.8 (d,  $J = 9.2$  Hz, 1C), 133.4 (d,  $J = 2.0$  Hz, 1C), 133.0 (d,  $J = 2.9$  Hz, 1C), 132.7 (d,  $J = 106.3$  Hz, 1C), 131.8 (d,  $J = 12.9$  Hz, 1C), 131.0 (d,  $J = 11.0$  Hz, 1C), 130.7 (d,  $J = 10.9$  Hz, 2C), 130.2 (1C), 130.0 (d,  $J = 96.8$  Hz, 1C), 129.42 (d,  $J = 10.0$  Hz, 1C), 129.41 (1C), 129.3 (1C), 129.2 (2C), 128.9 (2C), 128.8 (d,  $J = 96.2$  Hz, 1C), 125.7 (d,  $J = 10.5$  Hz, 1C), 117.9 (1C), 101.3 (d,  $J = 5.6$  Hz, 1C);  $^{31}\text{P}\{^1\text{H}\}$  NMR (162 MHz,  $\text{CDCl}_3$ ) for (*E*)-**3ap**:  $\delta$  36.01; HRMS (APCI)  $m/z$  ( $[\text{M}+\text{H}]^+$ ) calcd for  $\text{C}_{23}\text{H}_{17}\text{NOP}$ : 354.1042, found: 354.1044.

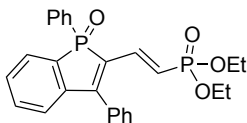

**Diethyl (E)-(2-(1-oxido-1,3-diphenylphosphindol-2-yl)vinyl)phosphonate (3aq):** Purified by GPC ( $\text{CHCl}_3$ ): 29 mg (62%, 0.10 mmol scale); Yellow solid; m.p. 129.5-131.1 °C;  $^1\text{H}$  NMR (400 MHz,  $\text{CDCl}_3$ )  $\delta$  7.78-7.72 (m, 2H), 7.7 (dd,  $J = 9.7, 7.5$  Hz, 1H), 7.58-7.39 (m, 10H), 7.28 (dd,  $J = 7.5, 2.9$  Hz, 1H), 7.19 (ddd,  $J = 22.8, 21.7, 17.4$  Hz, 1H), 6.33 (dd,  $J = 17.4, 17.4$  Hz, 1H), 3.99 (qd,  $J = 7.2, 7.1$  Hz, 2H), 3.78 (dq,  $J = 10.1, 7.6, 7.1$  Hz, 1H), 3.68 (dq,  $J = 10.1, 7.3, 7.1$  Hz, 1H), 1.25 (t,  $J = 7.0$  Hz, 3H), 1.04 (t,  $J = 7.1$  Hz, 3H);  $^{13}\text{C}\{^1\text{H}\}$  NMR (100 MHz,  $\text{CDCl}_3$ )  $\delta$  156.0 (d,  $J = 20.6$  Hz, 1C), 142.5 (dd,  $J = 25.7, 2.2$  Hz, 1C), 139.7 (dd,  $J = 9.1, 7.6$  Hz, 1C), 133.2 (d,  $J = 1.8$  Hz, 1C), 132.8 (d,  $J = 105.6$  Hz, 1C), 132.3 (d,  $J = 13.6$  Hz, 1C), 132.5 (d,  $J = 2.8$  Hz, 1C), 131.0 (dd,  $J = 96.9, 26.4$  Hz, 1C), 130.8 (d,  $J = 10.8$  Hz, 2C), 130.4 (d,  $J = 10.5$  Hz, 1C), 129.8 (1C), 129.6 (d,  $J = 105.7$  Hz, 1C), 129.2 (d,  $J = 9.9$  Hz, 1C), 129.1 (3C), 129.0 (3C), 125.2 (d,  $J = 10.6$  Hz, 1C), 120.7 (dd,  $J = 185.7, 4.7$  Hz, 1C), 61.9 (d,  $J = 5.3$  Hz, 1C), 61.7 (d, 5.2 Hz, 1C), 16.3 (d,  $J = 6.6$  Hz, 1C), 16.1 (d,  $J = 6.4$  Hz, 1C);  $^{31}\text{P}\{^1\text{H}\}$  NMR (162 MHz,  $\text{CDCl}_3$ )  $\delta$  36.66 (d,  $J = 3.9$  Hz), 17.52 (d,  $J = 3.9$  Hz); HRMS (APCI)  $m/z$  ( $[\text{M}+\text{H}]^+$ ) calcd for  $\text{C}_{26}\text{H}_{27}\text{O}_4\text{P}_2$ : 465.1379, found: 465.1399.

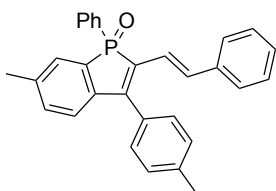

**(E)-6-Methyl-1-phenyl-2-styryl-3-(p-tolyl)phosphindole 1-oxide (3ba):** Purified by silica gel column chromatography with hexane/ethyl acetate (1/1, v/v): 36 mg (80%, 0.10 mmol scale); Yellow solid; m.p. 101.1-102.8 °C;  $^1\text{H}$  NMR (400 MHz,  $\text{CDCl}_3$ )  $\delta$  7.87-7.82 (m, 2H), 7.54-7.42 (m, 4H), 7.38-7.33 (m, 4H), 7.27-7.10 (m, 8H), 6.90 (dd,  $J = 23.7, 16.4$  Hz, 1H), 2.48 (s, 3H), 2.33 (s, 3H);  $^{13}\text{C}\{^1\text{H}\}$  NMR (100 MHz,  $\text{CDCl}_3$ )  $\delta$  150.0 (d,  $J = 21.4$  Hz, 1C), 141.0 (d,  $J = 26.0$  Hz, 1C), 139.4 (d,  $J = 10.5$  Hz, 1C), 138.9 (1C), 137.1 (1C), 134.4 (d,  $J = 5.2$  Hz, 1C), 133.4 (d,  $J = 1.6$  Hz, 1C), 132.6 (d,  $J = 105.5$  Hz, 1C), 132.1 (d,  $J = 2.7$  Hz, 1C), 131.5 (d,  $J = 96.2$  Hz, 1C), 131.0 (d,  $J = 98.7$  Hz, 1C), 130.8 (d,  $J = 10.5$  Hz, 2C), 130.7 (d,  $J = 13.7$  Hz, 1C), 129.7 (d,  $J = 9.7$  Hz, 1C), 129.5 (2C), 129.2 (2C), 129.0 (1C), 128.9 (1C), 128.4 (2C), 128.0 (1C), 126.7 (2C), 123.7 (d,  $J = 11.1$  Hz, 1C), 121.2 (d,  $J = 9.4$  Hz, 1C), 21.5 (1C), 21.3 (1C);  $^{31}\text{P}\{^1\text{H}\}$  NMR (162 MHz,  $\text{CDCl}_3$ )  $\delta$  37.60; HRMS (APCI)  $m/z$  ( $[\text{M}+\text{H}]^+$ ) calcd for  $\text{C}_{30}\text{H}_{26}\text{OP}$ : 433.1716, found: 433.1713.

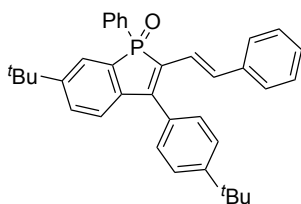

**(E)-6-(tert-Butyl)-3-(4-(tert-butyl)phenyl)-1-phenyl-2-styrylphosphindole 1-oxide (3ca):** Purified by silica gel column chromatography with hexane/ethyl acetate (2/1, v/v): 30 mg (58%, 0.10 mmol scale); Yellow solid; m.p. 124.5-126.1 °C;  $^1\text{H}$  NMR (400 MHz,  $\text{CDCl}_3$ )  $\delta$  7.88-7.82 (m, 2H), 7.72 (dd,  $J = 10.8, 1.72$  Hz, 1H), 7.57 (d,  $J = 8.5$  Hz, 2H), 7.51-7.44 (m, 4H), 7.40 (d,  $J = 8.2$  Hz, 2H), 7.29-7.12 (m, 7H), 6.94 (dd,  $J = 23.6, 16.4$  Hz, 1H), 1.42 (s, 9H), 1.28 (s, 9H);  $^{13}\text{C}\{^1\text{H}\}$  NMR (100 MHz,  $\text{CDCl}_3$ )  $\delta$  152.7 (d,  $J = 9.3$  Hz, 1C), 152.1 (1C), 149.6 (d,  $J = 21.2$  Hz, 1C), 141.1 (d,  $J = 26.1$  Hz, 1C), 137.2 (1C), 134.5 (d,  $J = 5.3$  Hz, 1C), 132.3 (d,  $J = 105.5$  Hz, 1C), 132.1 (d,  $J = 2.8$  Hz, 1C), 131.8 (d,  $J = 96.3$  Hz, 1C), 131.1 (d,  $J = 98.4$  Hz, 1C), 130.9 (d,  $J = 10.9$  Hz, 2C), 130.6 (d,  $J = 14.4$  Hz, 1C), 129.9 (d,  $J = 1.6$  Hz, 1C), 129.0 (2C), 128.9 (1C), 128.8 (1C), 128.4 (2C), 127.9 (1C), 126.8 (2C), 126.0 (d,  $J = 10.0$  Hz, 1C), 125.7 (2C), 123.7 (d,  $J = 11.4$  Hz, 1C), 121.3 (d,  $J = 9.4$  Hz, 1C), 35.1 (1C), 34.9 (1C), 31.4 (3C), 31.2 (3C);  $^{31}\text{P}\{^1\text{H}\}$  NMR (162 MHz,  $\text{CDCl}_3$ )  $\delta$  38.09; HRMS (APCI)  $m/z$  ( $[\text{M}+\text{H}]^+$ ) calcd for  $\text{C}_{36}\text{H}_{38}\text{OP}$ : 517.2655, found: 517.2662.

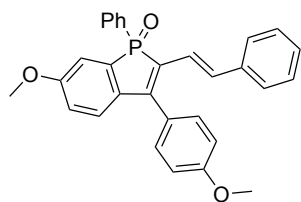

**(E)-6-Methoxy-3-(4-methoxyphenyl)-1-phenyl-2-styrylphosphindole 1-oxide (3da):** Purified by silica gel column chromatography with hexane/ethyl acetate (1/1, v/v): 35 mg (74%, 0.10 mmol scale); Yellow solid; m.p. 94.5-96.2 °C;  $^1\text{H}$  NMR (400 MHz,  $\text{CDCl}_3$ )  $\delta$  7.87-7.81 (m, 2H), 7.54-7.42 (m, 3H), 7.40 (d,  $J = 8.6$  Hz, 2H), 7.27-7.13 (m, 7H), 7.083 (d,  $J = 8.8$  Hz, 2H), 7.078 (d,  $J = 16.3$  Hz, 1H), 6.92 (dd,  $J = 8.6, 0.76$  Hz, 1H), 6.89 (dd,  $J = 24.0, 16.4$  Hz, 1H), 3.92 (s, 3H), 3.80 (s, 3H);  $^{13}\text{C}\{^1\text{H}\}$  NMR (100 MHz,  $\text{CDCl}_3$ )  $\delta$  160.7 (d,  $J = 13.4$  Hz, 1C), 160.1 (1C), 149.7 (d,  $J = 21.2$  Hz, 1C), 137.2 (1C), 136.1 (d,  $J = 25.7$  Hz, 1C), 134.6 (d,  $J = 104.4$  Hz, 1C), 133.5 (d,  $J = 5.3$  Hz, 1C), 132.2 (d,  $J = 2.8$  Hz, 1C), 130.9 (d,  $J = 98.6$  Hz, 1C), 130.8 (d,  $J = 10.8$  Hz, 2C), 130.6 (2C), 130.1 (d,  $J = 97.9$  Hz, 1C), 129.0 (1C), 128.9 (1C), 128.5 (2C), 127.8 (1C), 126.6 (2C), 125.9 (d,  $J = 14.7$  Hz, 1C), 125.0 (d,  $J = 12.5$  Hz, 1C), 121.3 (d,  $J = 9.7$  Hz, 1C), 118.1 (d,  $J = 1.4$  Hz, 1C), 114.5 (d,  $J = 11.0$  Hz, 1C), 114.2

(2C), 55.7 (1C), 55.4 (1C);  $^{31}\text{P}\{^1\text{H}\}$  NMR (162 MHz,  $\text{CDCl}_3$ )  $\delta$  37.29; HRMS (APCI)  $m/z$  ( $[\text{M}+\text{H}]^+$ ) calcd for  $\text{C}_{30}\text{H}_{26}\text{O}_3\text{P}$ : 465.1614, found: 465.1614.

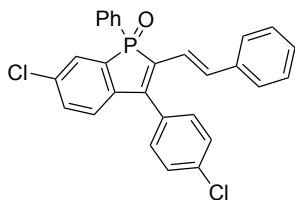

**(E)-6-Chloro-3-(4-chlorophenyl)-1-phenyl-2-styrylphosphindole 1-oxide (3ea):** Purified by silica gel column chromatography with hexane/ethyl acetate (1/2, v/v): 42 mg (86%, 0.10 mmol scale); Yellow solid; m.p. 181.3-183.0 °C;  $^1\text{H}$  NMR (400 MHz,  $\text{CDCl}_3$ )  $\delta$  7.85-7.80 (m, 2H), 7.62 (dd,  $J = 10.0, 2.0$  Hz, 1H), 7.58-7.53 (m, 3H), 7.50-7.46 (m, 2H), 7.41-7.38 (m, 3H), 7.28-7.19 (m, 5H), 7.17 (dd,  $J = 16.3, 0.72$  Hz, 1H), 7.09 (dd,  $J = 8.2, 3.3$  Hz, 1H), 6.81 (dd,  $J = 24.0, 16.3$  Hz, 1H);  $^{13}\text{C}\{^1\text{H}\}$  NMR (100 MHz,  $\text{CDCl}_3$ )  $\delta$  147.2 (d,  $J = 20.1$  Hz, 1C), 141.4 (d,  $J = 25.3$  Hz, 1C), 136.5 (1C), 136.4 (d,  $J = 5.3$  Hz, 1C), 135.5 (d,  $J = 14.3$  Hz, 1C), 135.3 (1C), 134.4 (d,  $J = 103.6$  Hz, 1C), 133.6 (d,  $J = 95.0$  Hz, 1C), 132.9 (d,  $J = 1.7$  Hz, 1C), 132.7 (d,  $J = 2.8$  Hz, 1C), 131.6 (d,  $J = 14.5$  Hz, 1C), 130.7 (d,  $J = 10.9$  Hz, 2C), 130.6 (2C), 129.7 (d,  $J = 100.1$  Hz, 1C), 129.4 (2C), 129.4 (1C), 129.3 (1C), 129.1 (1C), 128.6 (3C), 126.9 (2C), 124.5 (d,  $J = 11.4$  Hz, 1C), 120.2 (d,  $J = 9.1$  Hz, 1C);  $^{31}\text{P}\{^1\text{H}\}$  NMR (162 MHz,  $\text{CDCl}_3$ )  $\delta$  36.60; HRMS (APCI)  $m/z$  ( $[\text{M}+\text{H}]^+$ ) calcd for  $\text{C}_{28}\text{H}_{20}\text{Cl}_2\text{OP}$ : 473.0623, found: 473.0632.

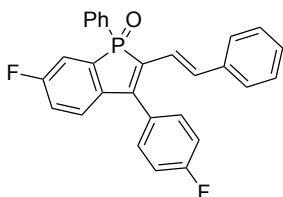

**(E)-6-Fluoro-3-(4-fluorophenyl)-1-phenyl-2-styrylphosphindole 1-oxide (3fa):** Purified by silica gel column chromatography with hexane/ethyl acetate (2/1, v/v) and GPC ( $\text{CHCl}_3$ ): 21 mg (47%, 0.10 mmol scale); Yellow solid; m.p. 234.7-236.3 °C;  $^1\text{H}$  NMR (400 MHz,  $\text{CDCl}_3$ )  $\delta$  7.85-7.80 (m, 2H), 7.58-7.53 (m, 1H), 7.50-7.41 (m, 4H), 7.40-7.36 (m, 1H), 7.30-7.09 (m, 10H), 6.80 (dd,  $J = 24.1, 16.4$  Hz, 1H);  $^{13}\text{C}\{^1\text{H}\}$  NMR (100 MHz,  $\text{CDCl}_3$ )  $\delta$  163.4 (dd,  $J = 251.7, 15.4$  Hz, 1C), 163.1 (d,  $J = 248.0$  Hz, 1C), 147.7 (dd,  $J = 20.8, 1.7$  Hz, 1C), 139.2 (dd,  $J = 25.3, 3.1$  Hz, 1C), 136.7 (1C), 135.6 (d,  $J = 5.8$  Hz, 1C), 135.0 (dd,  $J = 104.4, 6.6$  Hz, 1C), 133.1 (dd,  $J = 96.5, 3.6$  Hz, 1C), 132.6 (d,  $J = 2.9$  Hz, 1C), 131.1 (d,  $J = 7.9$  Hz, 2C), 130.7 (d,  $J = 10.8$  Hz, 2C), 129.8 (d,  $J = 99.8$  Hz, 1C), 129.3 (dd,  $J = 15.7, 2.4$  Hz, 1C), 129.2 (1C), 129.1 (1C), 128.6 (2C), 128.4 (1C), 126.8 (2C), 125.1 (dd,  $J = 12.3, 7.7$

Hz, 1C), 120.5 (d,  $J = 9.4$  Hz, 1C), 119.6 (d,  $J = 22.3$  Hz, 1C), 116.8 (dd,  $J = 23.8, 10.6$  Hz, 1C), 116.3 (d,  $J = 21.4$  Hz, 2C);  $^{19}\text{F}\{^1\text{H}\}$  NMR (376 MHz,  $\text{CDCl}_3$ )  $\delta$  -110.8 (d,  $J = 5.4$  Hz), -111.2;  $^{31}\text{P}\{^1\text{H}\}$  NMR (162 MHz,  $\text{CDCl}_3$ )  $\delta$  36.32 (d,  $J = 5.4$  Hz); HRMS (APCI)  $m/z$  ( $[\text{M}+\text{H}]^+$ ) calcd for  $\text{C}_{26}\text{H}_{20}\text{F}_2\text{OP}$ : 441.1214, found: 441.1221.

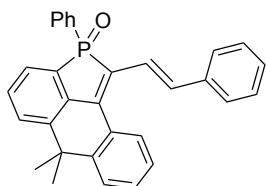

**(E)-6,6-Dimethyl-2-phenyl-1-styryl-6H-naphtho[1,2,3-cd]phosphindole 2-oxide (3ga):** Purified by GPC ( $\text{CHCl}_3$ ): 36 mg (80%, 0.10 mmol scale); Yellow solid; m.p. 119.5-121.1 °C;  $^1\text{H}$  NMR (400 MHz,  $\text{CDCl}_3$ )  $\delta$  8.12 (d,  $J = 7.5$  Hz, 1H), 7.80-7.73 (m, 3H), 7.67 (dd,  $J = 8.0$  Hz, 1H), 7.59 (dd,  $J = 22.5, 16.3$  Hz, 1H), 7.56 (dd,  $J = 9.44, 7.2$  Hz, 1H), 7.53-7.45 (m, 3H), 7.43-7.38 (m, 5H), 7.31 (m, 3H), 7.24 (t,  $J = 7.3$  Hz, 1H), 1.75 (s, 3H), 1.71 (s, 3H);  $^{13}\text{C}\{^1\text{H}\}$  NMR (100 MHz,  $\text{CDCl}_3$ )  $\delta$  147.2 (1C), 141.3 (d,  $J = 11.1$  Hz, 1C), 139.1 (d,  $J = 22.1$  Hz, 1C), 137.9 (d,  $J = 28.2$  Hz, 1C), 137.2 (d,  $J = 1.1$  Hz, 1C), 135.0 (d,  $J = 6.5$  Hz, 1C), 132.0 (d,  $J = 2.7$  Hz, 1C), 131.5 (d,  $J = 98.4$  Hz, 1C), 130.9 (d,  $J = 10.4$  Hz, 2C), 130.7 (d,  $J = 105.7$  Hz, 1C), 130.3 (1C), 130.0 (d,  $J = 1.8$  Hz, 1C), 129.5 (d,  $J = 11.4$  Hz, 1C), 129.0 (1C), 128.9 (1C), 128.8 (1C), 128.6 (2C), 128.5 (d,  $J = 16.6$  Hz, 1C), 128.1 (1C), 127.8 (d,  $J = 99.0$  Hz, 1C), 127.4 (1C), 127.1 (d,  $J = 9.4$  Hz, 1C), 126.8 (2C), 126.6 (1C), 122.1 (d,  $J = 8.0$  Hz, 1C), 39.0 (d,  $J = 1.1$  Hz, 1C), 33.1 (1C), 32.7 (1C);  $^{31}\text{P}\{^1\text{H}\}$  NMR (162 MHz,  $\text{CDCl}_3$ )  $\delta$  39.56; HRMS (APCI)  $m/z$  ( $[\text{M}+\text{H}]^+$ ) calcd for  $\text{C}_{31}\text{H}_{26}\text{OP}$ : 445.1716, found: 445.1731.

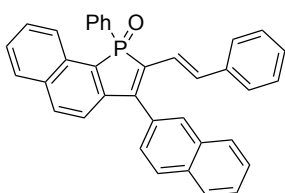

**(E)-3-(Naphthalen-2-yl)-1-phenyl-2-styrylbenzo[g]phosphindole 1-oxide (3ha):** Purified by silica gel column chromatography with hexane/ethyl acetate (2/1, v/v): 47 mg (92%, 0.10 mmol scale); Yellow solid; m.p. 152.9-154.6 °C;  $^1\text{H}$  NMR (400 MHz,  $\text{CDCl}_3$ )  $\delta$  8.14 (d,  $J = 8.1$  Hz, 1H), 8.07 (d,  $J = 8.4$  Hz, 1H), 8.00-7.92 (m, 6H), 7.81 (d,  $J = 7.9$  Hz, 1H), 7.64-7.58 (m, 3H), 7.52-7.42 (m, 5H), 7.38 (dd,  $J = 8.5, 2.6$  Hz, 1H), 7.31-7.13 (m, 6H), 6.96 (dd,  $J = 24.1, 16.3$  Hz, 1H);  $^{13}\text{C}\{^1\text{H}\}$  NMR (100 MHz,  $\text{CDCl}_3$ )  $\delta$  149.0 (d,  $J = 22.5$  Hz, 1C), 143.0 (d,  $J = 24.8$  Hz, 1C), 136.9 (1C), 135.2 (d,  $J = 5.1$  Hz,

1C), 134.1 (d,  $J = 95.2$  Hz, 1C), 133.8 (d,  $J = 2.0$  Hz, 1C), 133.6 (d,  $J = 8.4$  Hz, 1C), 133.4 (2C), 132.2 (d,  $J = 2.7$  Hz, 1C), 131.9 (d,  $J = 9.3$  Hz, 1C), 131.3 (d,  $J = 14.6$  Hz, 1C), 130.9 (d,  $J = 97.3$  Hz, 1C), 130.7 (d,  $J = 10.8$  Hz, 2C), 129.2 (1C), 129.1 (1C), 128.77 (1C), 128.76 (1C), 128.72 (1C), 128.5 (4C), 128.2 (1C), 128.0 (1C), 127.7 (d,  $J = 100.0$  Hz, 1C), 127.0 (1C), 126.9 (2C), 126.8 (3C), 125.6 (d,  $J = 5.0$  Hz, 1C), 121.3 (d,  $J = 12.2$  Hz, 1C), 120.9 (d,  $J = 10.3$  Hz, 1C);  $^{31}\text{P}\{^1\text{H}\}$  NMR (162 MHz,  $\text{CDCl}_3$ )  $\delta$  38.34; HRMS (APCI)  $m/z$  ( $[\text{M}+\text{H}]^+$ ) calcd for  $\text{C}_{36}\text{H}_{26}\text{OP}$ : 505.1716, found: 505.1733.

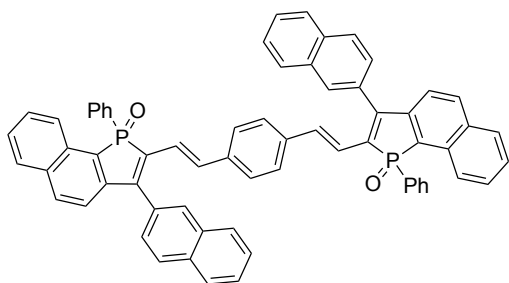

**2,2'-((1E,1'E)-1,4-Phenylenebis(ethene-2,1-diyl))bis(3-(naphthalen-2-yl)-1-phenylbenzo[g]phosphindole 1-oxide) (a 1:1 mixture of diastereomers) (3hm):** Purified by GPC ( $\text{CHCl}_3$ ): 29 mg (61%, 0.050 mmol scale); Red solid; m.p. 229.8-230.8 °C;  $^1\text{H}$  NMR (400 MHz,  $\text{CDCl}_3$ )  $\delta$  8.11 (d,  $J = 8.0$  Hz, 2H), 8.03 (dd,  $J = 8.4, 2.8$  Hz, 2H), 7.98-7.89 (m, 12H), 7.80 (d,  $J = 7.9$  Hz, 2H), 7.63-7.54 (m, 6H), 7.49-7.41 (m, 10H), 7.36 (dd,  $J = 8.5, 1.8$  Hz, 2H), 7.17 (d,  $J = 16.2$  Hz, 2H), 7.07 (d,  $J = 2.2$  Hz, 4H), 6.89 (dd,  $J = 24.1, 16.3$  Hz, 2H);  $^{13}\text{C}\{^1\text{H}\}$  NMR (100 MHz,  $\text{CDCl}_3$ )  $\delta$  149.2 (d,  $J = 22.5$  Hz, 2C), 143.0 (d,  $J = 24.8$  Hz, 2C), 136.9 (2C), 134.5 (d,  $J = 5.4$  Hz, 2C), 134.1 (d,  $J = 94.4$  Hz, 2C), 133.8 (2C), 133.6 (d,  $J = 9.0$  Hz, 2C), 133.34 (2C), 133.30 (2C), 132.3 (2C), 131.9 (d,  $J = 9.1$  Hz, 2C), 131.2 (d,  $J = 14.7$  Hz, 2C), 130.9 (d,  $J = 97.6$  Hz, 2C), 130.7 (d,  $J = 10.8$  Hz, 4C), 129.2 (2C), 129.1 (2C), 128.8 (4C), 128.7 (2C), 128.5 (2C), 128.3 (2C), 128.0 (2C), 127.7 (d,  $J = 103.9$  Hz, 2C), 127.0 (6C), 126.8 (4C), 126.7 (2C), 125.5 (d,  $J = 4.9$  Hz, 2C), 121.3 (d,  $J = 12.1$  Hz, 2C), 121.2 (d,  $J = 9.8$  Hz, 2C);  $^{31}\text{P}\{^1\text{H}\}$  NMR (162 MHz,  $\text{CDCl}_3$ )  $\delta$  38.23, 38.21; HRMS (APCI)  $m/z$  ( $[\text{M}+\text{H}]^+$ ) calcd for  $\text{C}_{66}\text{H}_{45}\text{O}_2\text{P}_2$ : 931.2889, found: 931.2889.



$^1\text{H}$ ,  $^{13}\text{C}\{^1\text{H}\}$ , and  $^{31}\text{P}\{^1\text{H}\}$  NMR Spectra of **3aa**

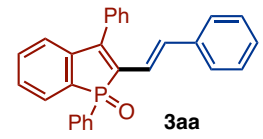

$^1\text{H}$  NMR  
(400 MHz,  $\text{CDCl}_3$ )

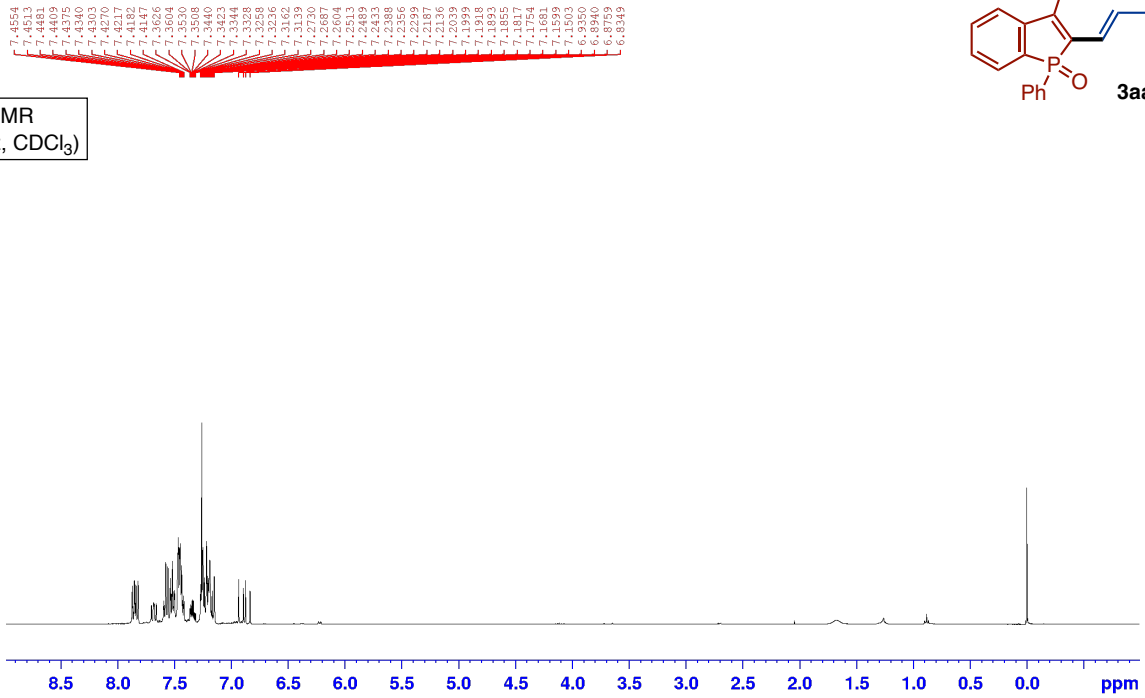

$^{13}\text{C}\{^1\text{H}\}$  NMR  
(100 MHz,  $\text{CDCl}_3$ )

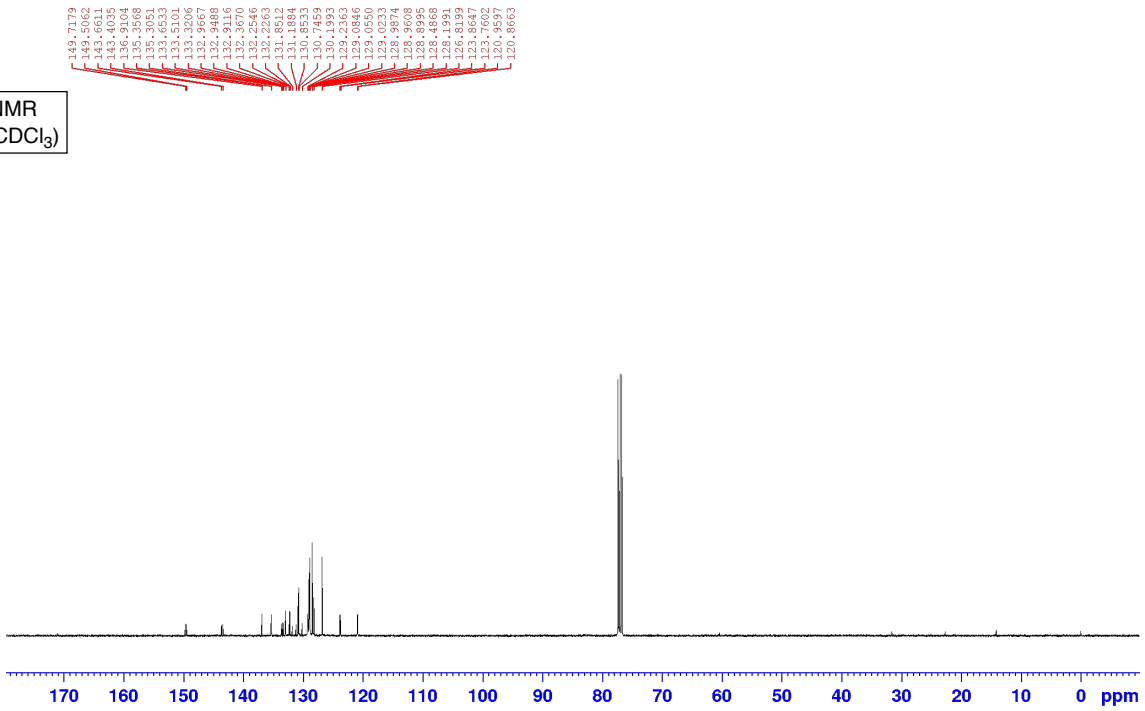

$^{31}\text{P}\{^1\text{H}\}$  NMR  
(162 MHz,  $\text{CDCl}_3$ )

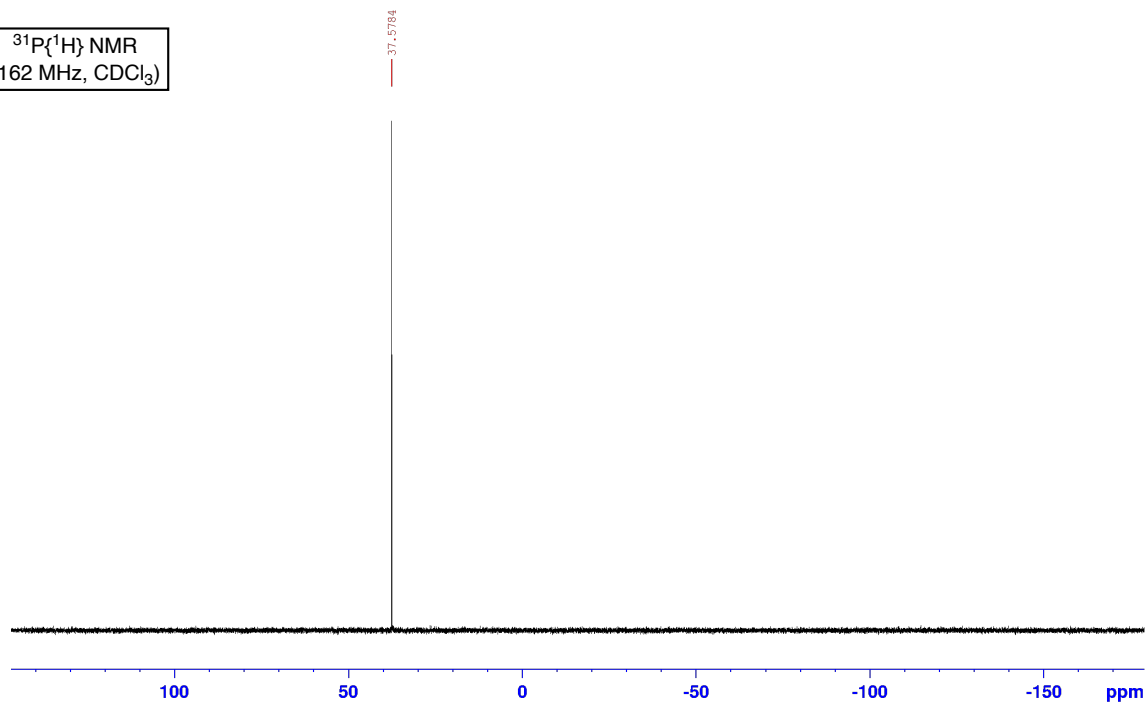



$^{31}\text{P}\{^1\text{H}\}$  NMR  
(162 MHz,  $\text{CDCl}_3$ )

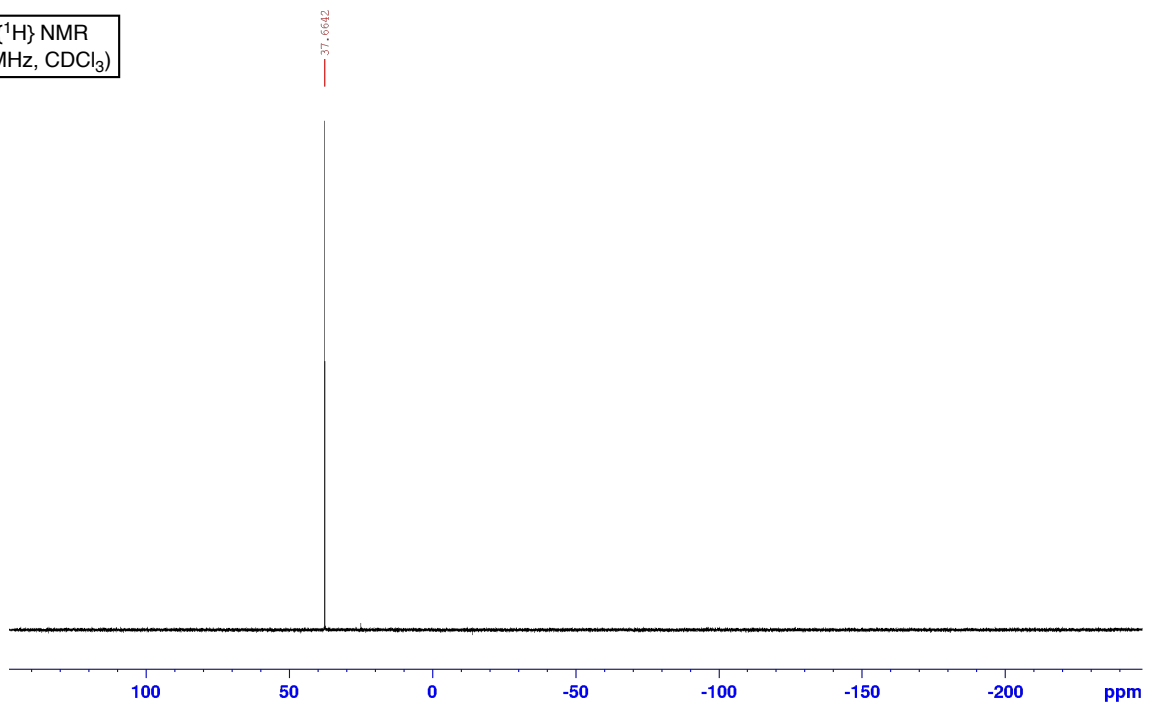

$^1\text{H}$ ,  $^{13}\text{C}\{^1\text{H}\}$ , and  $^{31}\text{P}\{^1\text{H}\}$  NMR Spectra of **3ac**

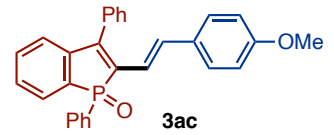

$^1\text{H}$  NMR  
(400 MHz,  $\text{CDCl}_3$ )

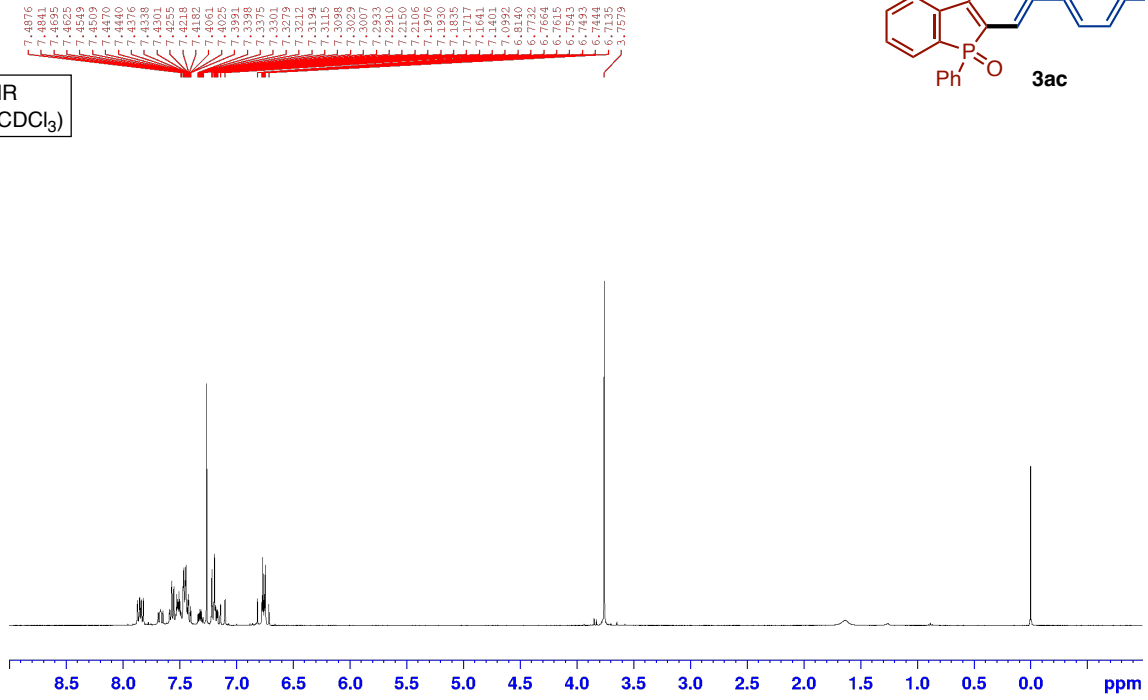

$^{13}\text{C}\{^1\text{H}\}$  NMR  
(100 MHz,  $\text{CDCl}_3$ )

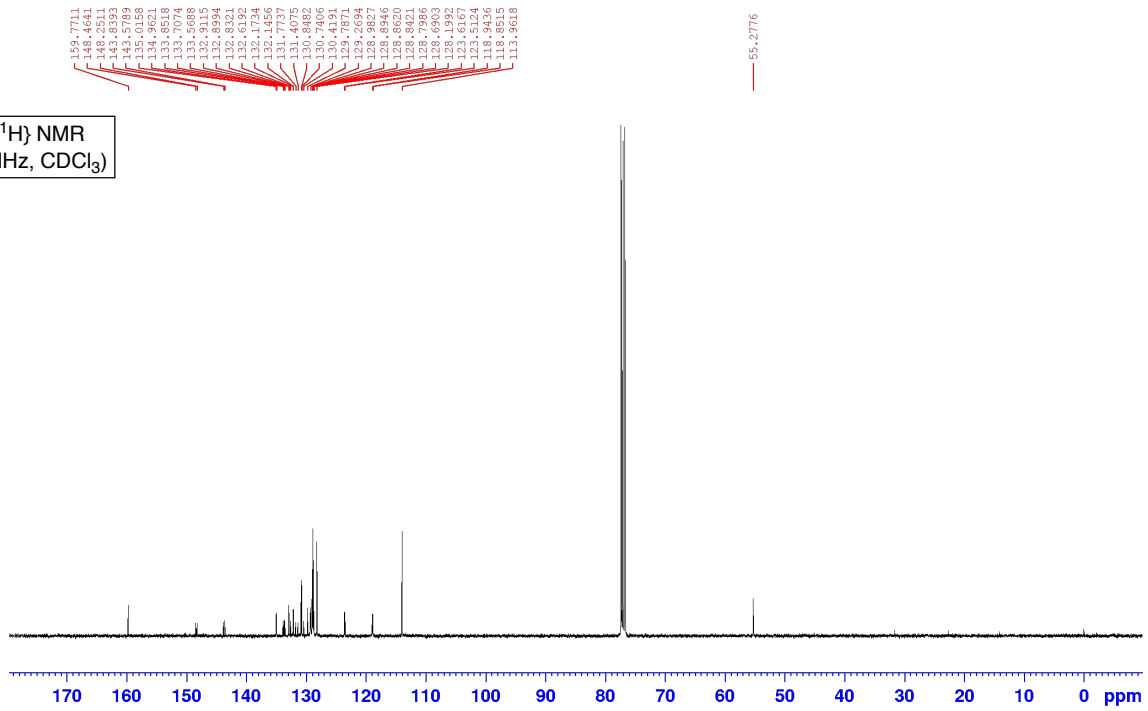

$^{31}\text{P}\{^1\text{H}\}$  NMR  
(162 MHz,  $\text{CDCl}_3$ )

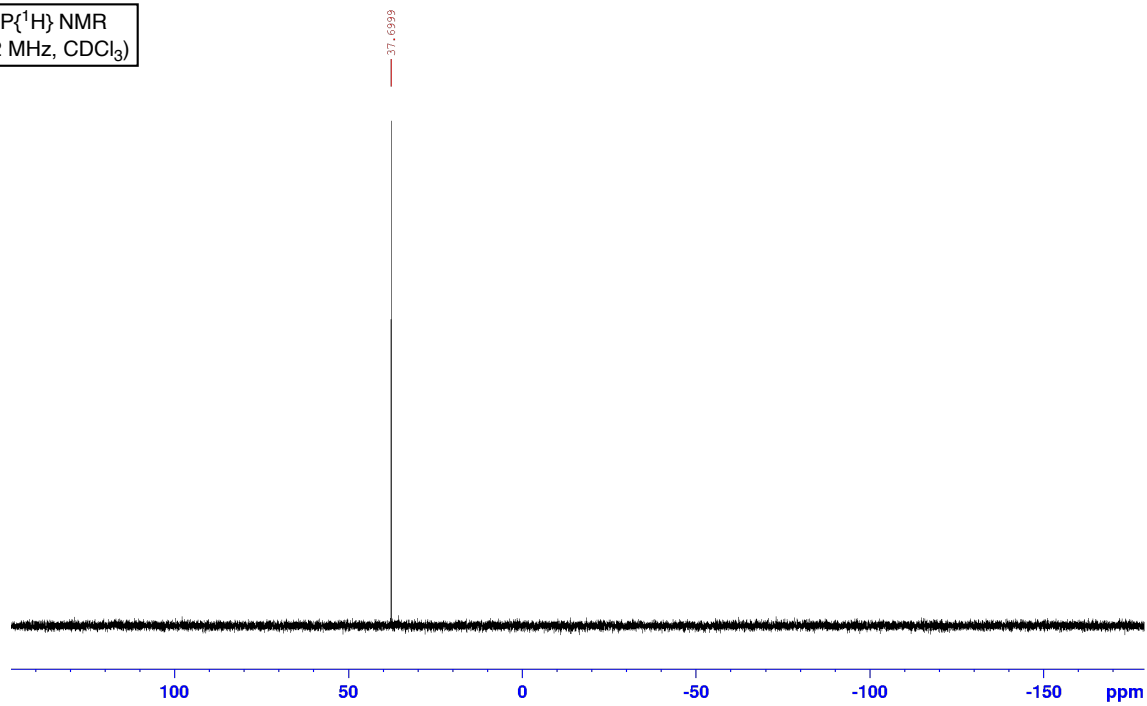

[<sup>1</sup>H, <sup>13</sup>C{<sup>1</sup>H}, <sup>19</sup>F{<sup>1</sup>H}, and <sup>31</sup>P{<sup>1</sup>H} NMR Spectra of **3ad**]

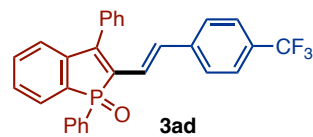

<sup>1</sup>H NMR  
(400 MHz, CDCl<sub>3</sub>)

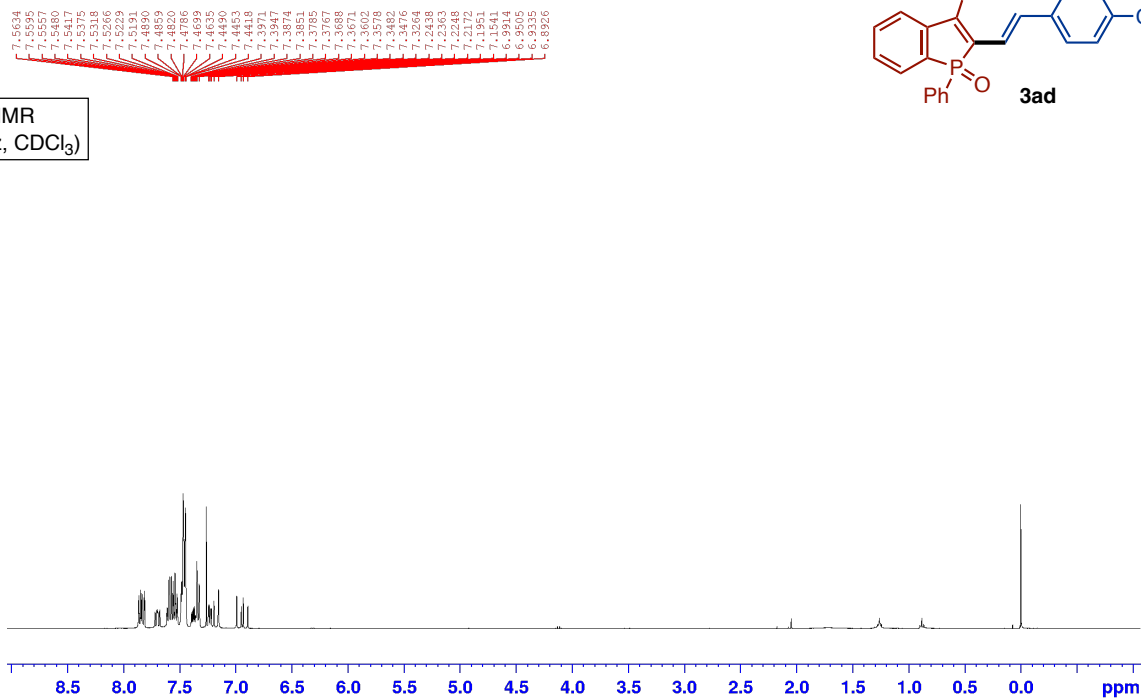

<sup>13</sup>C{<sup>1</sup>H} NMR  
(100 MHz, CDCl<sub>3</sub>)

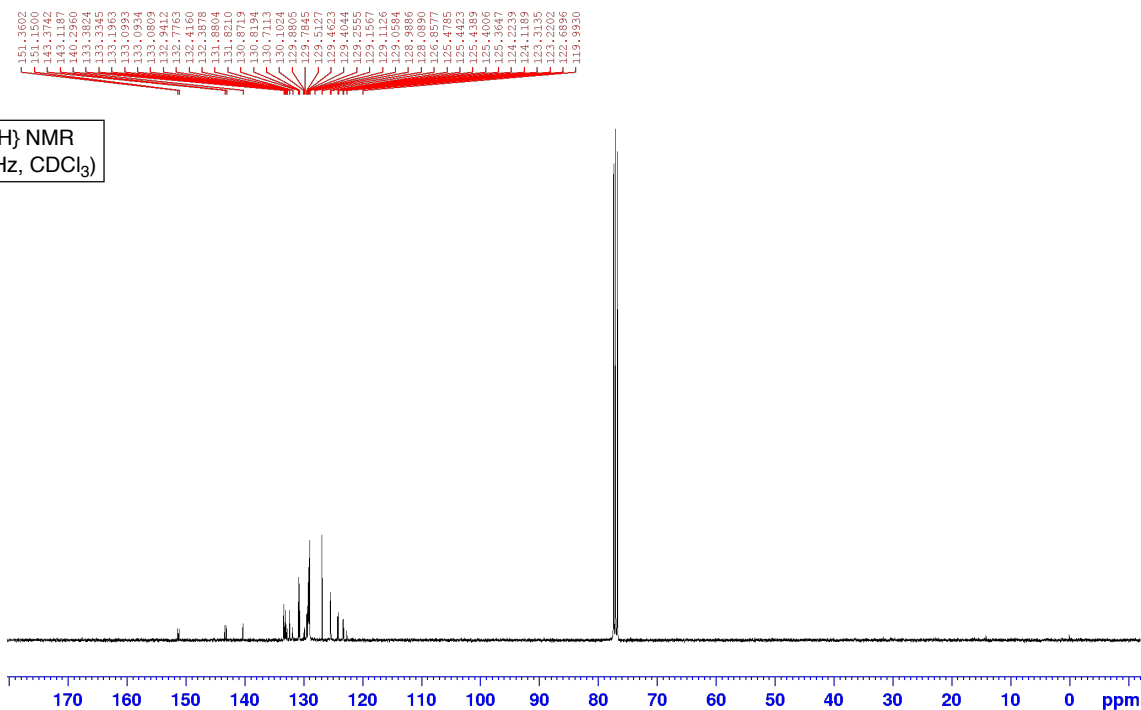

$^{19}\text{F}\{^1\text{H}\}$  NMR  
(376 MHz,  $\text{CDCl}_3$ )

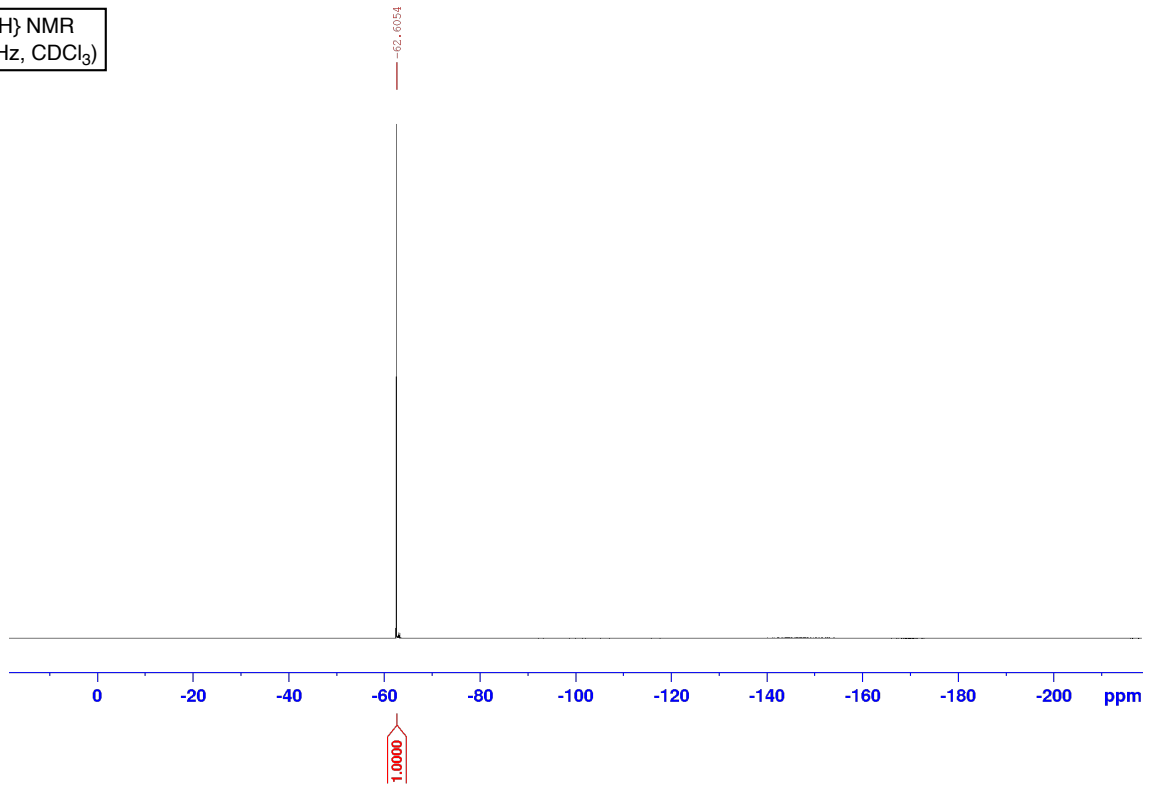

$^{31}\text{P}\{^1\text{H}\}$  NMR  
(162 MHz,  $\text{CDCl}_3$ )

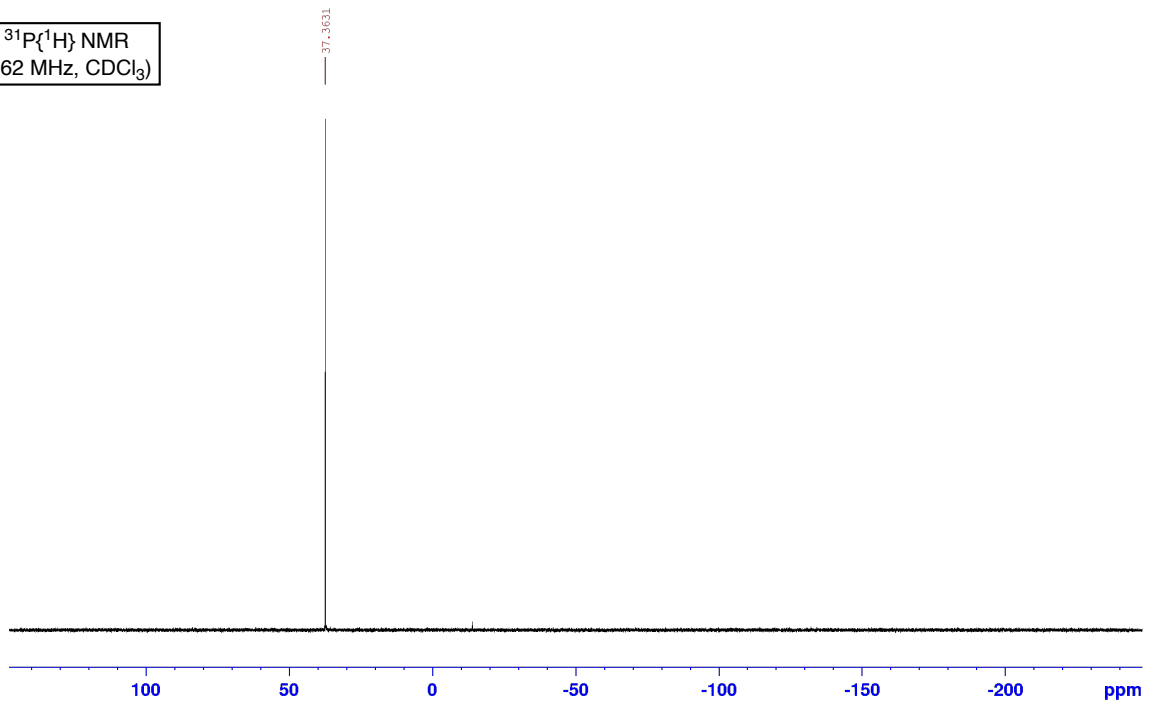



$[^1\text{H}, ^{13}\text{C}\{^1\text{H}\}, \text{ and } ^{31}\text{P}\{^1\text{H}\}]$  NMR Spectra of **3ae**

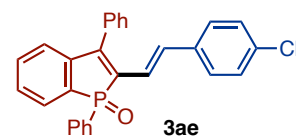

$^1\text{H}$  NMR  
(400 MHz,  $\text{CDCl}_3$ )

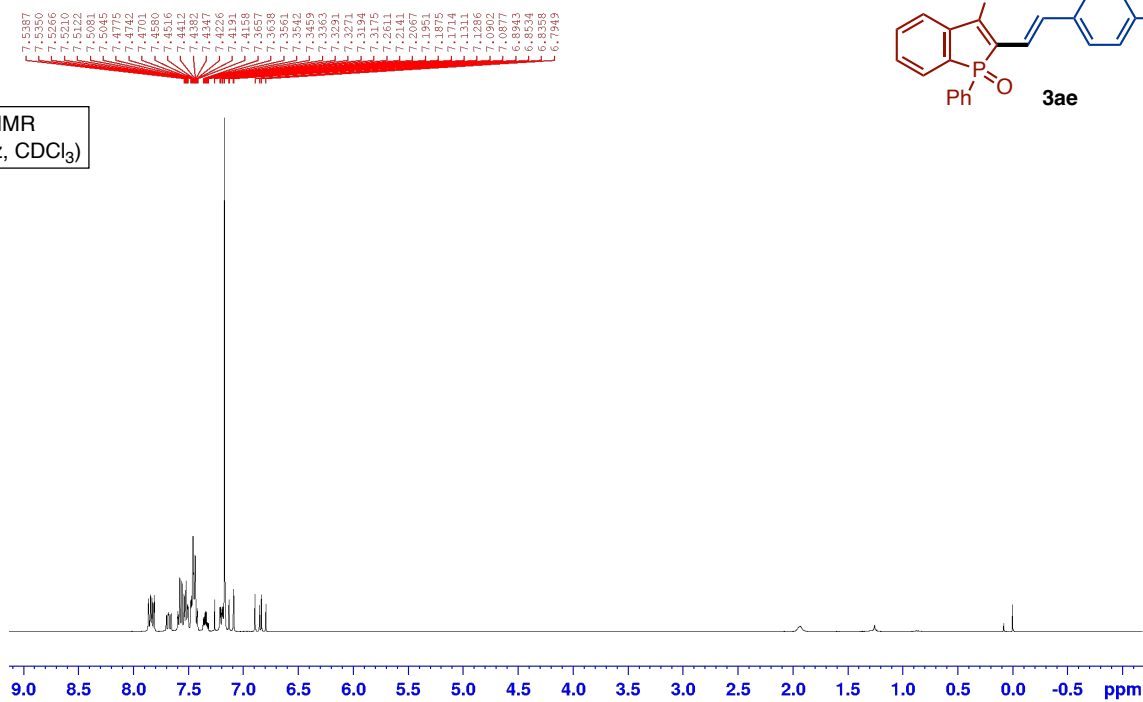

$^{13}\text{C}\{^1\text{H}\}$  NMR  
(100 MHz,  $\text{CDCl}_3$ )

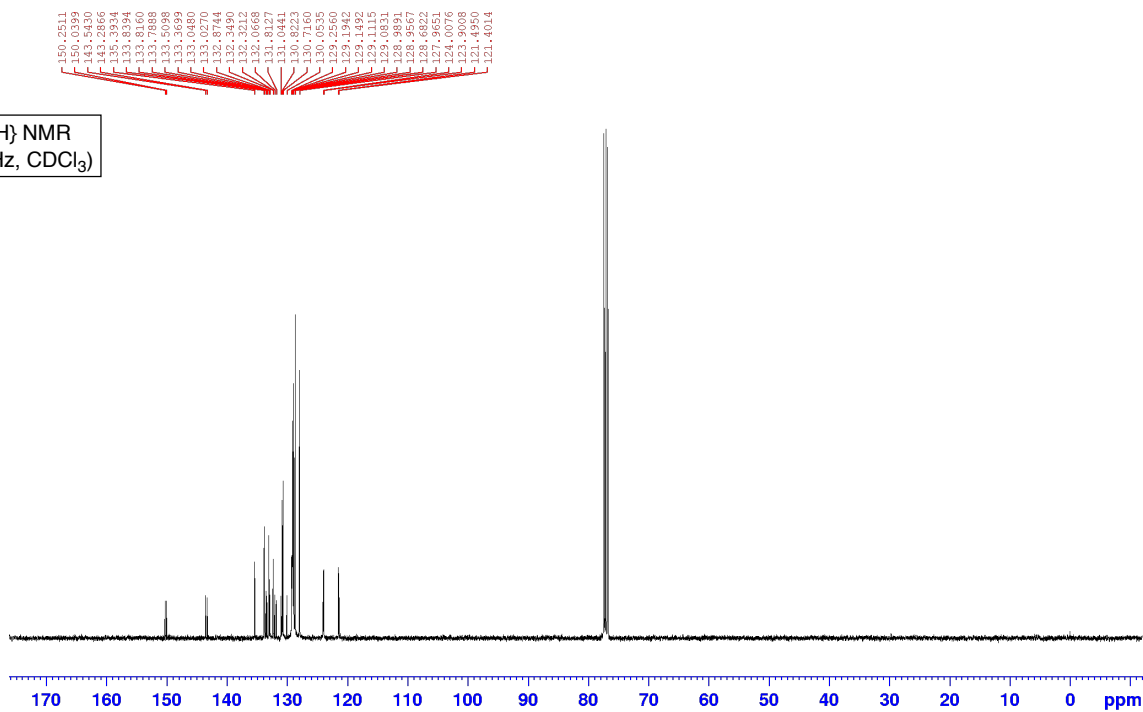

$^{31}\text{P}\{^1\text{H}\}$  NMR  
(162 MHz,  $\text{CDCl}_3$ )

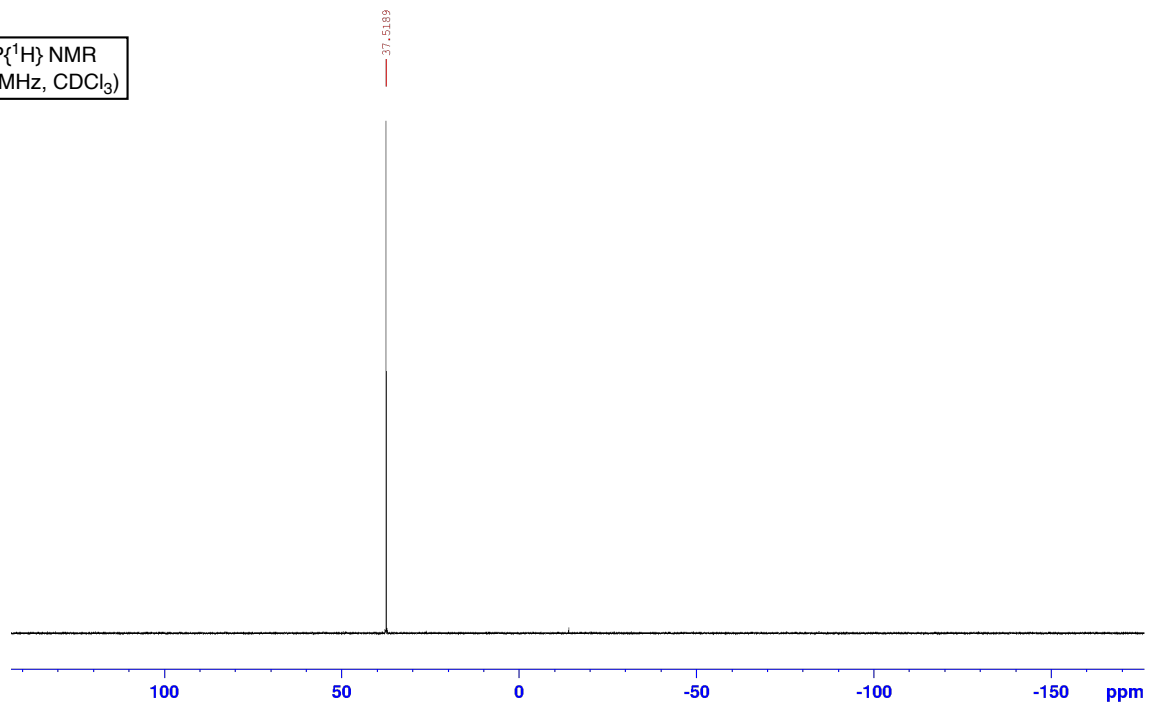

[<sup>1</sup>H, <sup>13</sup>C {<sup>1</sup>H}, and <sup>31</sup>P {<sup>1</sup>H} NMR Spectra of **3af**]

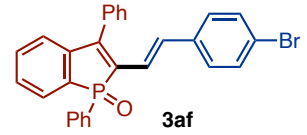

<sup>1</sup>H NMR  
(400 MHz, CDCl<sub>3</sub>)

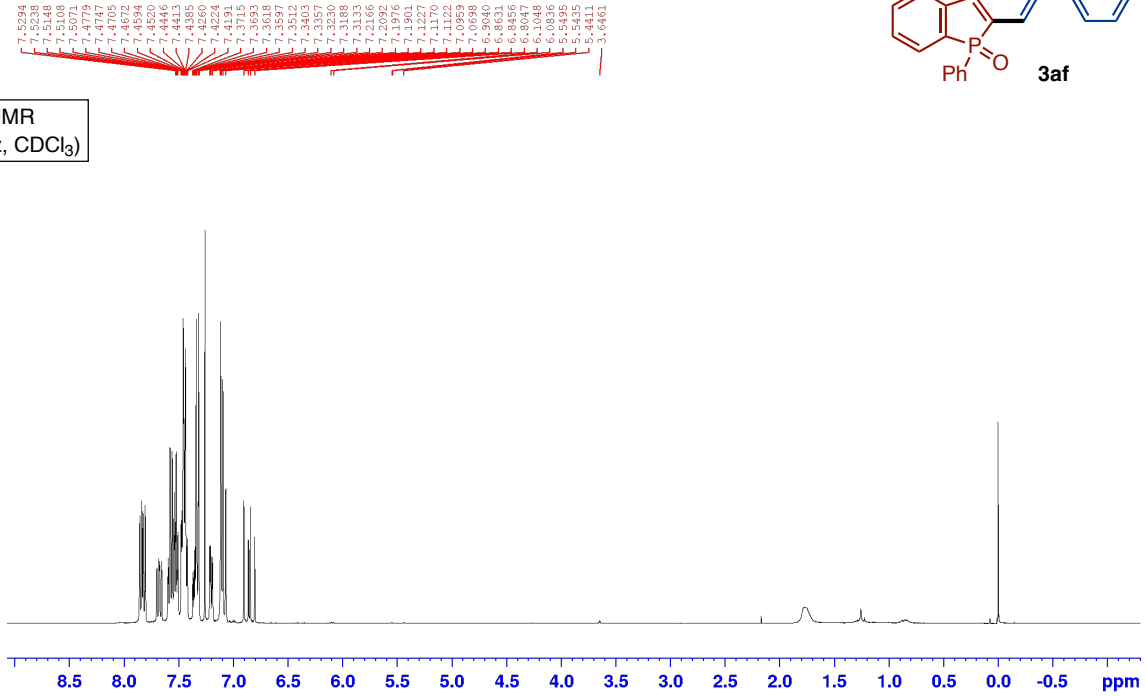

<sup>13</sup>C {<sup>1</sup>H} NMR  
(100 MHz, CDCl<sub>3</sub>)

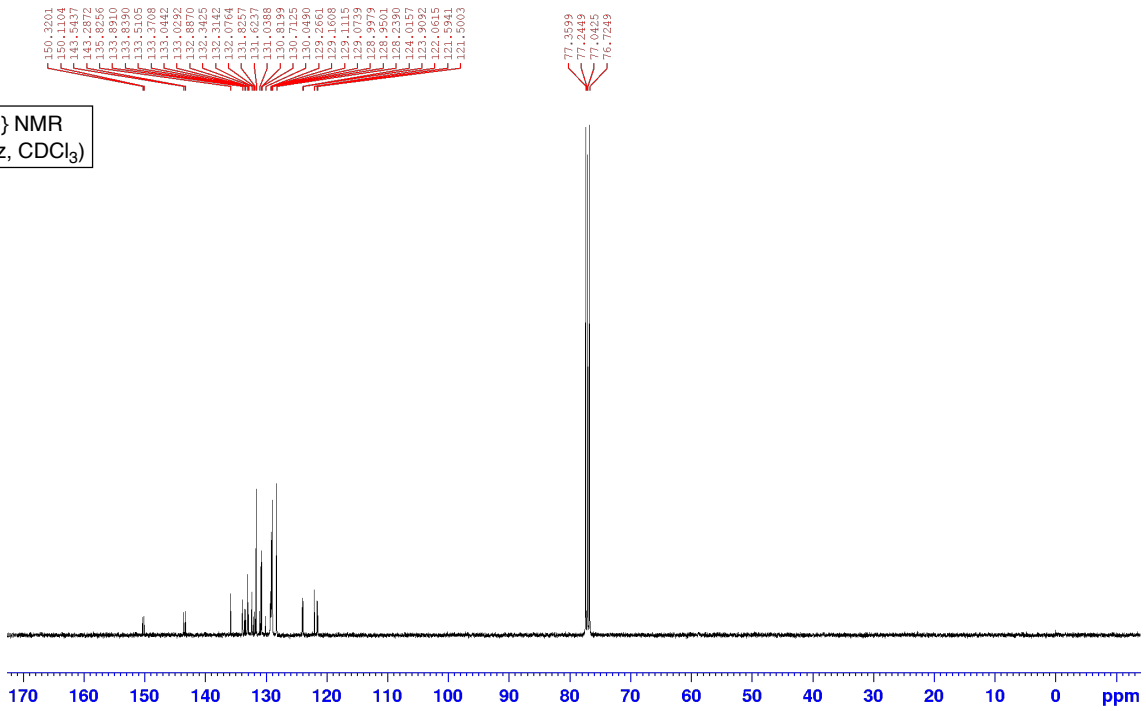

$^{31}\text{P}\{^1\text{H}\}$  NMR  
(162 MHz,  $\text{CDCl}_3$ )

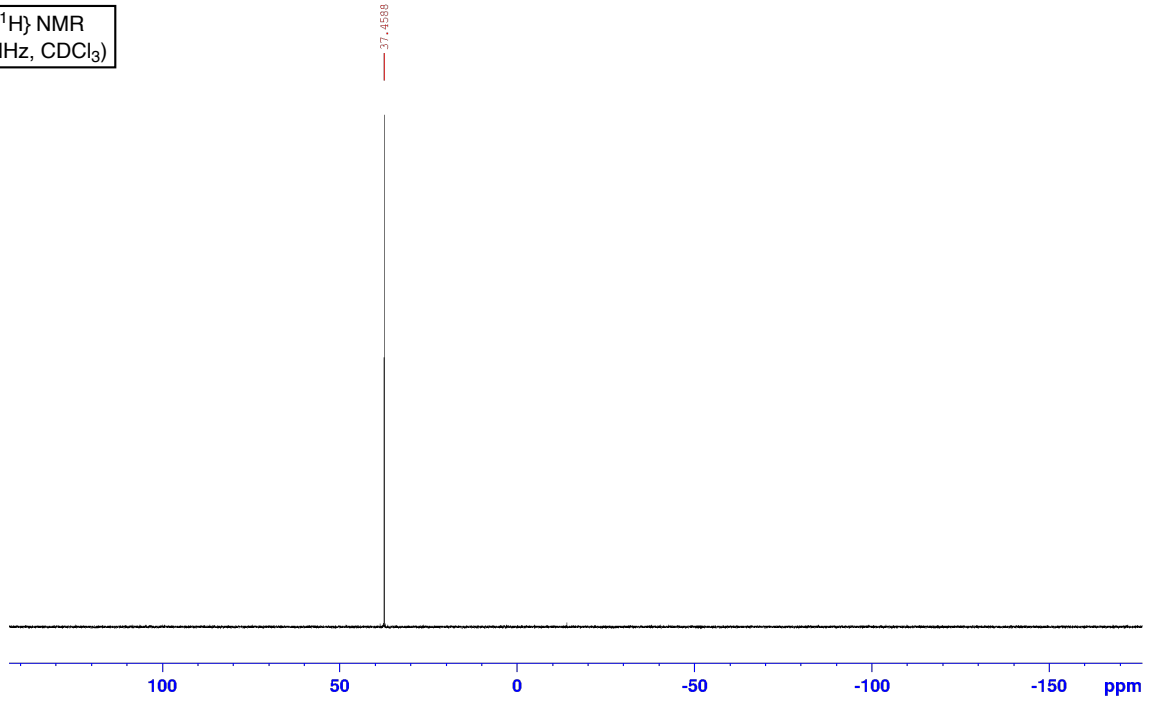

[<sup>1</sup>H, <sup>13</sup>C{<sup>1</sup>H}, and <sup>31</sup>P{<sup>1</sup>H} NMR Spectra of **3ag**]

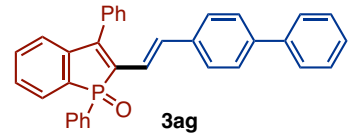

<sup>1</sup>H NMR  
(400 MHz, CDCl<sub>3</sub>)

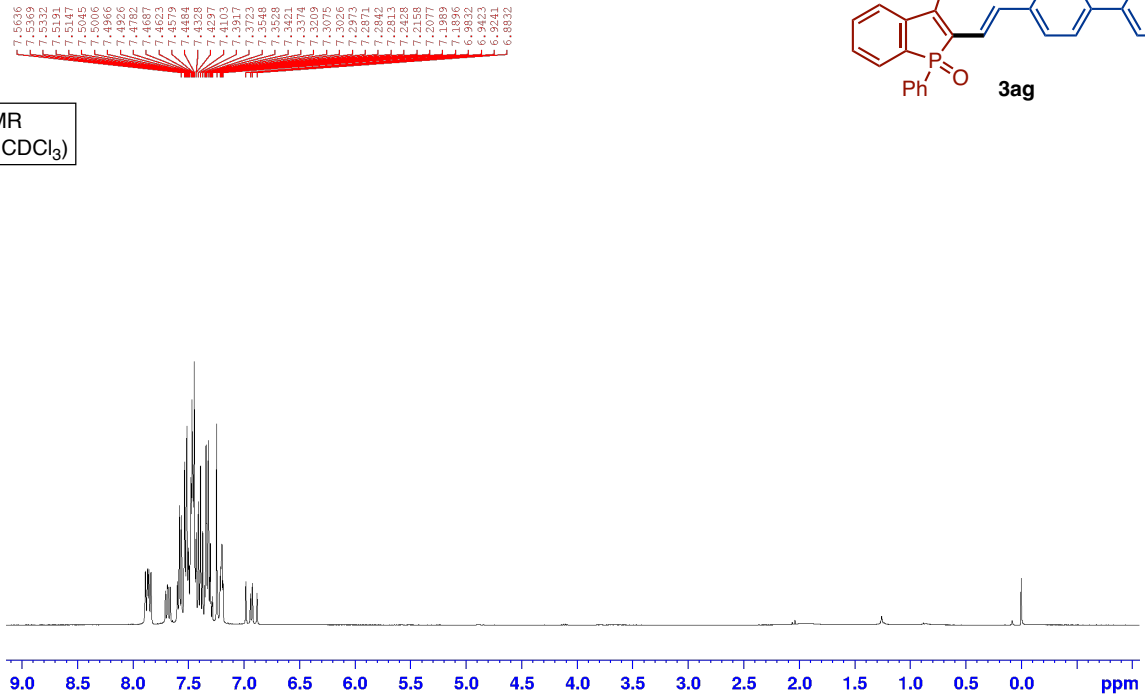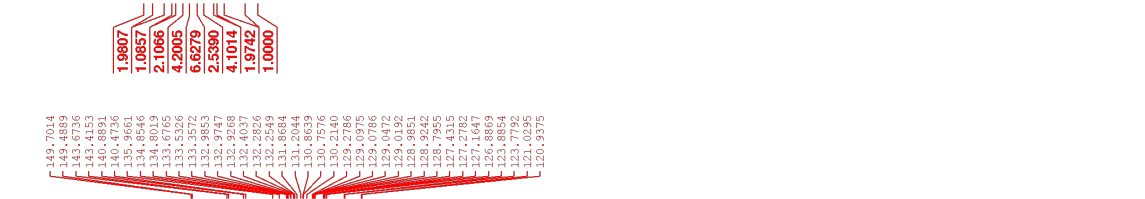

<sup>13</sup>C{<sup>1</sup>H} NMR  
(100 MHz, CDCl<sub>3</sub>)

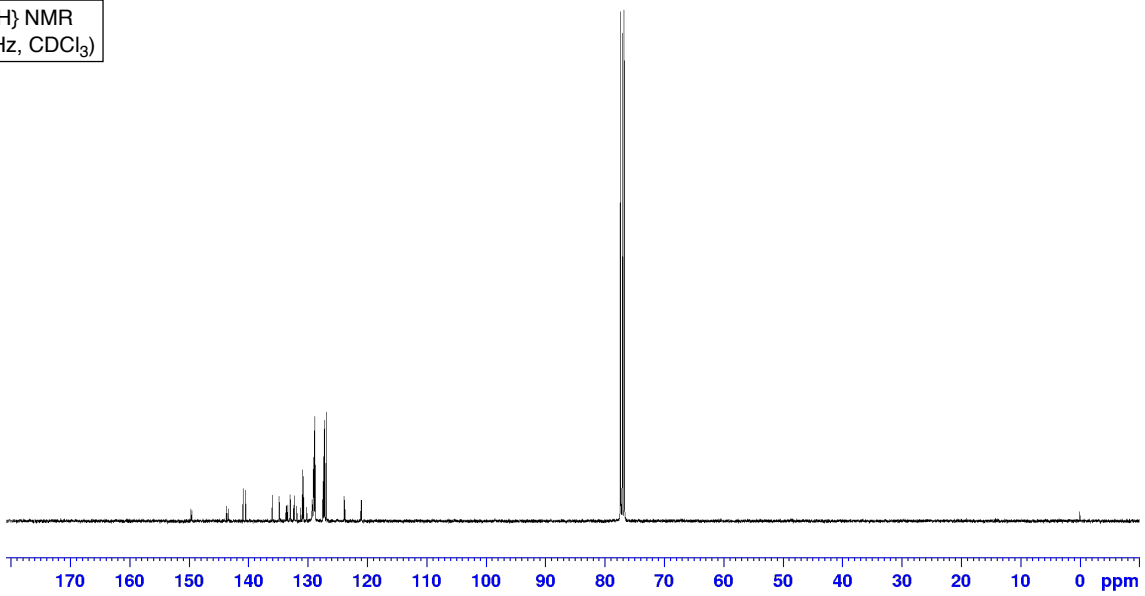

$^{31}\text{P}\{^1\text{H}\}$  NMR  
(162 MHz,  $\text{CDCl}_3$ )

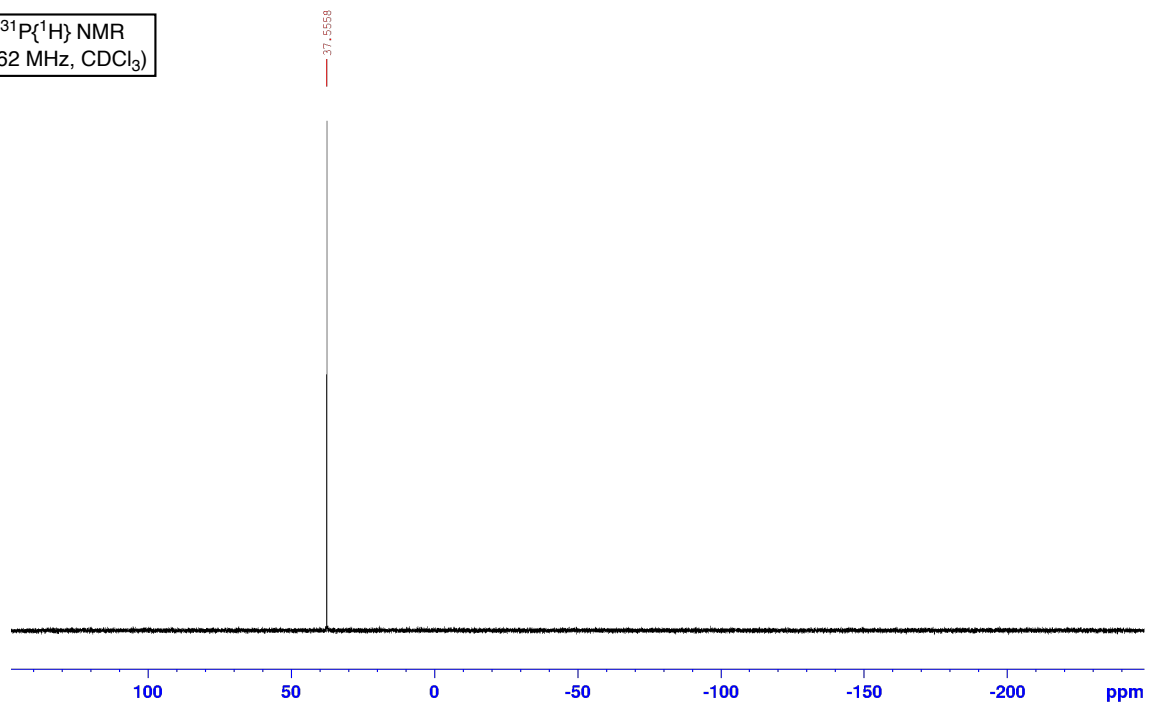

[<sup>1</sup>H, <sup>13</sup>C{<sup>1</sup>H}, and <sup>31</sup>P{<sup>1</sup>H} NMR Spectra of **3ah**]

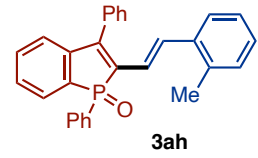

<sup>1</sup>H NMR  
(400 MHz, CDCl<sub>3</sub>)

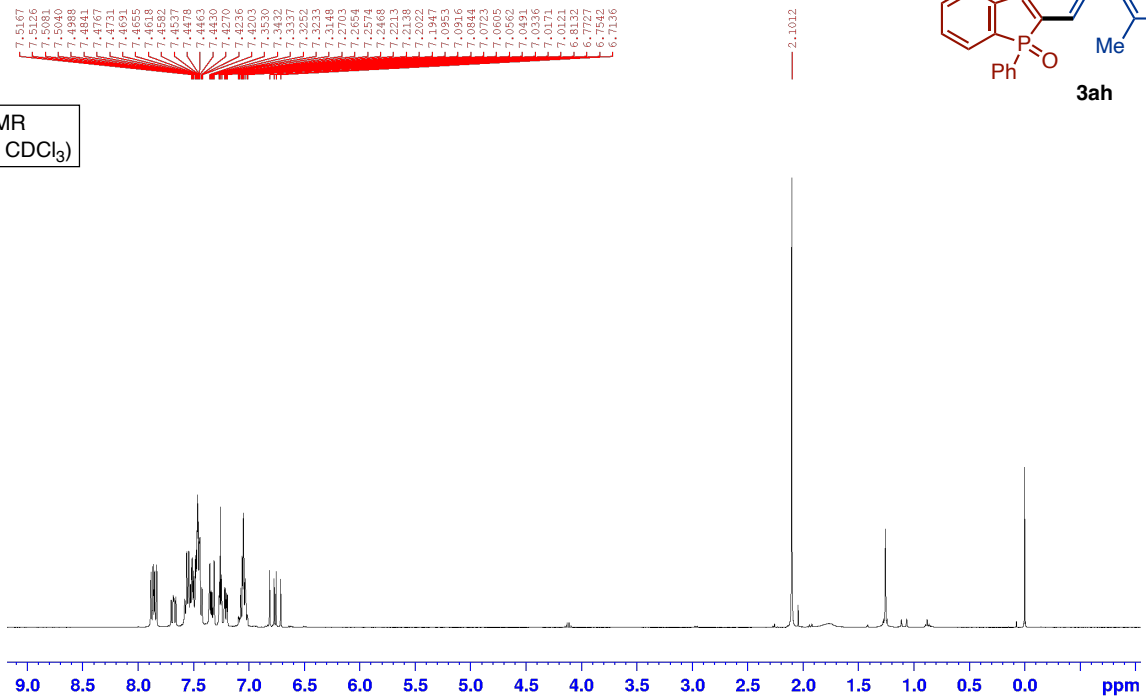

<sup>13</sup>C{<sup>1</sup>H} NMR  
(100 MHz, CDCl<sub>3</sub>)

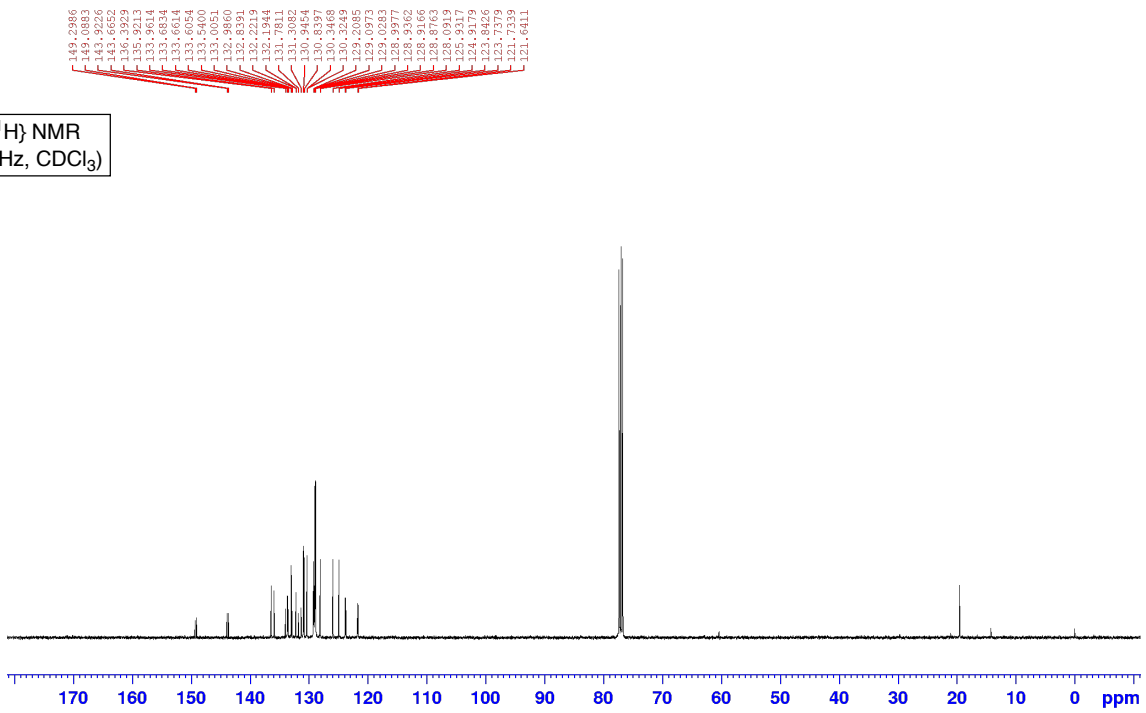

$^{31}\text{P}\{^1\text{H}\}$  NMR  
(162 MHz,  $\text{CDCl}_3$ )

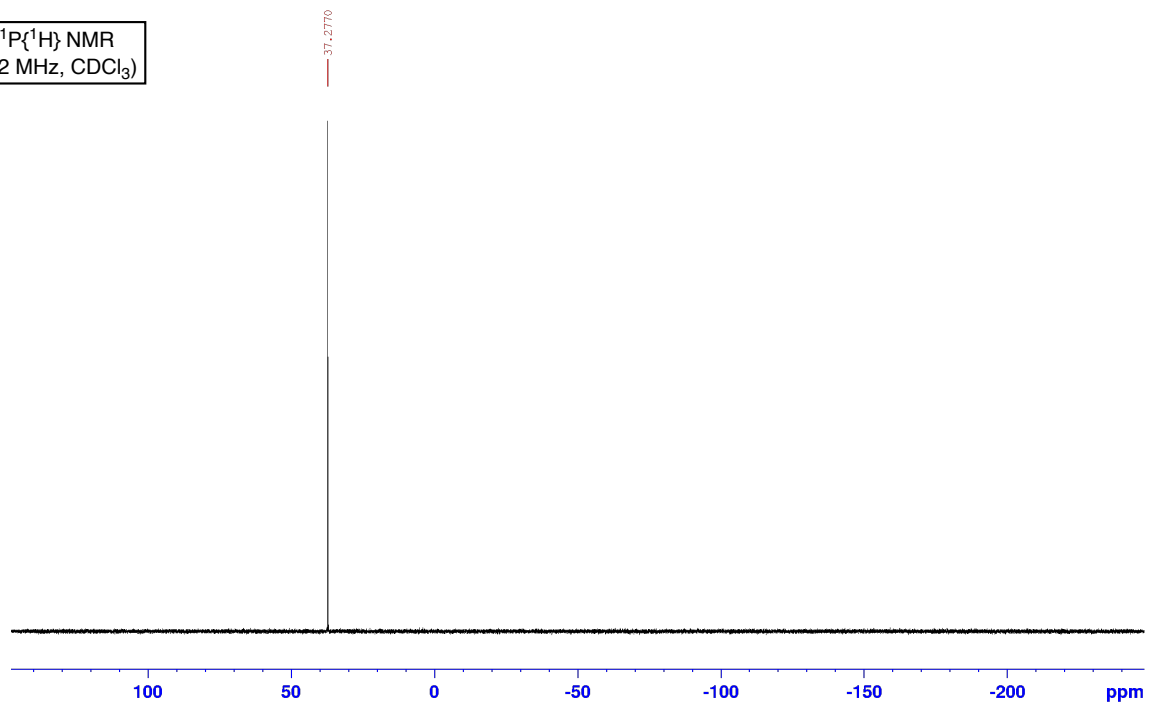



$^1\text{H}$ ,  $^{13}\text{C}\{^1\text{H}\}$ , and  $^{31}\text{P}\{^1\text{H}\}$  NMR Spectra of **3ai**

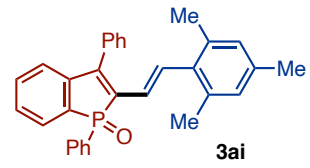

$^1\text{H}$  NMR  
(400 MHz,  $\text{CDCl}_3$ )

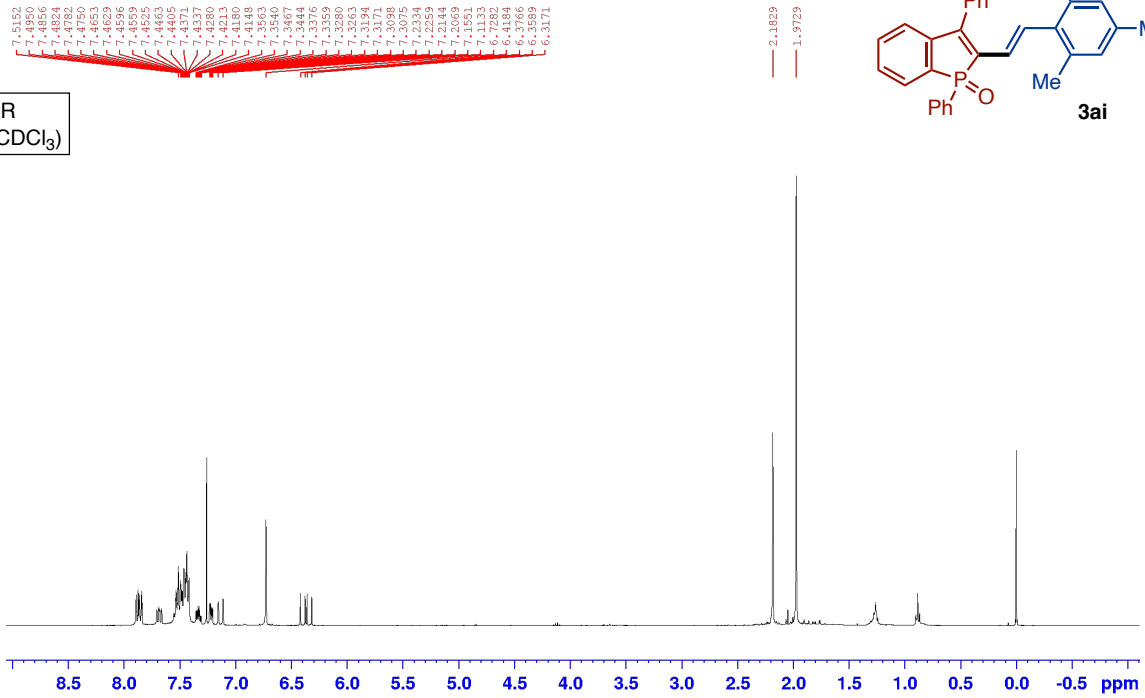

$^{13}\text{C}\{^1\text{H}\}$  NMR  
(100 MHz,  $\text{CDCl}_3$ )

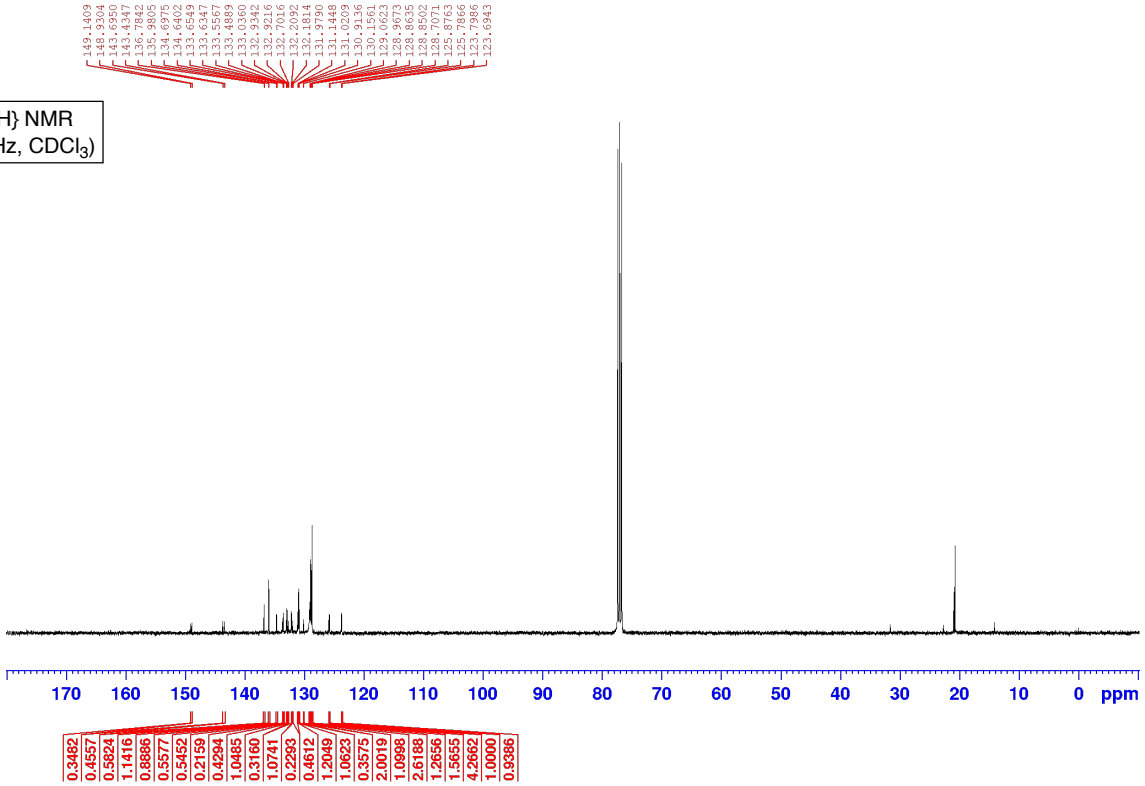

$^{31}\text{P}\{^1\text{H}\}$  NMR  
(162 MHz,  $\text{CDCl}_3$ )

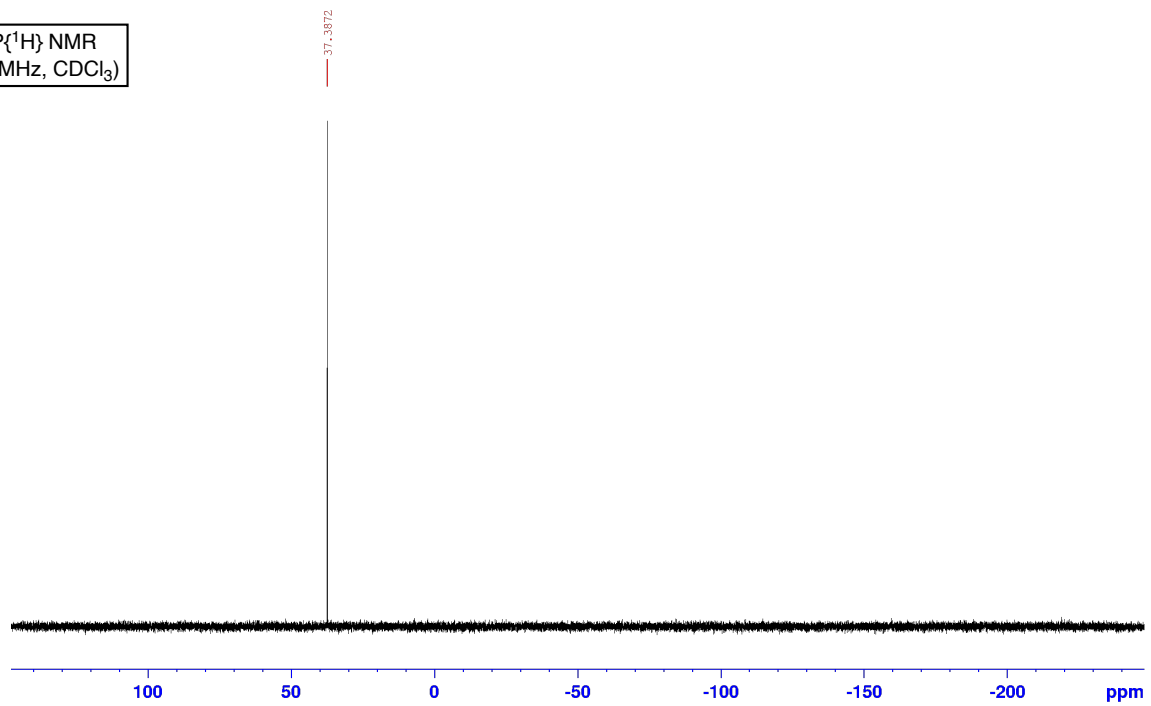

[ $^1\text{H}$ ,  $^{13}\text{C}\{^1\text{H}\}$ ,  $^{19}\text{F}\{^1\text{H}\}$ , and  $^{31}\text{P}\{^1\text{H}\}$  NMR Spectra of **3aj**]

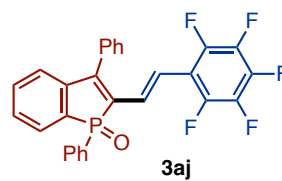

$^1\text{H}$  NMR  
(400 MHz,  $\text{CDCl}_3$ )

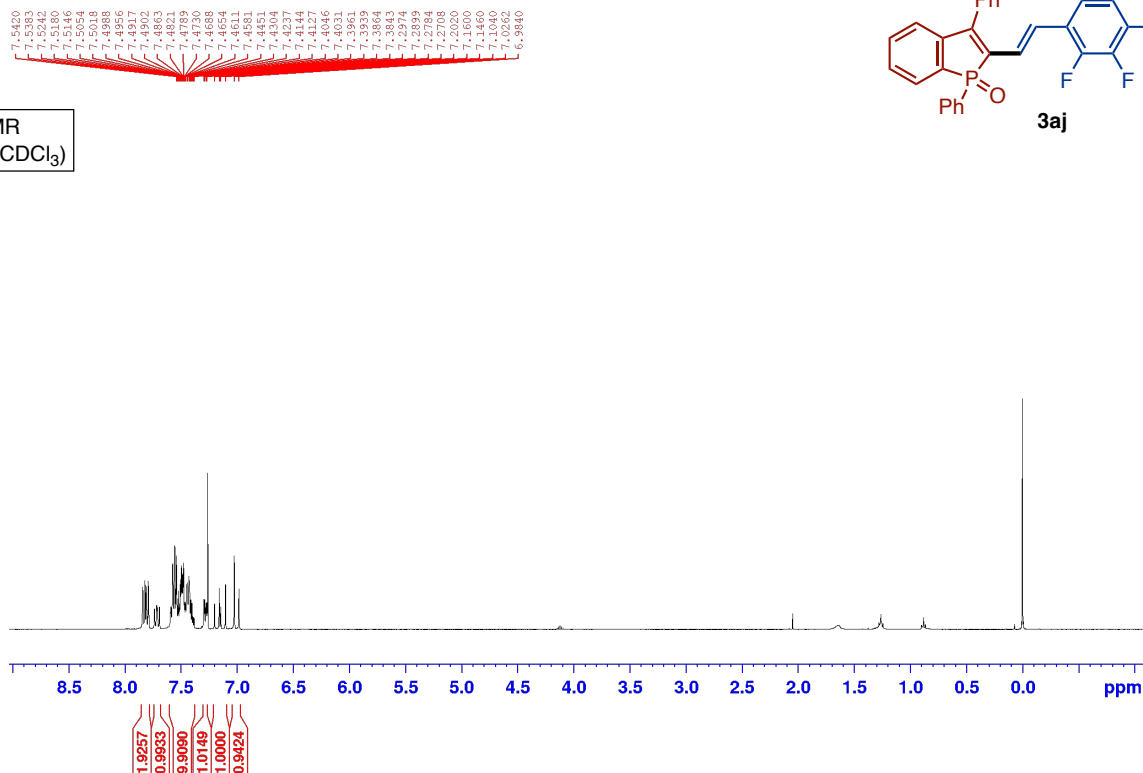

$^{13}\text{C}\{^1\text{H}\}$  NMR  
(100 MHz,  $\text{CDCl}_3$ )

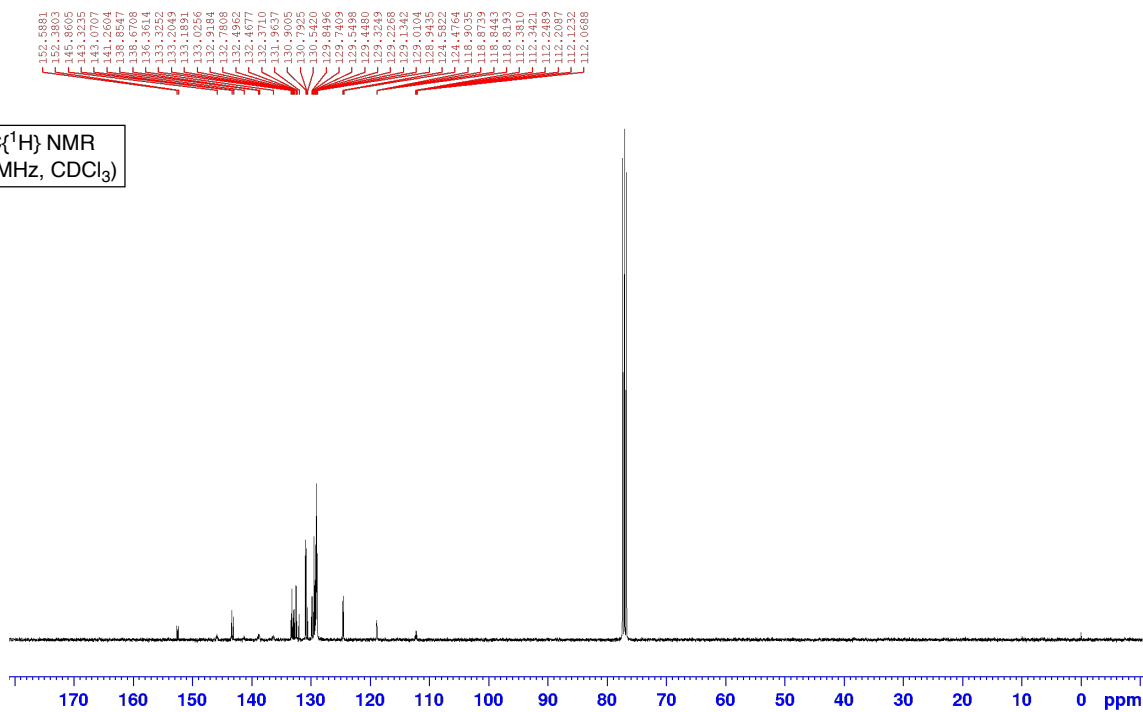

$^{19}\text{F}\{^1\text{H}\}$  NMR  
(376 MHz,  $\text{CDCl}_3$ )

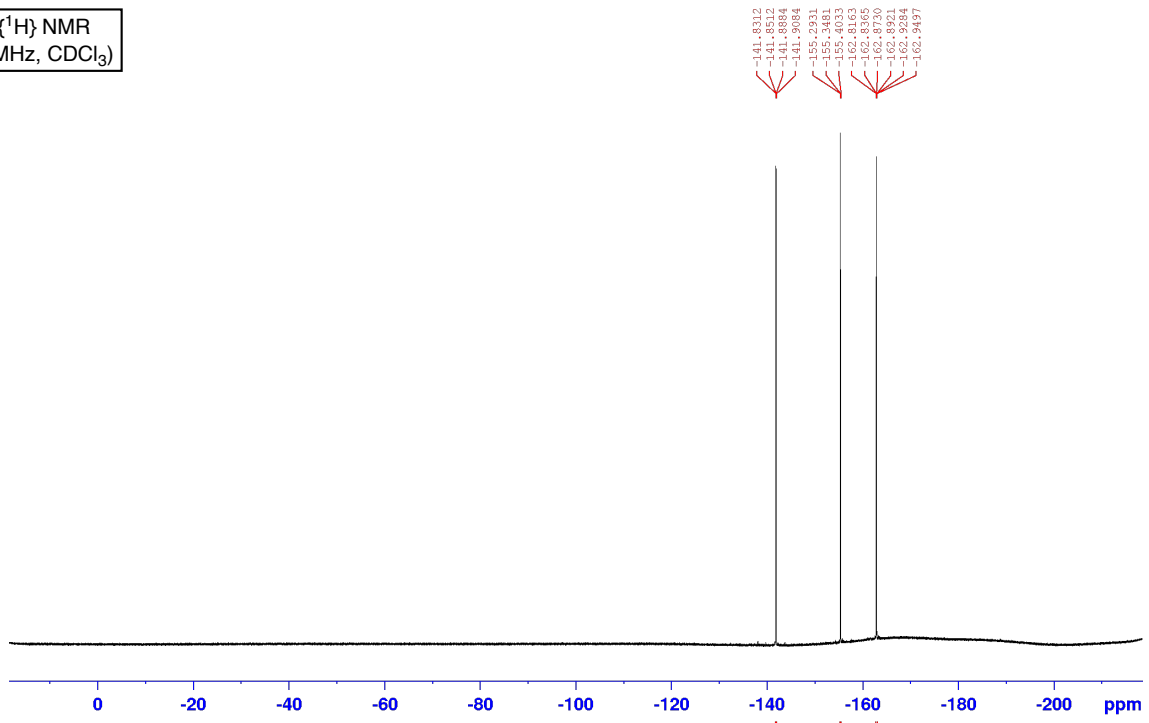

$^{31}\text{P}\{^1\text{H}\}$  NMR  
(162 MHz,  $\text{CDCl}_3$ )

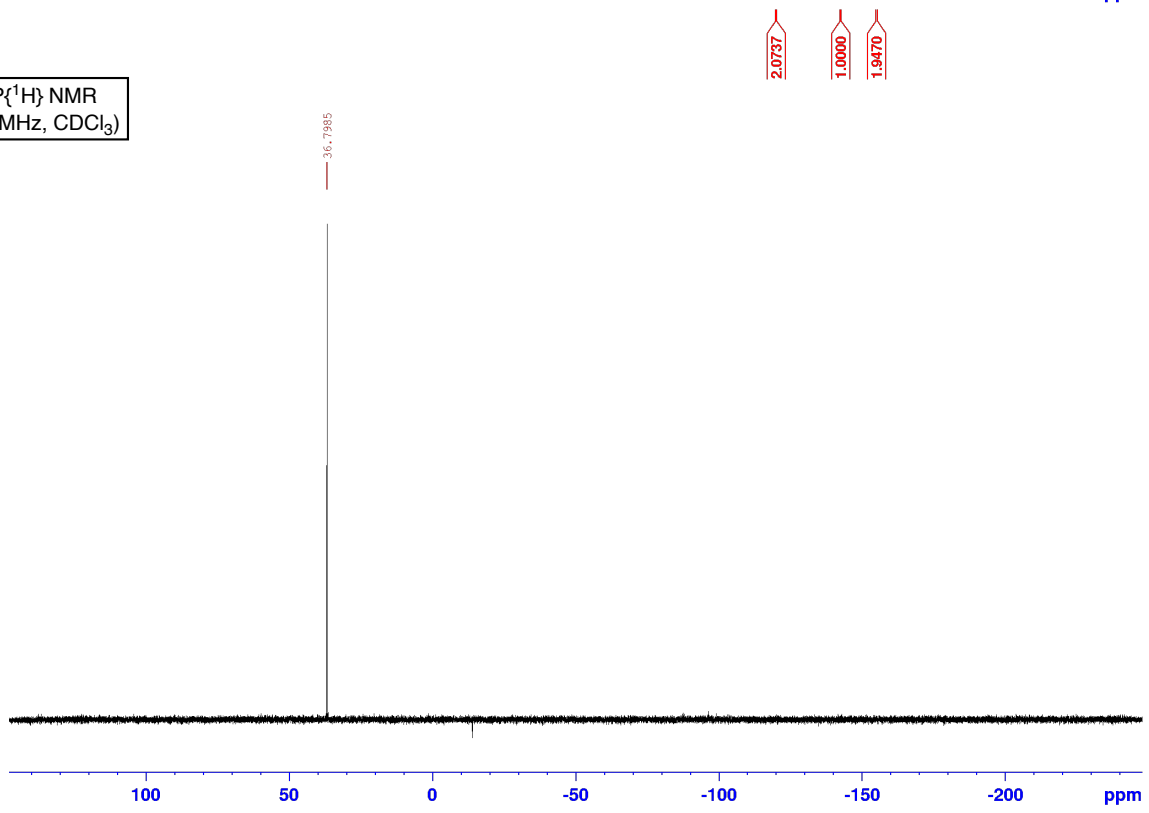

[<sup>1</sup>H, <sup>13</sup>C{<sup>1</sup>H}, and <sup>31</sup>P{<sup>1</sup>H} NMR Spectra of **3ak**]

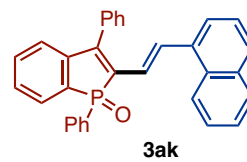

<sup>1</sup>H NMR  
(400 MHz, CDCl<sub>3</sub>)

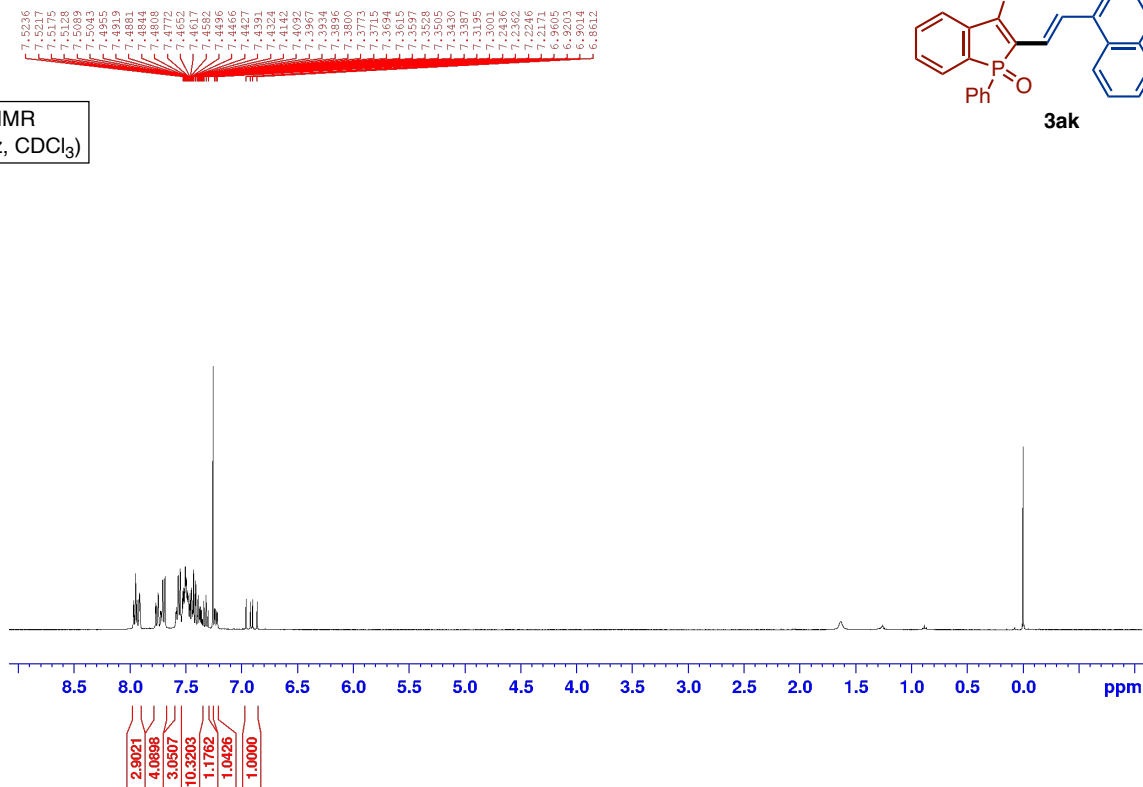

<sup>13</sup>C{<sup>1</sup>H} NMR  
(100 MHz, CDCl<sub>3</sub>)

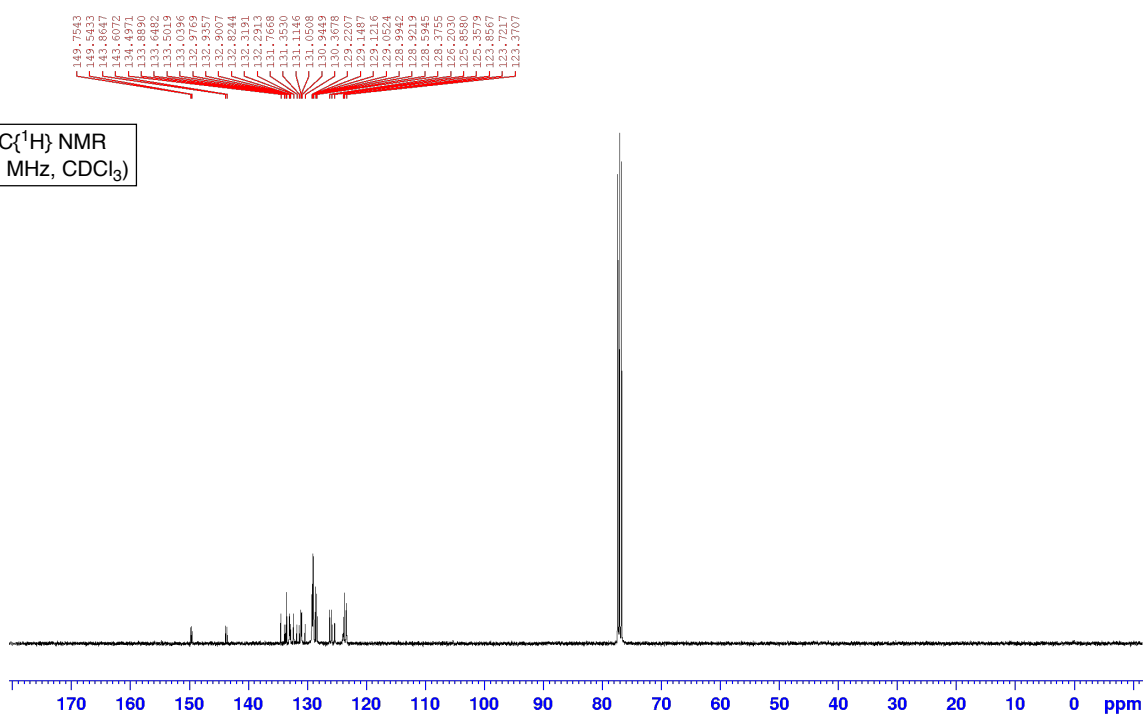

$^{31}\text{P}\{^1\text{H}\}$  NMR  
(162 MHz,  $\text{CDCl}_3$ )

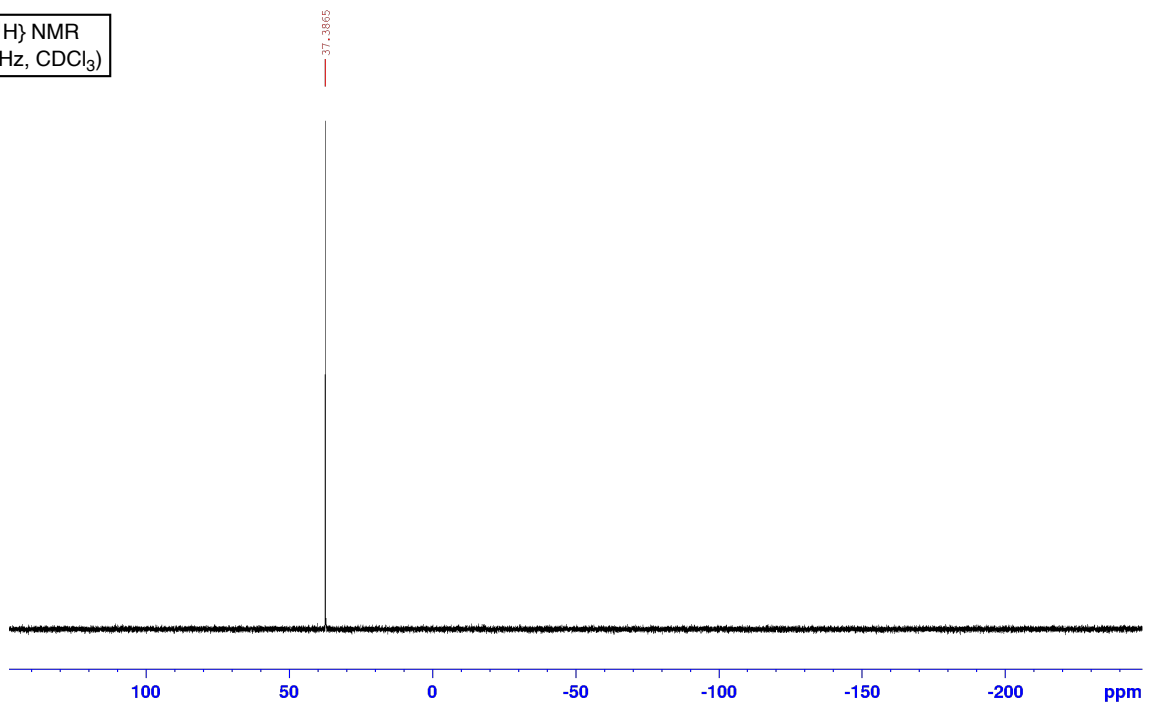

[<sup>1</sup>H, <sup>13</sup>C{<sup>1</sup>H}, and <sup>31</sup>P{<sup>1</sup>H} NMR Spectra of **3al**]

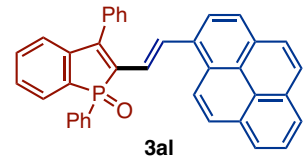

<sup>1</sup>H NMR  
(400 MHz, CDCl<sub>3</sub>)

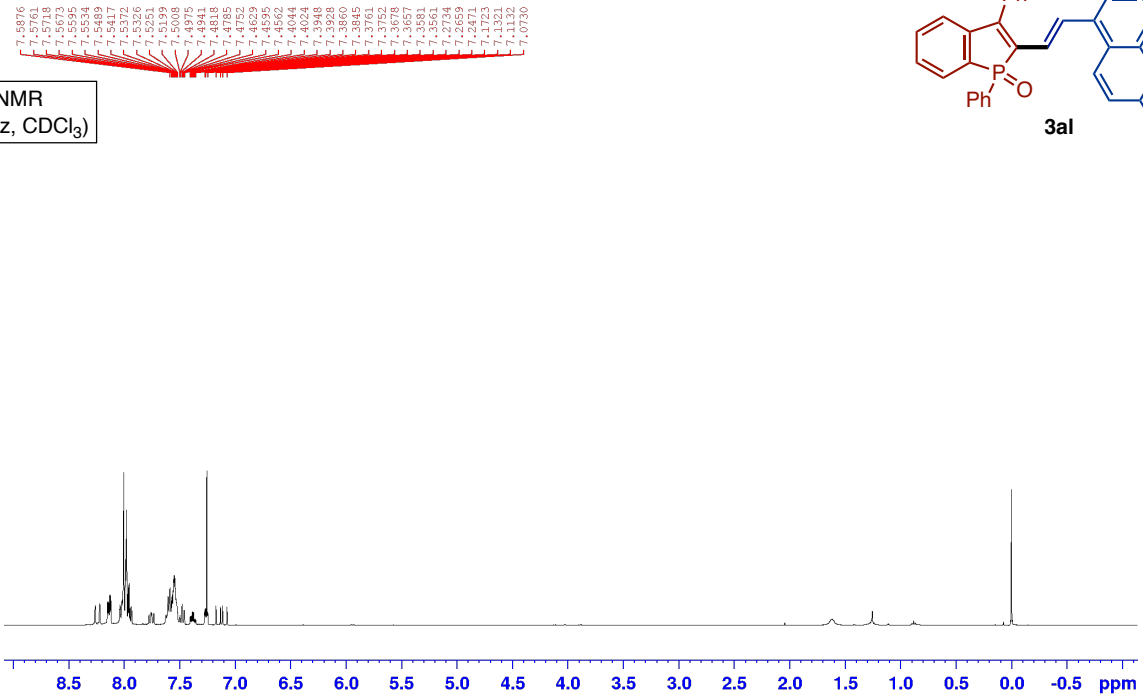

<sup>13</sup>C{<sup>1</sup>H} NMR  
(100 MHz, CDCl<sub>3</sub>)

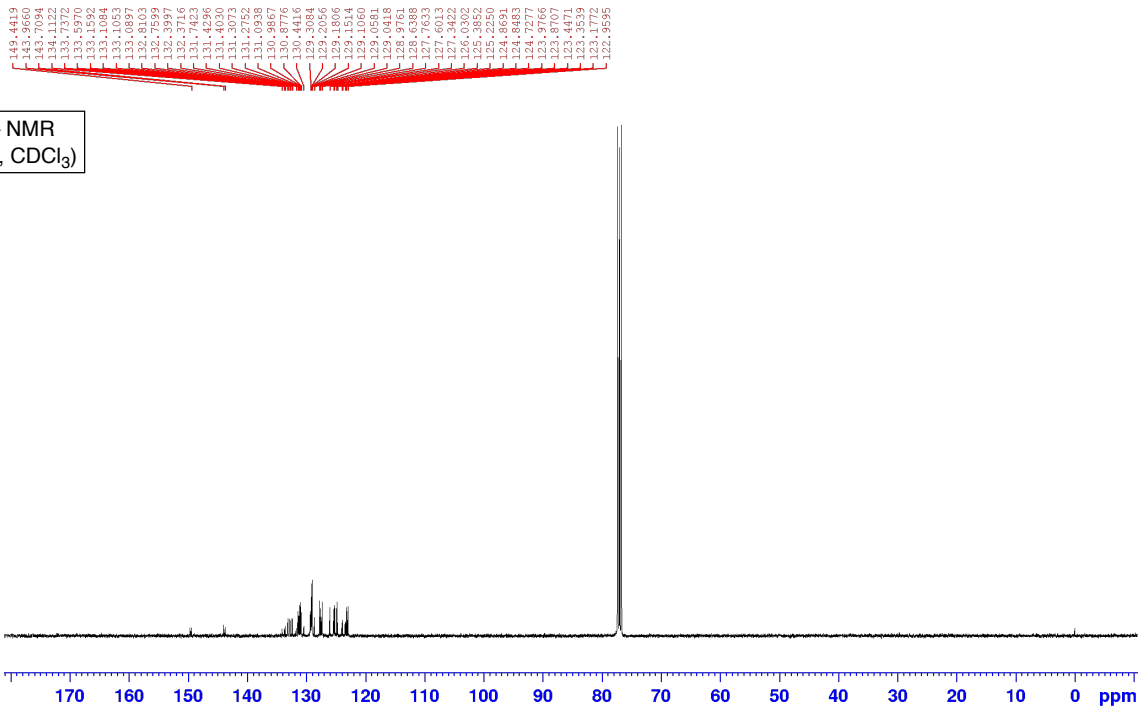

$^{31}\text{P}\{^1\text{H}\}$  NMR  
(162 MHz,  $\text{CDCl}_3$ )

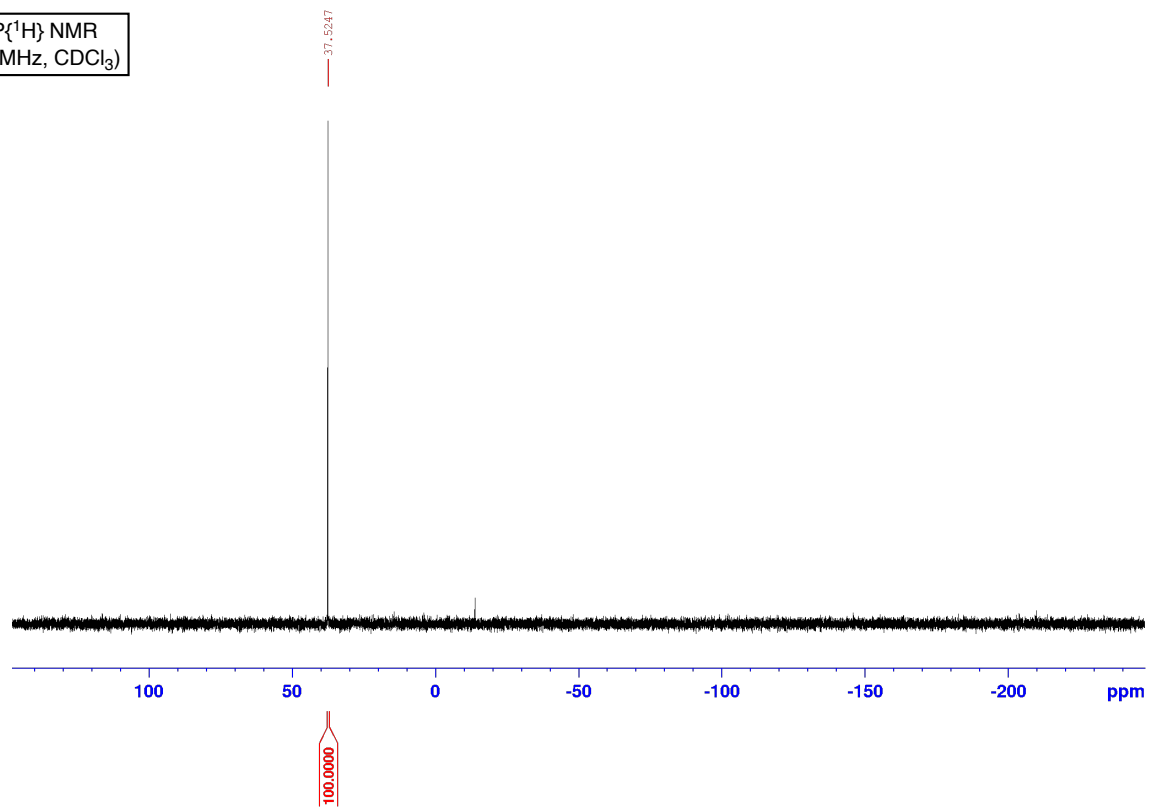



$[^1\text{H}, ^{13}\text{C}\{^1\text{H}\}, \text{ and } ^{31}\text{P}\{^1\text{H}\}] \text{ NMR Spectra of } \mathbf{3am}$

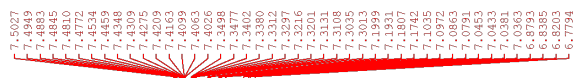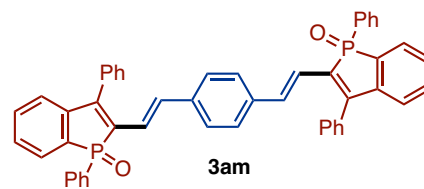

$^1\text{H NMR}$   
(400 MHz,  $\text{CDCl}_3$ )

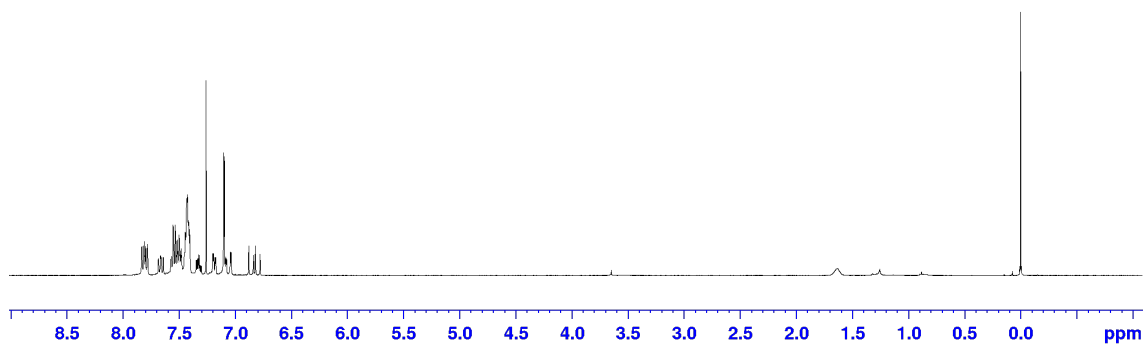

4.0000  
2.1216  
8.2457  
9.8276  
2.1584  
2.0438  
3.7915  
2.0706  
1.9688

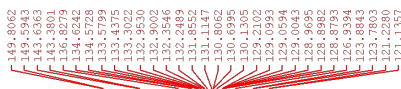

$^{13}\text{C}\{^1\text{H}\} \text{ NMR}$   
(100 MHz,  $\text{CDCl}_3$ )

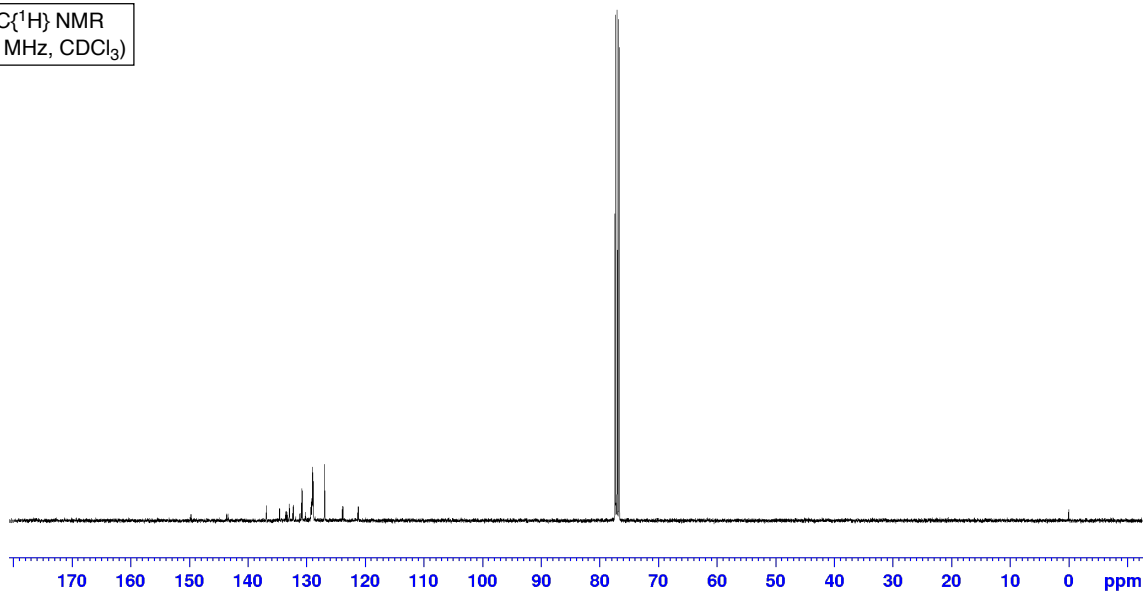

$^{31}\text{P}\{^1\text{H}\}$  NMR  
(162 MHz,  $\text{CDCl}_3$ )

37.4669  
37.4339

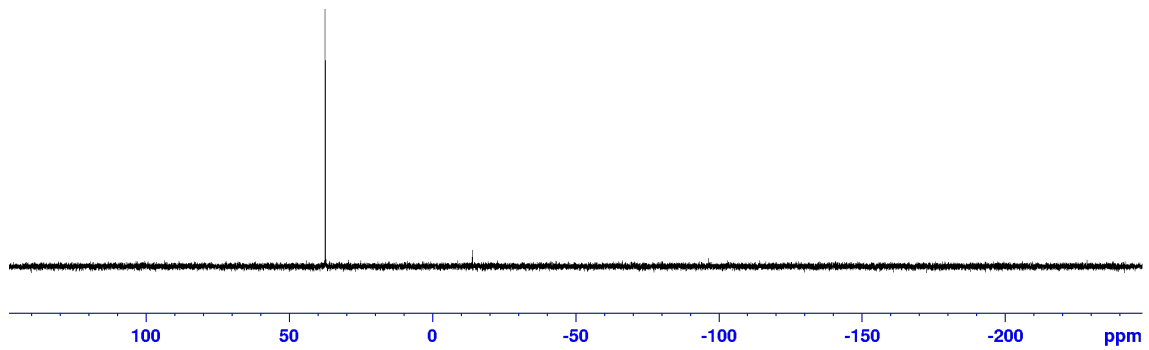

[<sup>1</sup>H, <sup>13</sup>C{<sup>1</sup>H}, and <sup>31</sup>P{<sup>1</sup>H} NMR Spectra of **3an**]

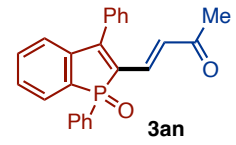

<sup>1</sup>H NMR  
(400 MHz, CDCl<sub>3</sub>)

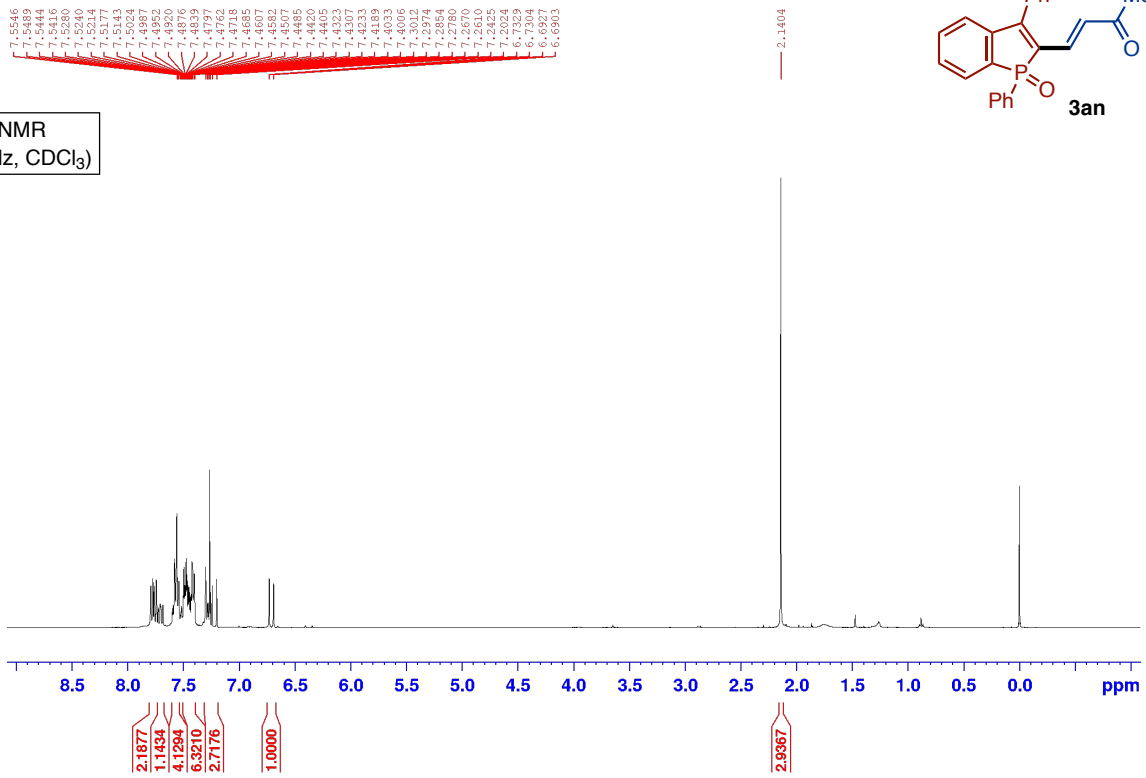

<sup>13</sup>C{<sup>1</sup>H} NMR  
(100 MHz, CDCl<sub>3</sub>)

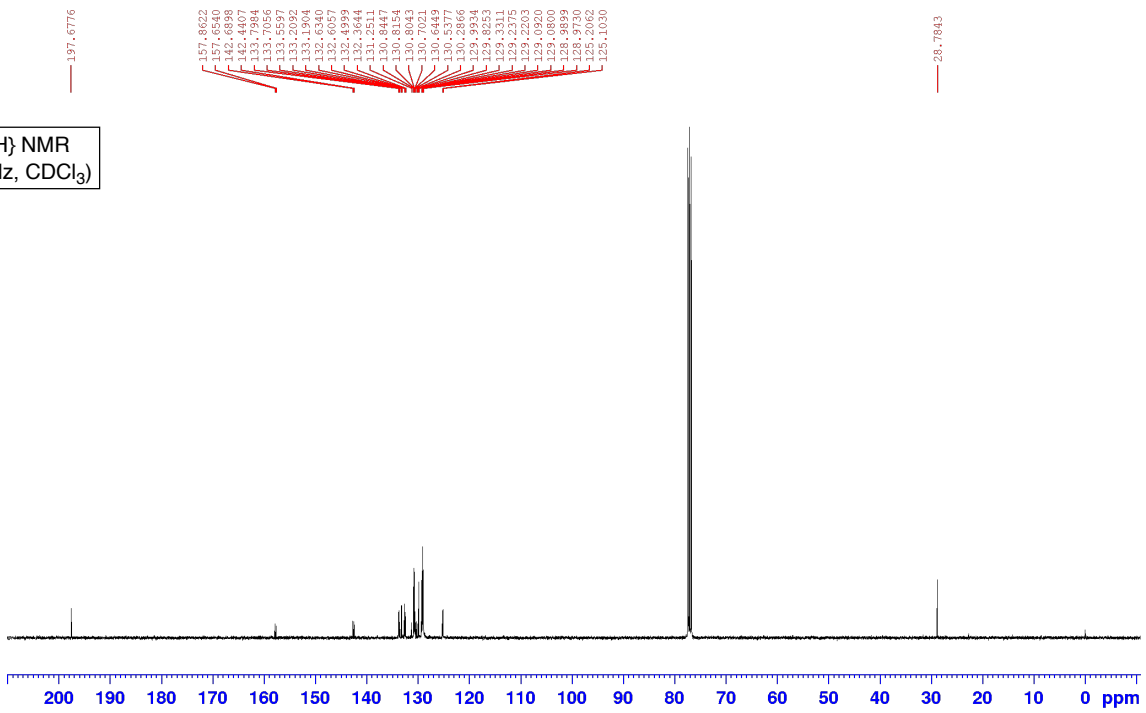

$^{31}\text{P}\{^1\text{H}\}$  NMR  
(162 MHz,  $\text{CDCl}_3$ )

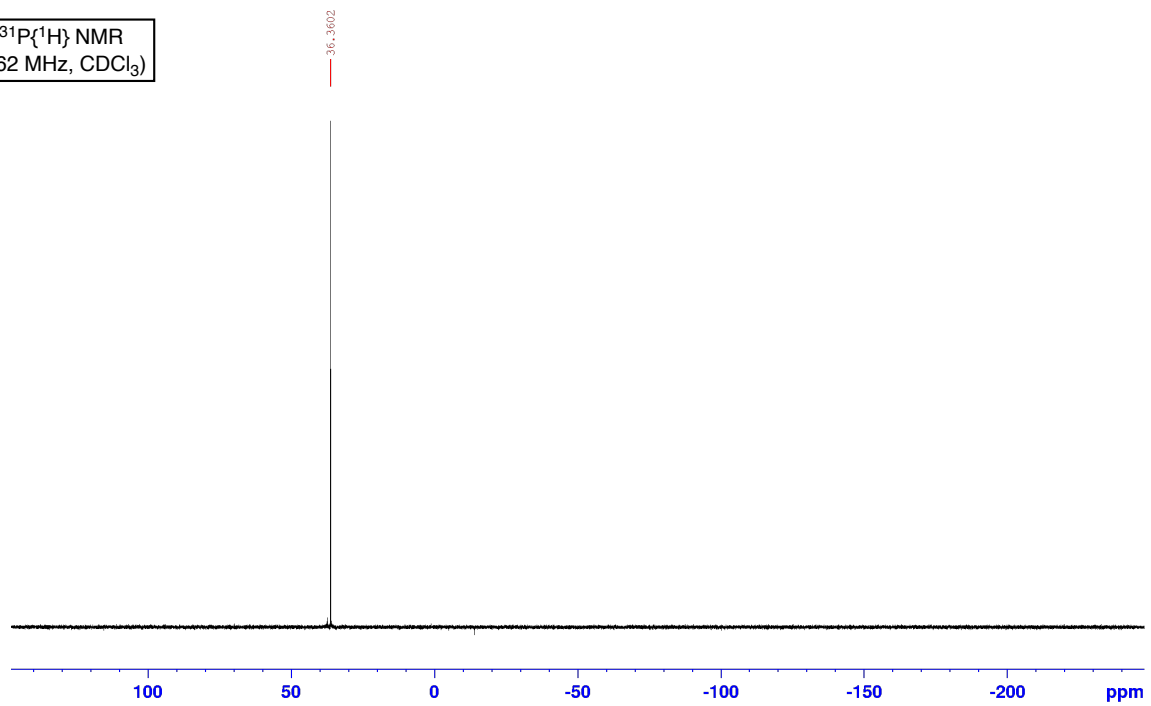

[<sup>1</sup>H, <sup>13</sup>C{<sup>1</sup>H}, and <sup>31</sup>P{<sup>1</sup>H} NMR Spectra of **3ao**]

<sup>1</sup>H NMR  
(400 MHz, CDCl<sub>3</sub>)

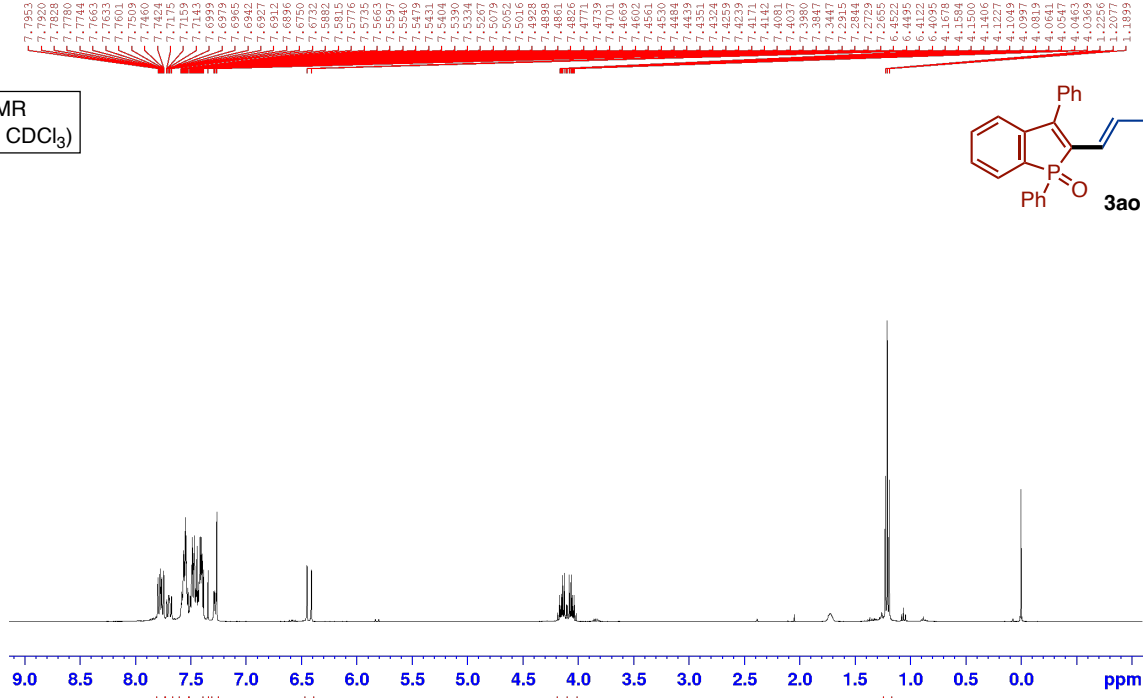

<sup>13</sup>C{<sup>1</sup>H} NMR  
(100 MHz, CDCl<sub>3</sub>)

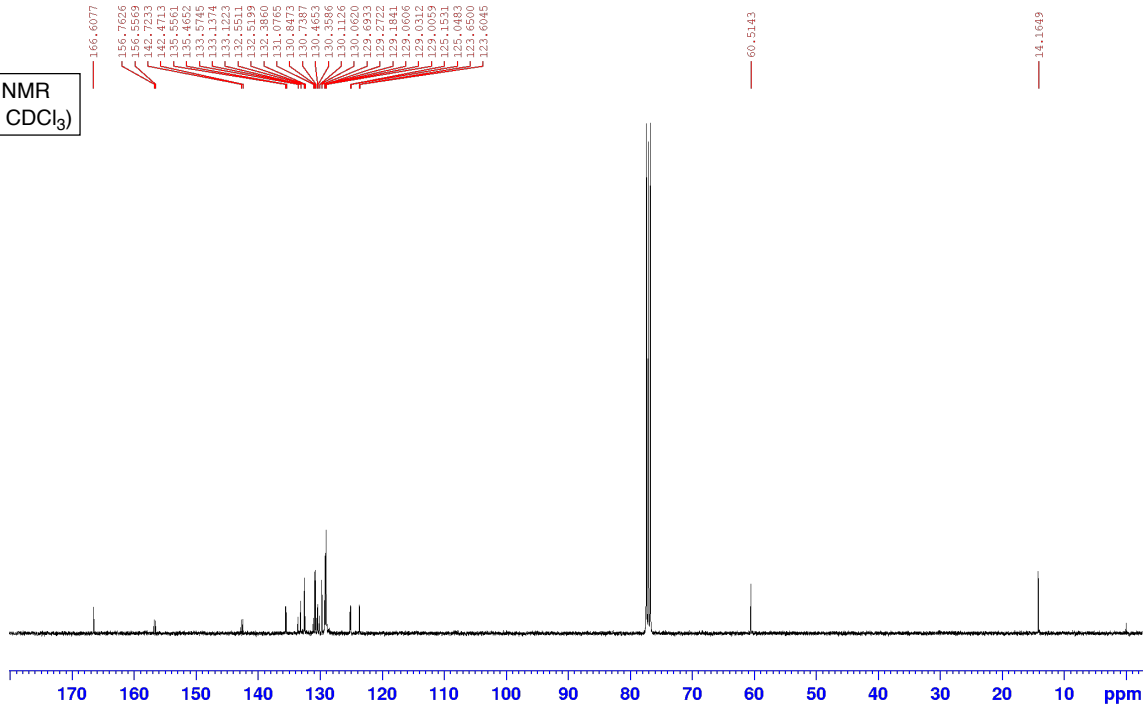

$^{31}\text{P}\{^1\text{H}\}$  NMR  
(162 MHz,  $\text{CDCl}_3$ )

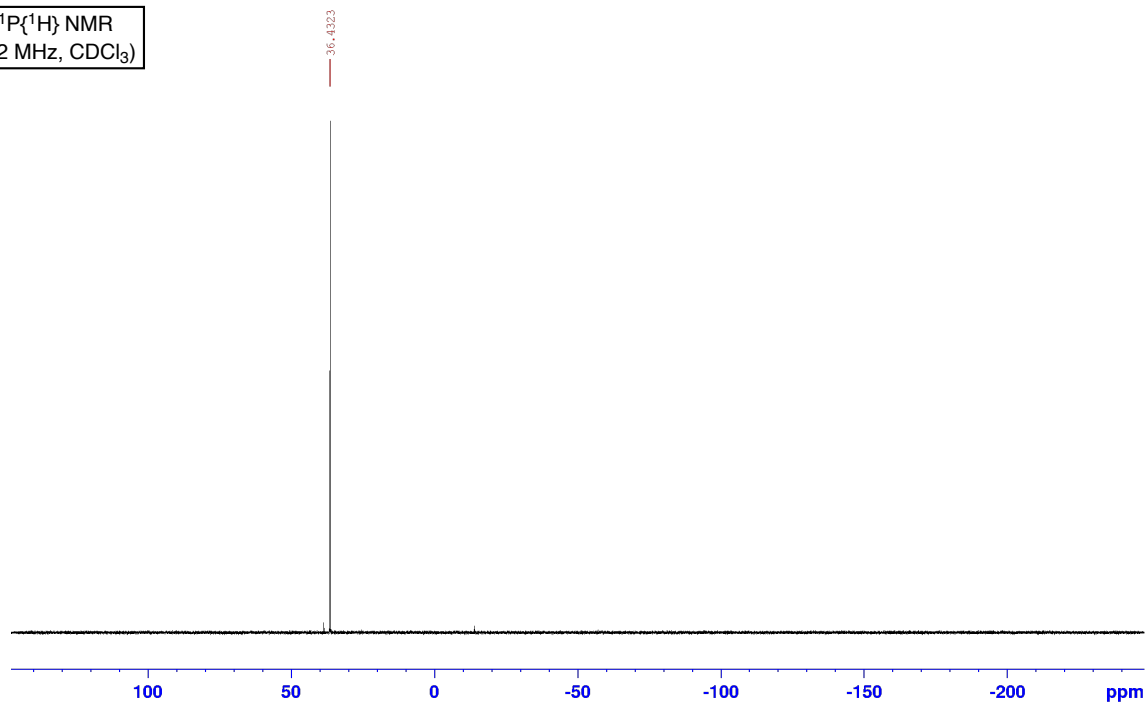

[<sup>1</sup>H, <sup>13</sup>C{<sup>1</sup>H}, and <sup>31</sup>P{<sup>1</sup>H} NMR Spectra of **3ap**]

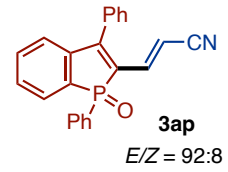

<sup>1</sup>H NMR  
(400 MHz, CDCl<sub>3</sub>)

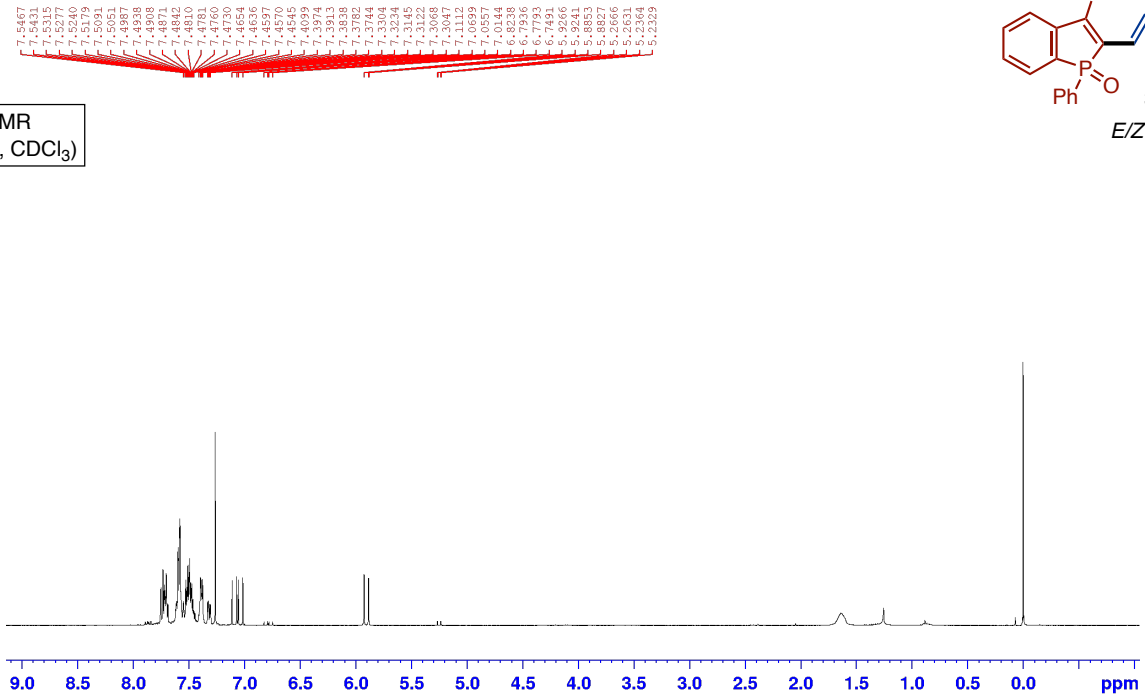

<sup>13</sup>C{<sup>1</sup>H} NMR  
(100 MHz, CDCl<sub>3</sub>)

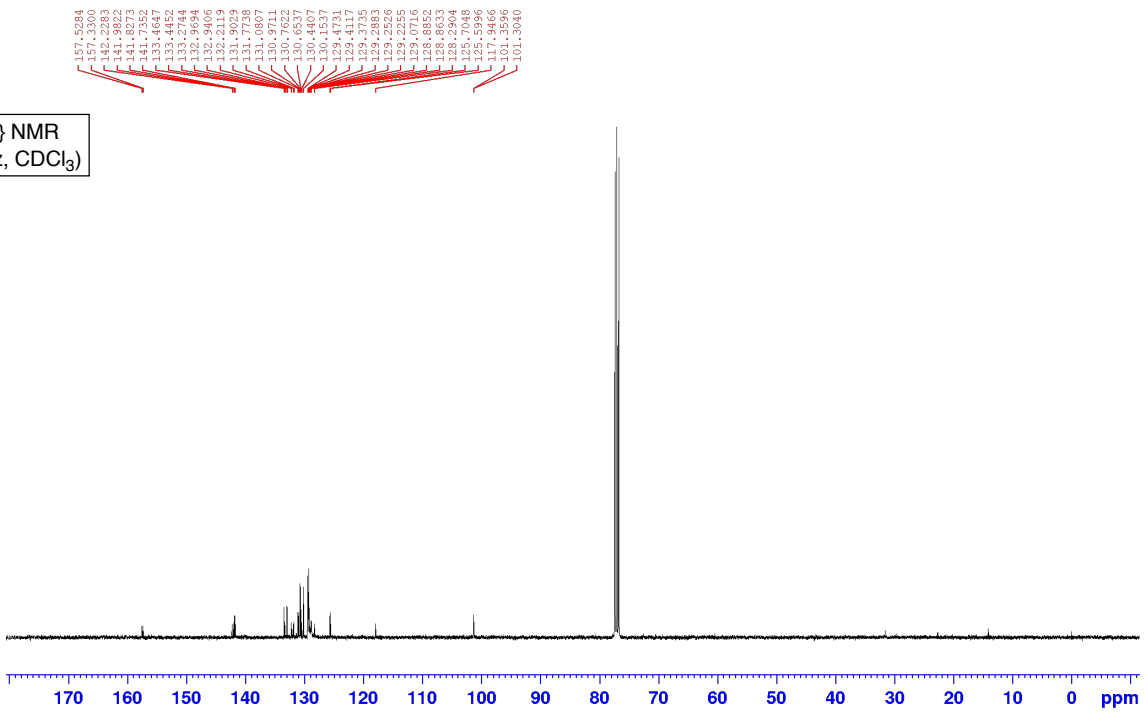

$^{31}\text{P}\{^1\text{H}\}$  NMR  
(162 MHz,  $\text{CDCl}_3$ )

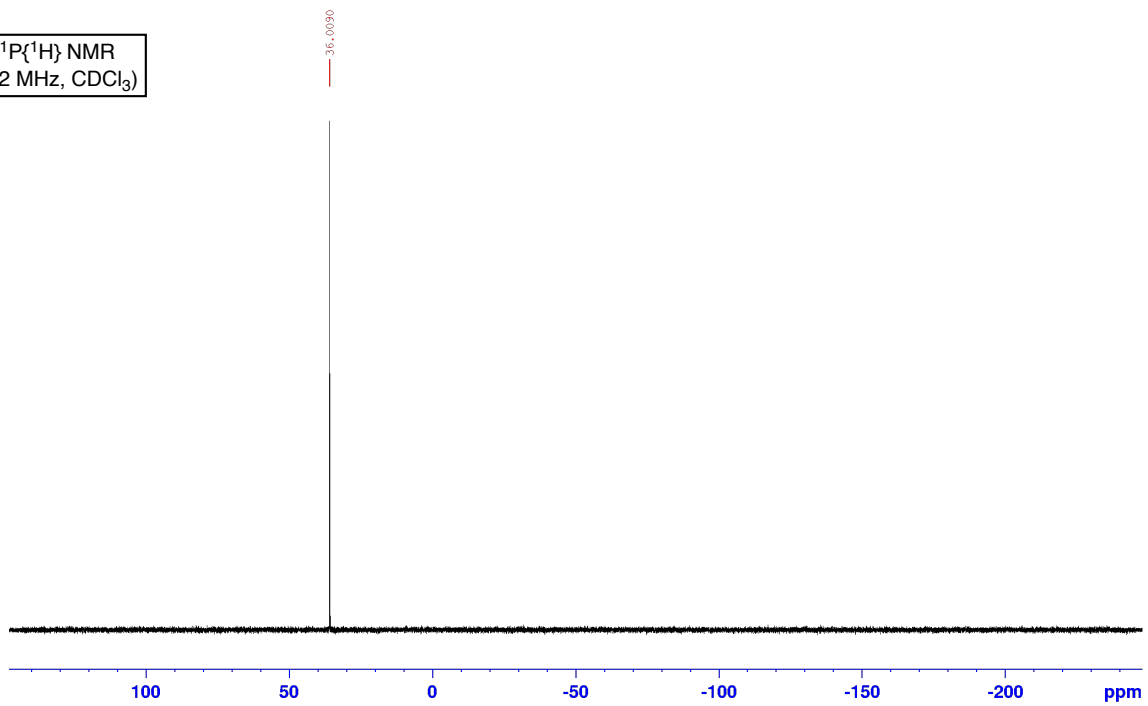



$^1\text{H}$ ,  $^{13}\text{C}\{^1\text{H}\}$ , and  $^{31}\text{P}\{^1\text{H}\}$  NMR Spectra of **3aq**

$^1\text{H}$  NMR  
(400 MHz,  $\text{CDCl}_3$ )

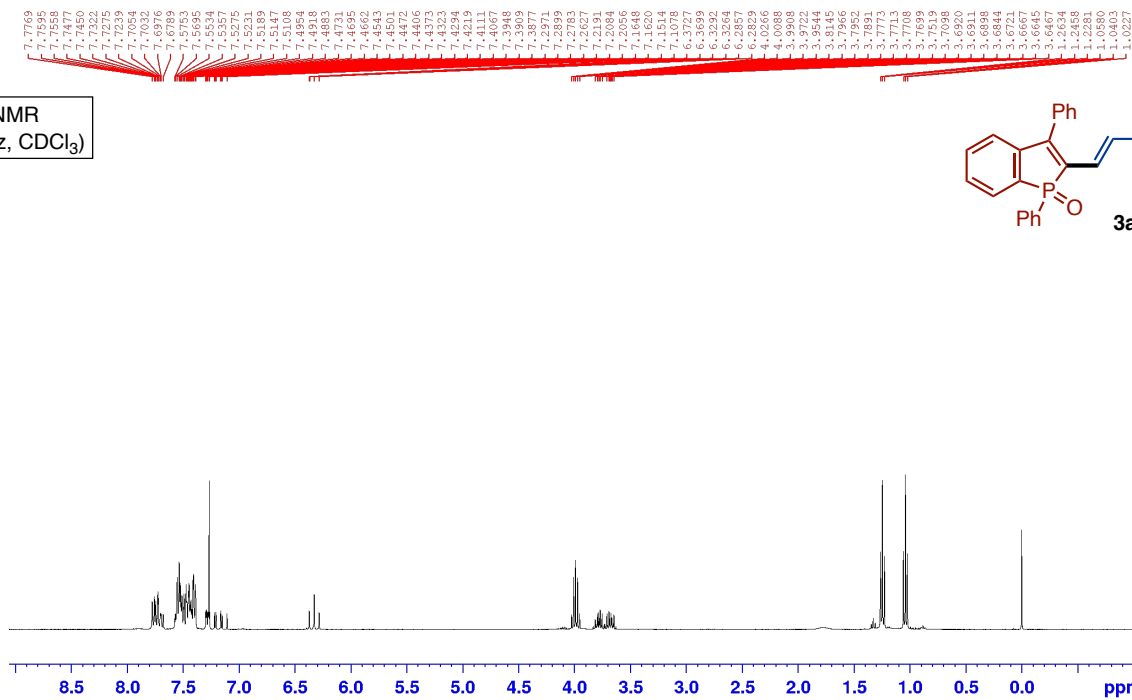

$^{13}\text{C}\{^1\text{H}\}$  NMR  
(100 MHz,  $\text{CDCl}_3$ )

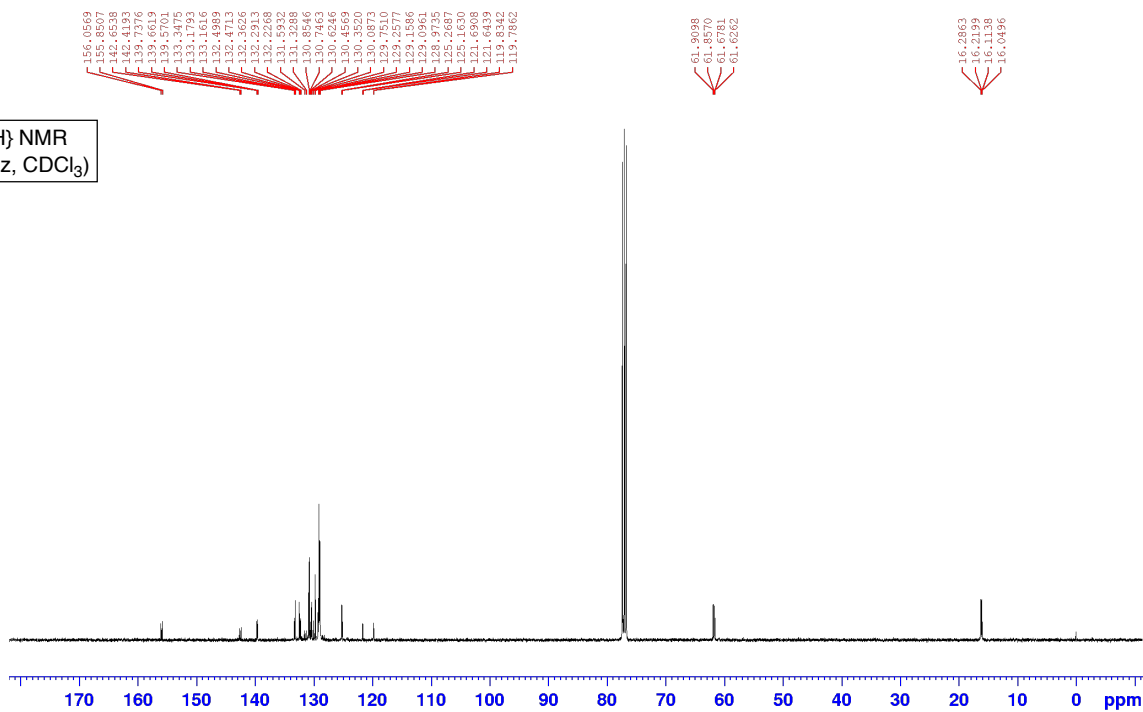

$^{31}\text{P}\{^1\text{H}\}$  NMR  
(162 MHz,  $\text{CDCl}_3$ )

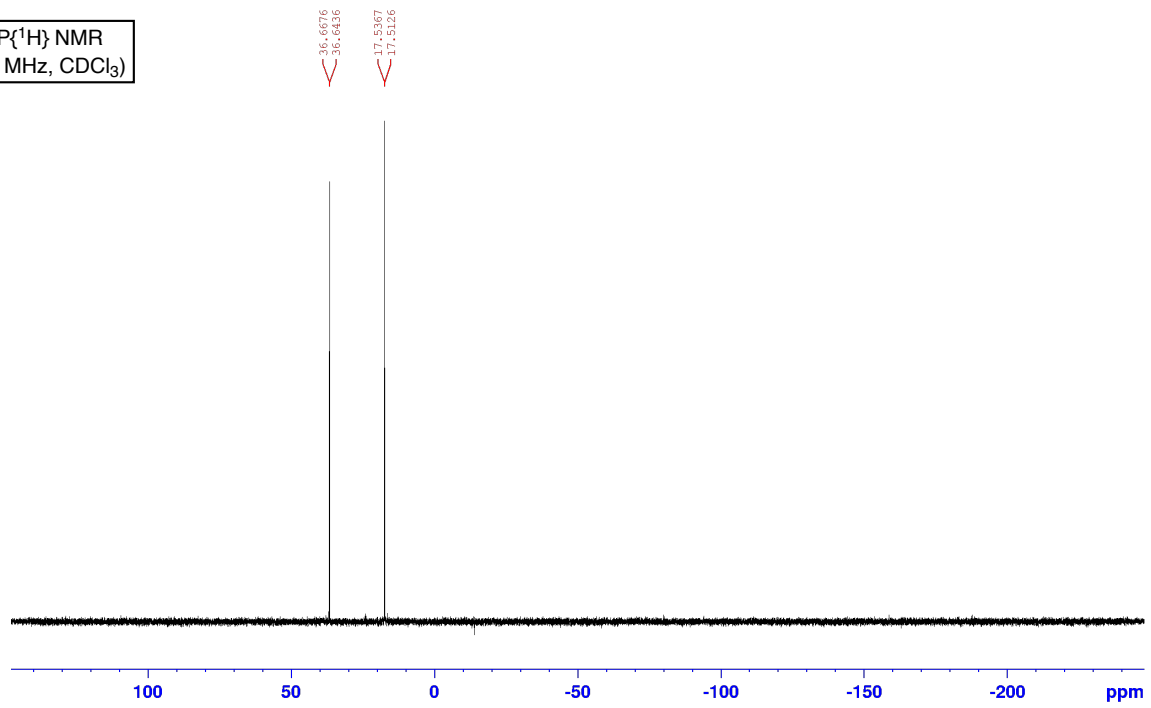

[<sup>1</sup>H, <sup>13</sup>C {<sup>1</sup>H}, and <sup>31</sup>P {<sup>1</sup>H} NMR Spectra of **3ba**]

<sup>1</sup>H NMR  
(400 MHz, CDCl<sub>3</sub>)

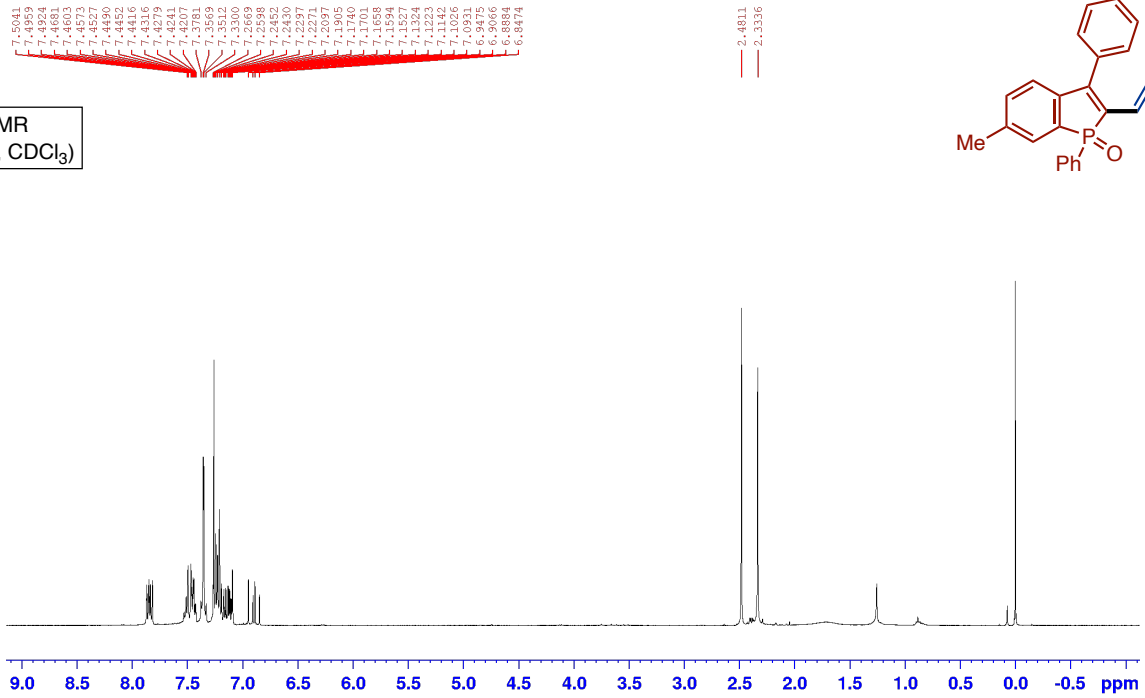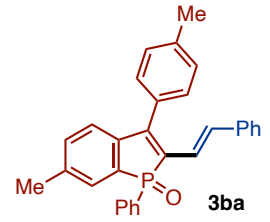

<sup>13</sup>C {<sup>1</sup>H} NMR  
(100 MHz, CDCl<sub>3</sub>)

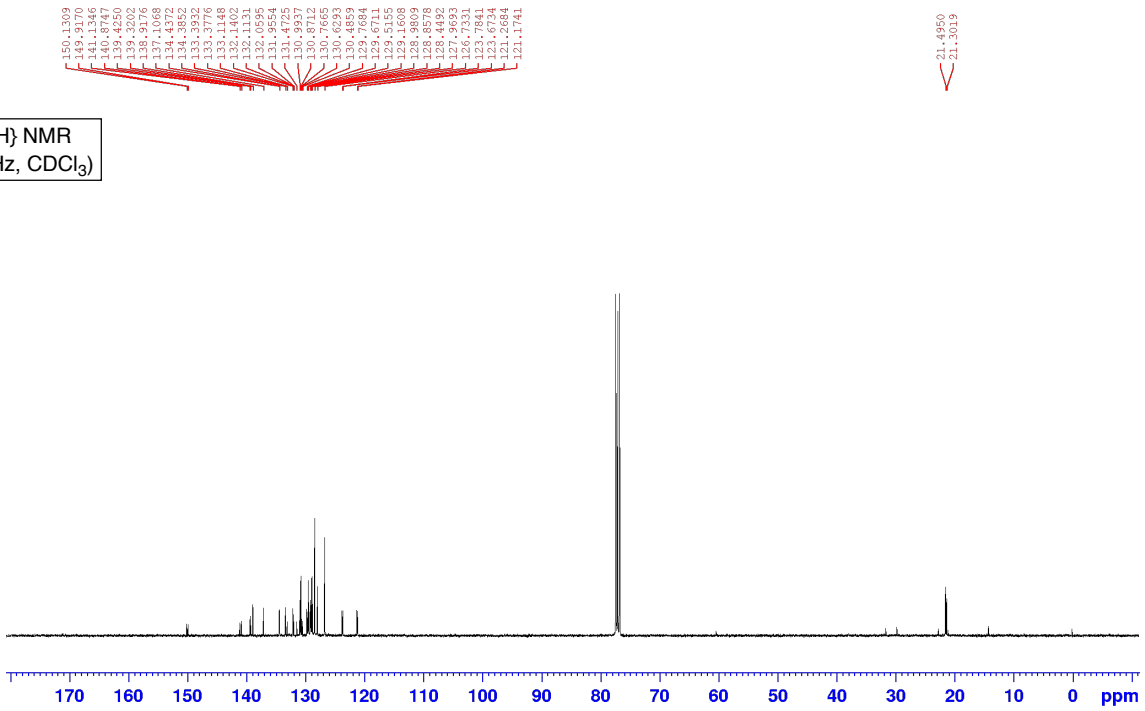

$^{31}\text{P}\{^1\text{H}\}$  NMR  
(162 MHz,  $\text{CDCl}_3$ )

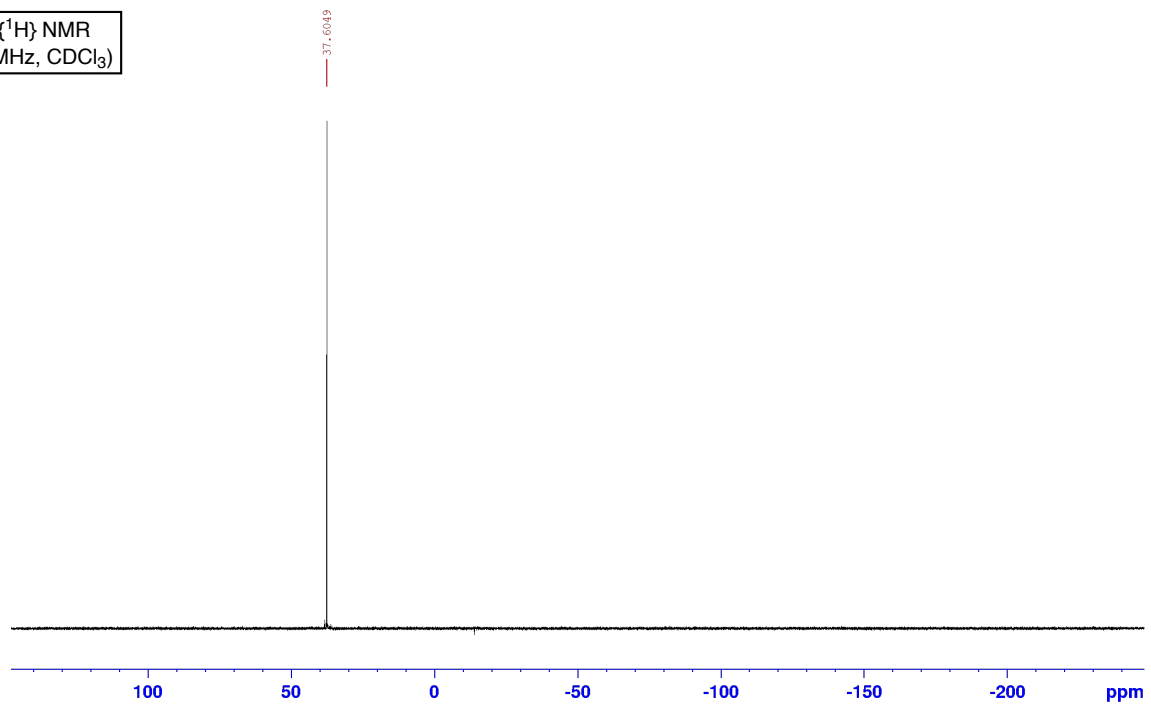

$^1\text{H}$ ,  $^{13}\text{C}\{^1\text{H}\}$ , and  $^{31}\text{P}\{^1\text{H}\}$  NMR Spectra of **3ca**

$^1\text{H}$  NMR  
(400 MHz,  $\text{CDCl}_3$ )

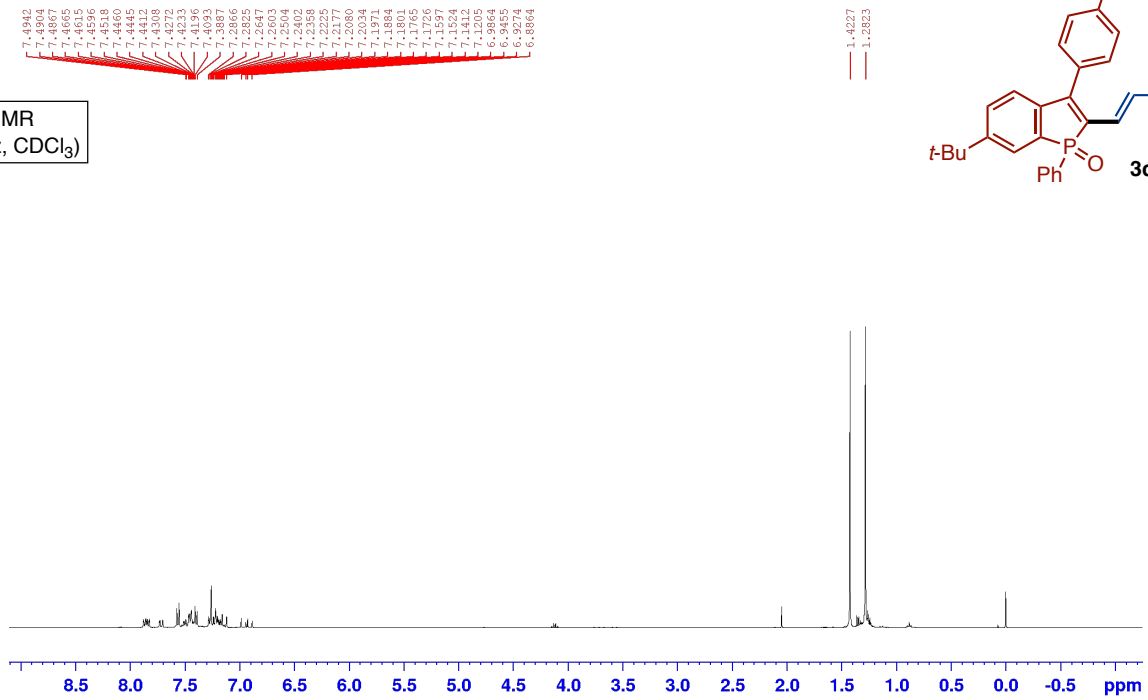

$^{13}\text{C}\{^1\text{H}\}$  NMR  
(100 MHz,  $\text{CDCl}_3$ )

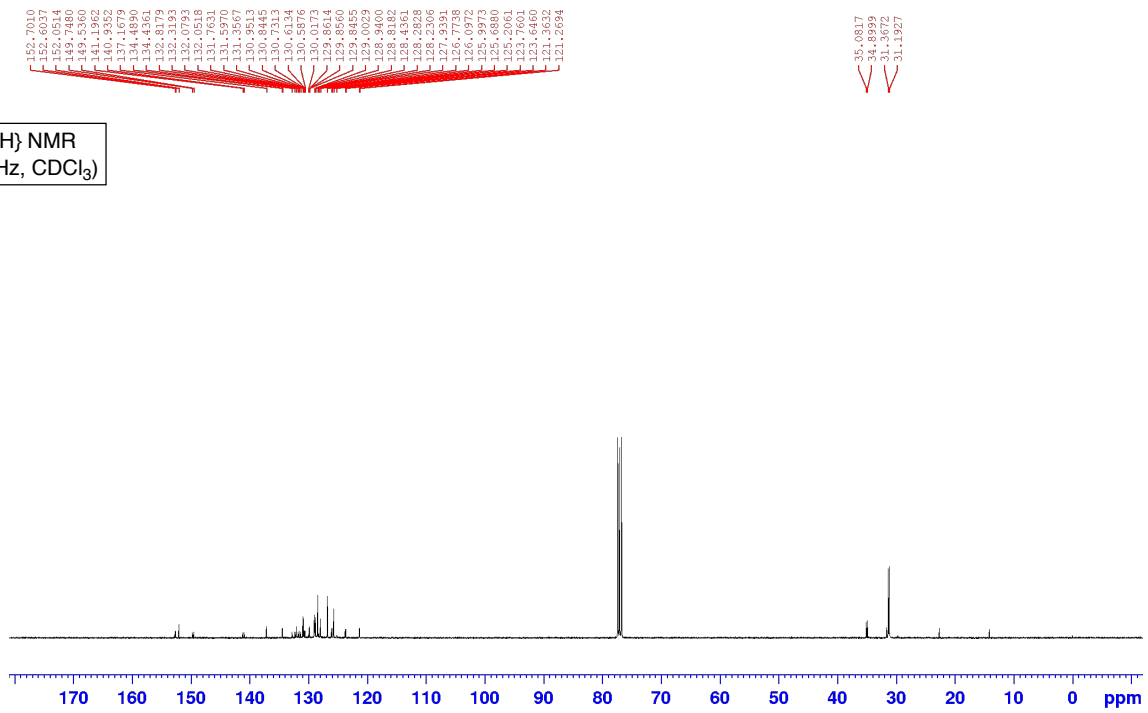

$^{31}\text{P}\{^1\text{H}\}$  NMR  
(162 MHz,  $\text{CDCl}_3$ )

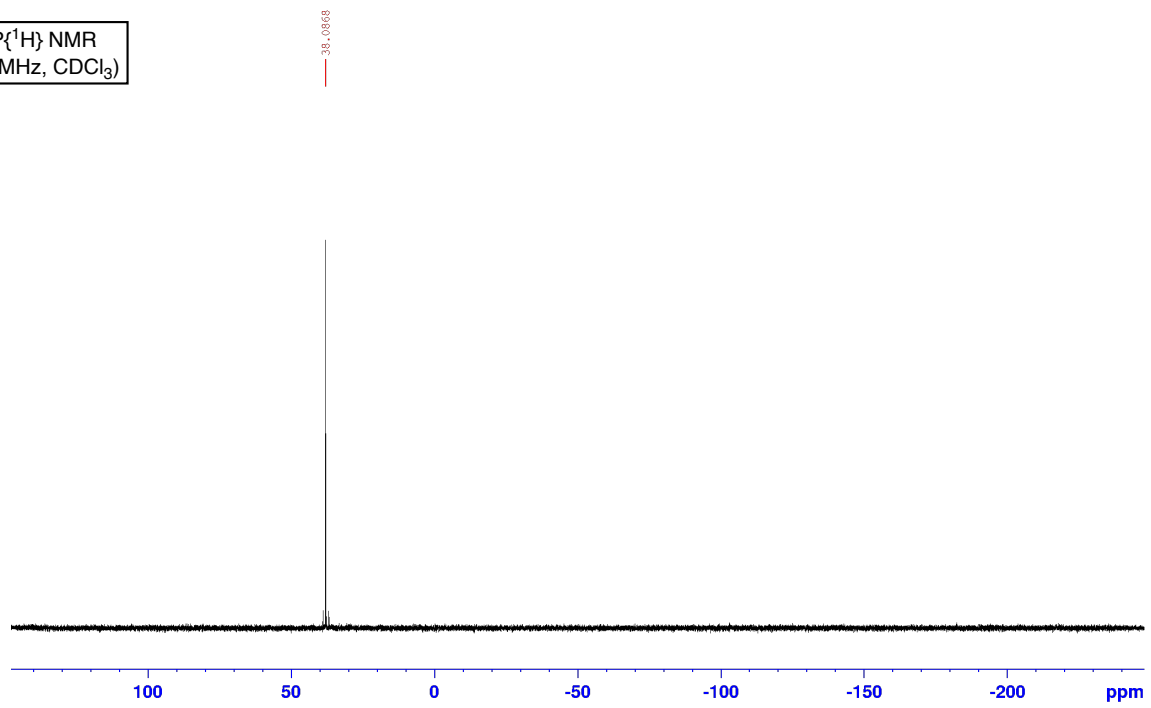

$^1\text{H}$ ,  $^{13}\text{C}\{^1\text{H}\}$ , and  $^{31}\text{P}\{^1\text{H}\}$  NMR Spectra of **3da**

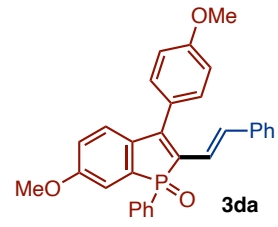

$^1\text{H}$  NMR  
(400 MHz,  $\text{CDCl}_3$ )

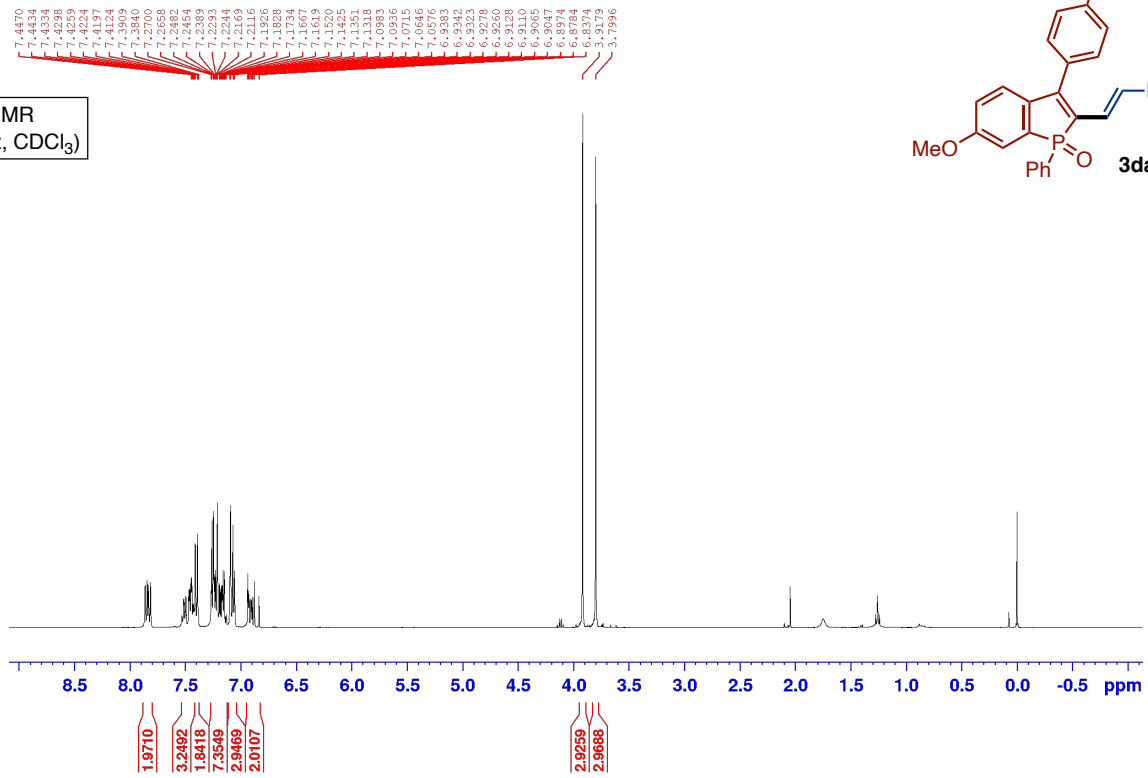

$^{13}\text{C}\{^1\text{H}\}$  NMR  
(100 MHz,  $\text{CDCl}_3$ )

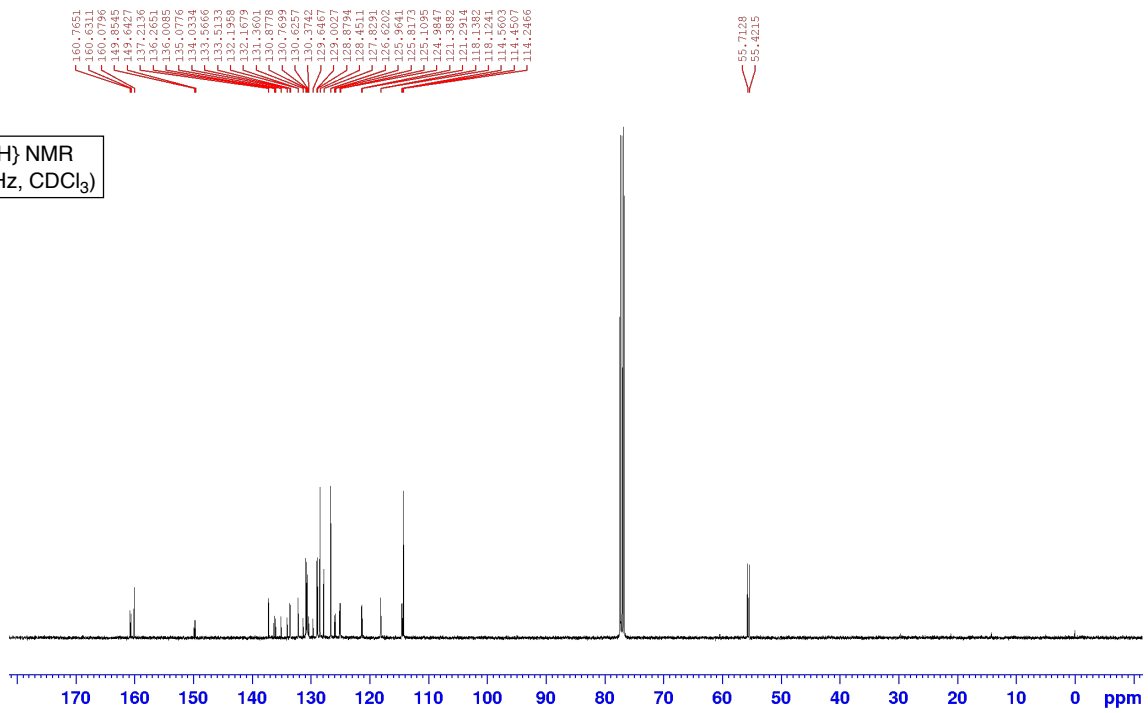

$^{31}\text{P}\{^1\text{H}\}$  NMR  
(162 MHz,  $\text{CDCl}_3$ )

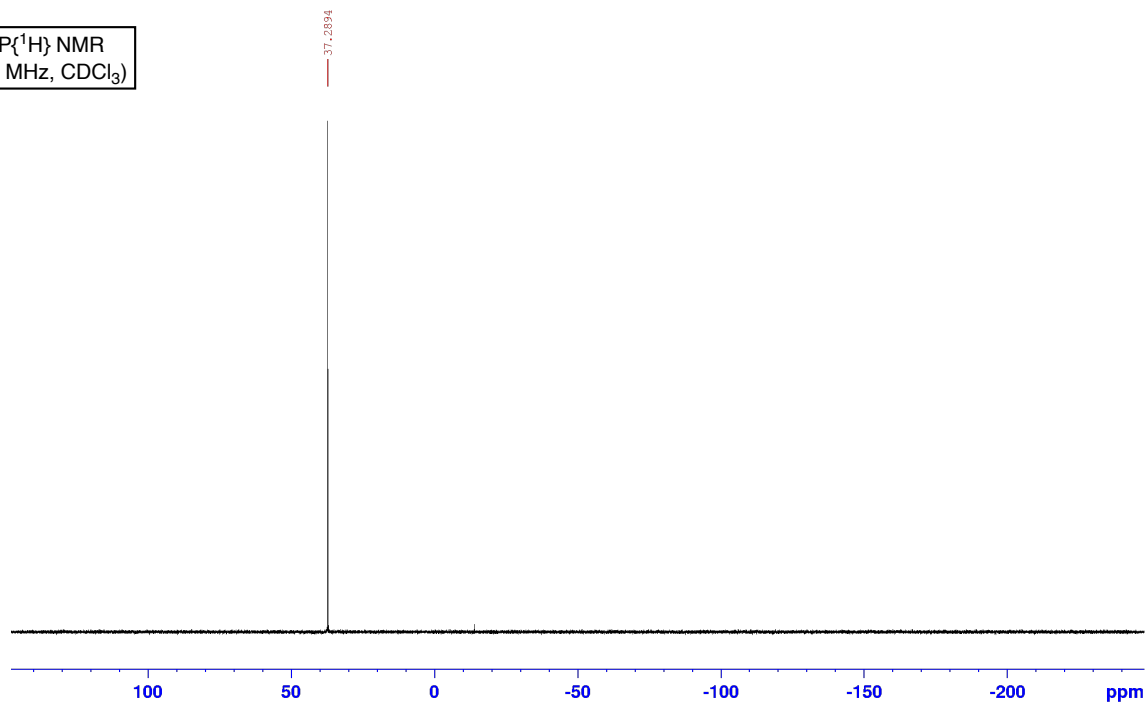



$^1\text{H}$ ,  $^{13}\text{C}\{^1\text{H}\}$ , and  $^{31}\text{P}\{^1\text{H}\}$  NMR Spectra of **3ea**

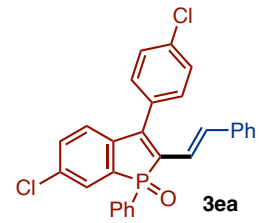

$^1\text{H}$  NMR  
(400 MHz,  $\text{CDCl}_3$ )

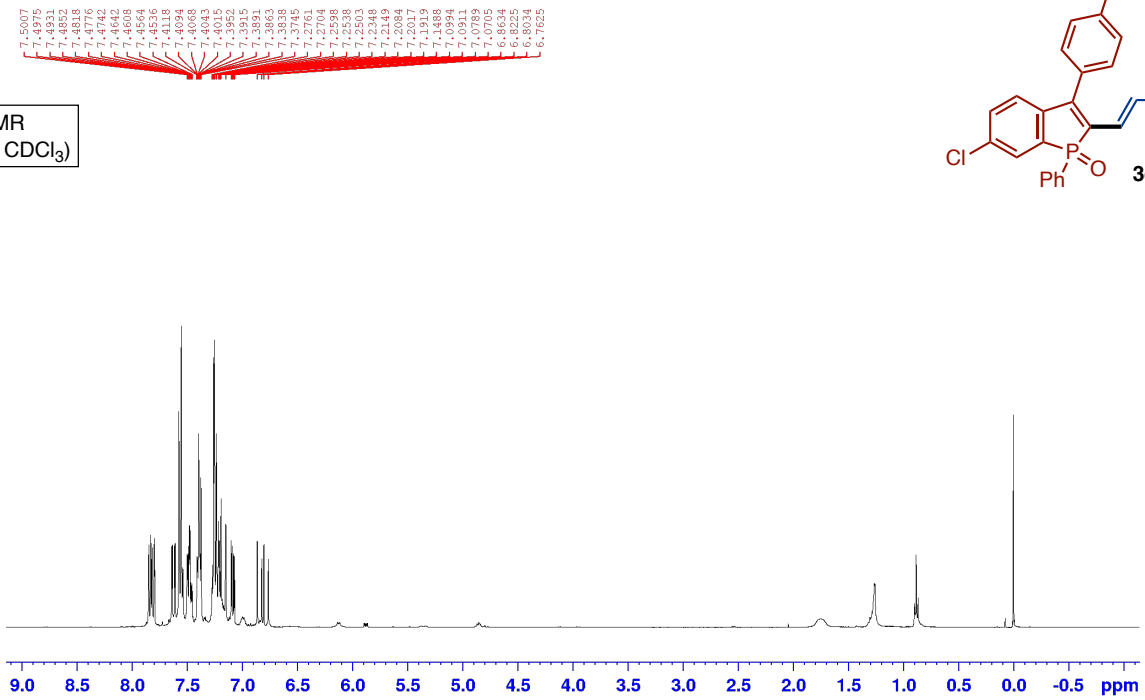

$^{13}\text{C}\{^1\text{H}\}$  NMR  
(100 MHz,  $\text{CDCl}_3$ )

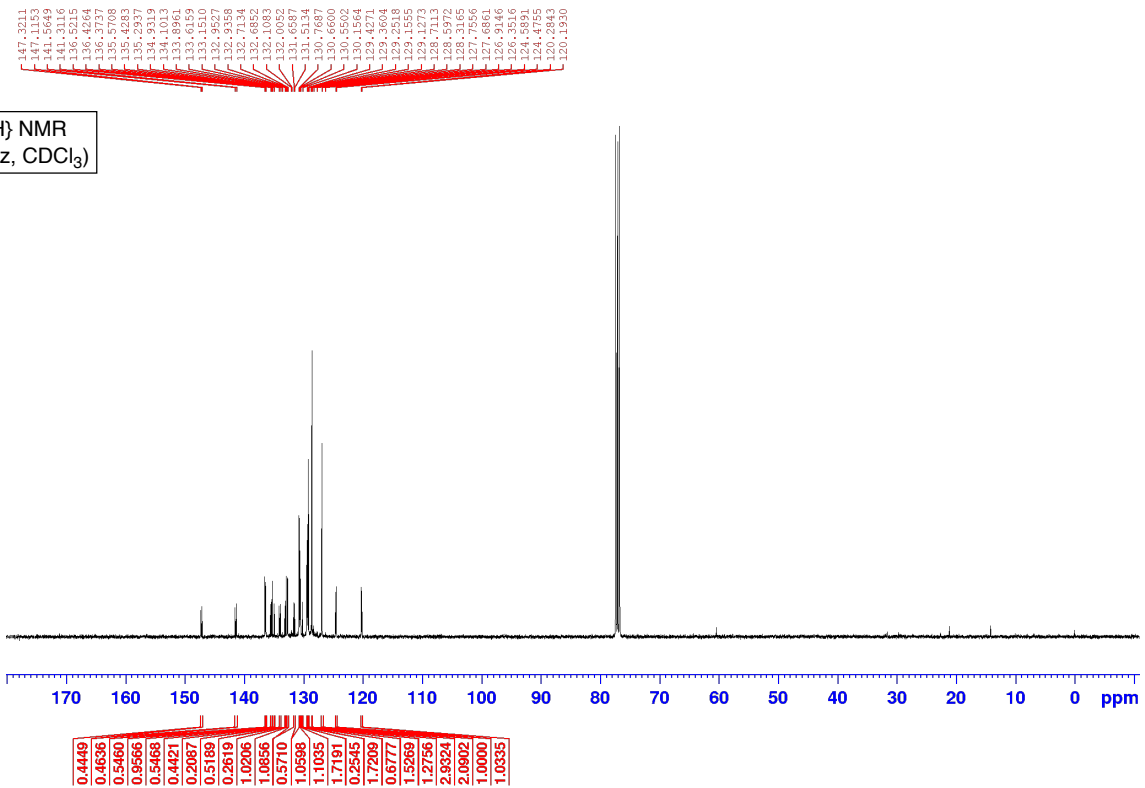

$^{31}\text{P}\{^1\text{H}\}$  NMR  
(162 MHz,  $\text{CDCl}_3$ )

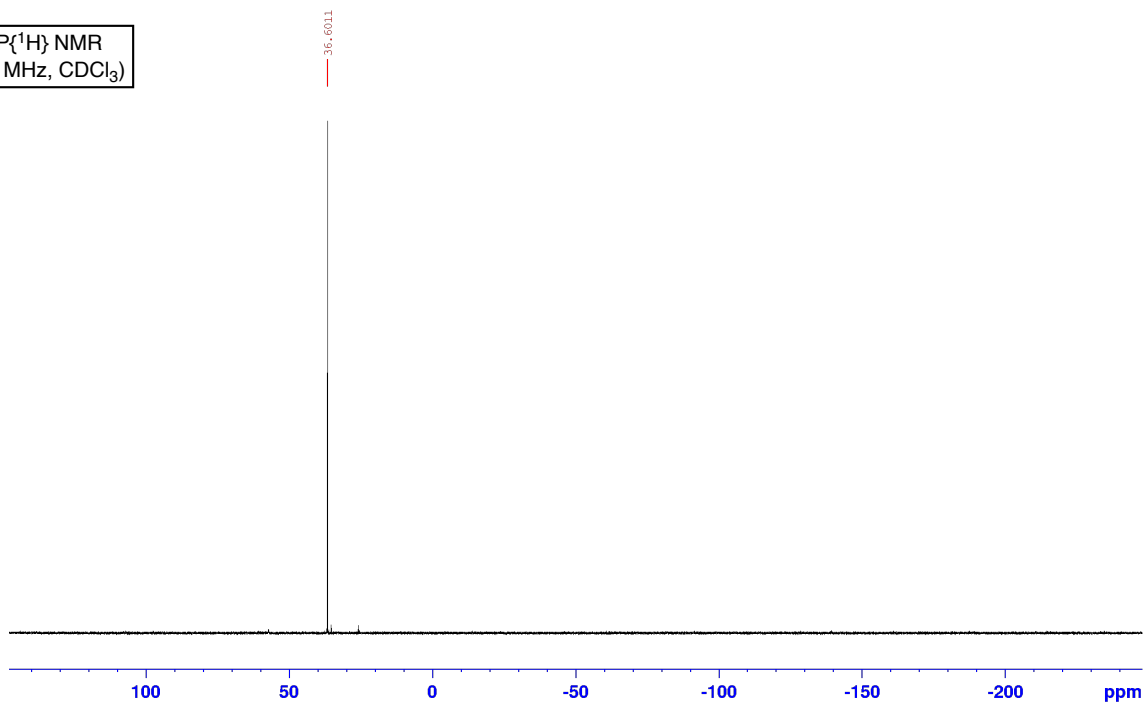

[<sup>1</sup>H, <sup>13</sup>C{<sup>1</sup>H}, <sup>19</sup>F{<sup>1</sup>H}, and <sup>31</sup>P{<sup>1</sup>H} NMR Spectra of **3fa**]

<sup>1</sup>H NMR  
(400 MHz, CDCl<sub>3</sub>)

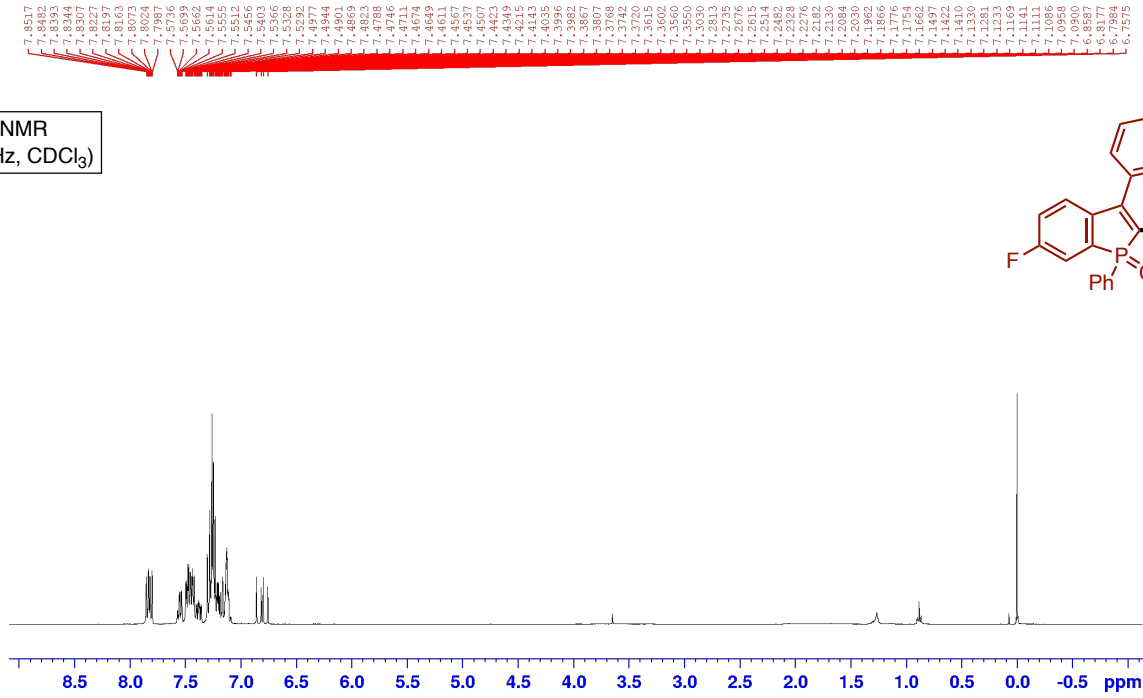

<sup>13</sup>C{<sup>1</sup>H} NMR  
(100 MHz, CDCl<sub>3</sub>)

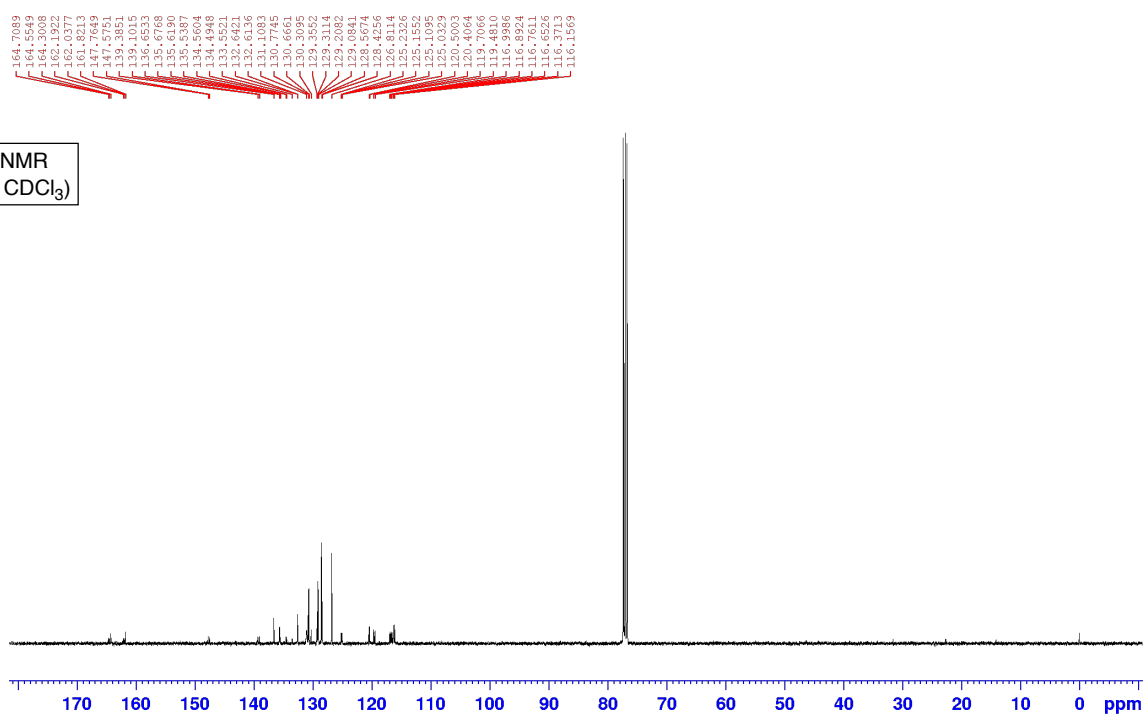

$^{19}\text{F}\{^1\text{H}\}$  NMR  
(376 MHz,  $\text{CDCl}_3$ )

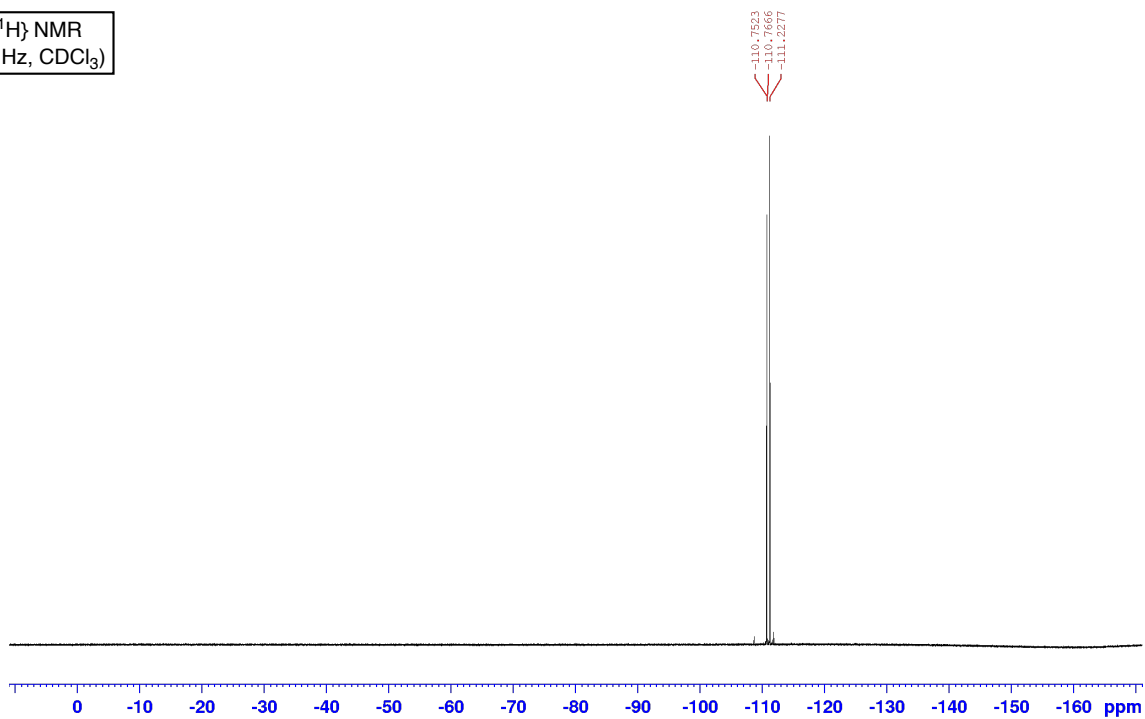

$^{31}\text{P}\{^1\text{H}\}$  NMR  
(162 MHz,  $\text{CDCl}_3$ )

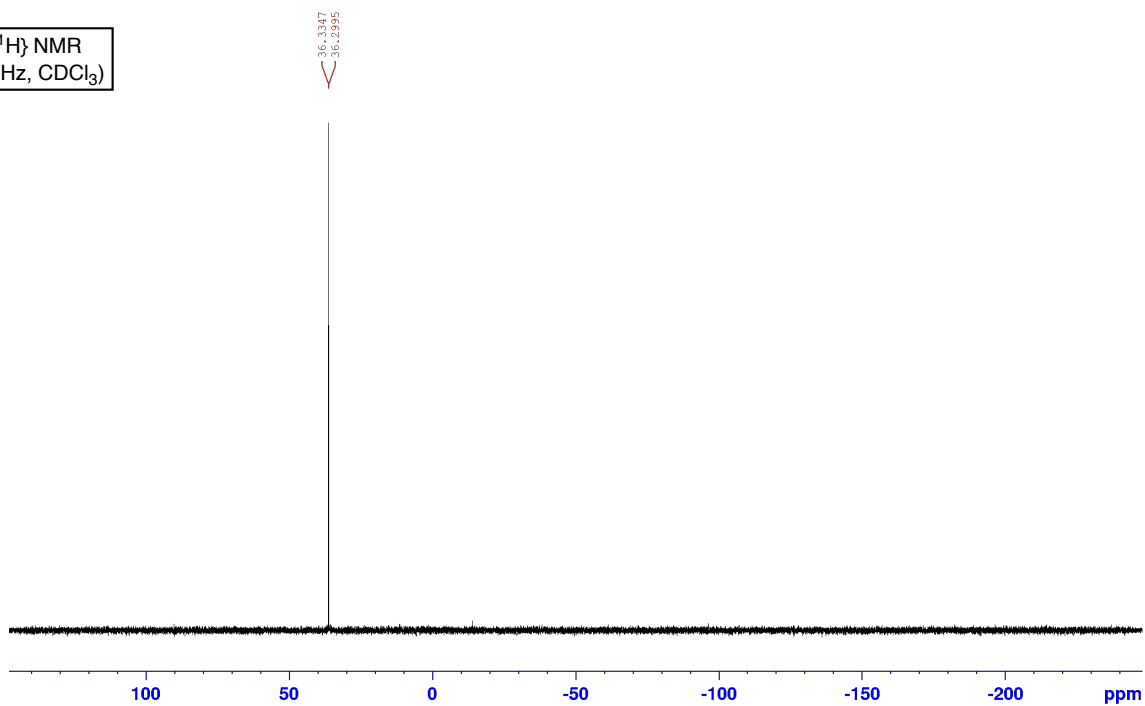

$^1\text{H}$ ,  $^{13}\text{C}\{^1\text{H}\}$ , and  $^{31}\text{P}\{^1\text{H}\}$  NMR Spectra of **3ga**

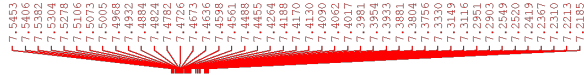

$^1\text{H}$  NMR  
(400 MHz,  $\text{CDCl}_3$ )

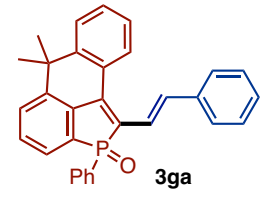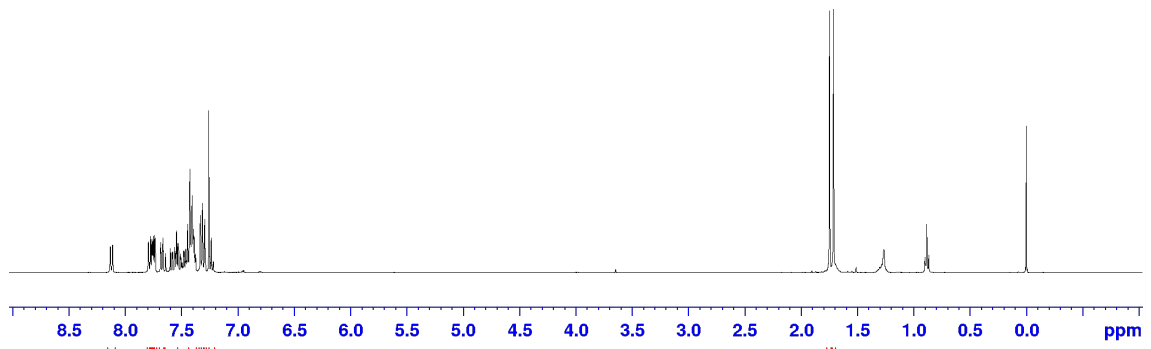

$^{13}\text{C}\{^1\text{H}\}$  NMR  
(100 MHz,  $\text{CDCl}_3$ )

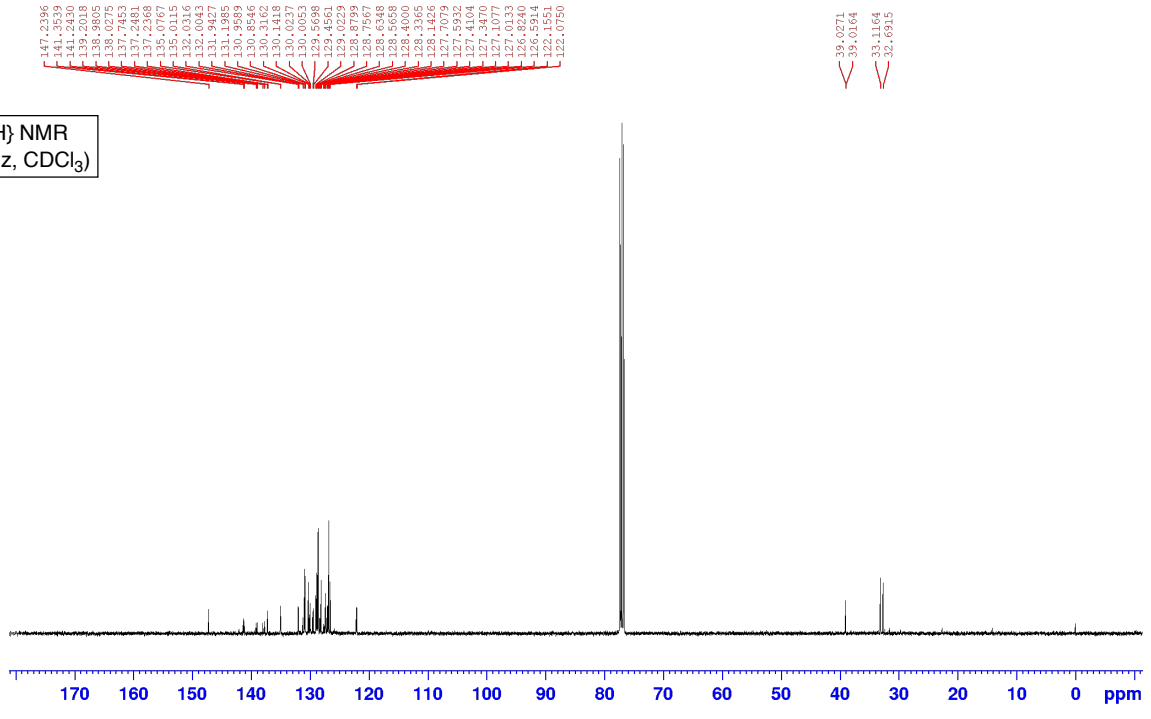

$^{31}\text{P}\{^1\text{H}\}$  NMR  
(162 MHz,  $\text{CDCl}_3$ )

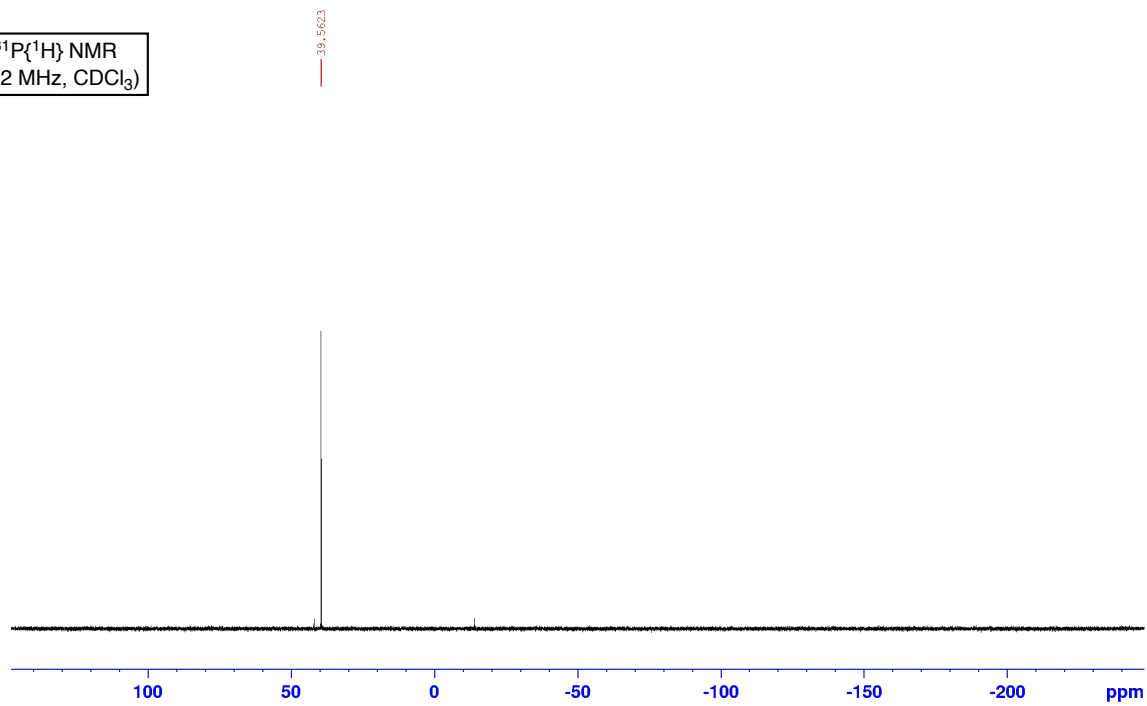

$^1\text{H}$ ,  $^{13}\text{C}\{^1\text{H}\}$ , and  $^{31}\text{P}\{^1\text{H}\}$  NMR Spectra of **3ha**

$^1\text{H}$  NMR  
(400 MHz,  $\text{CDCl}_3$ )

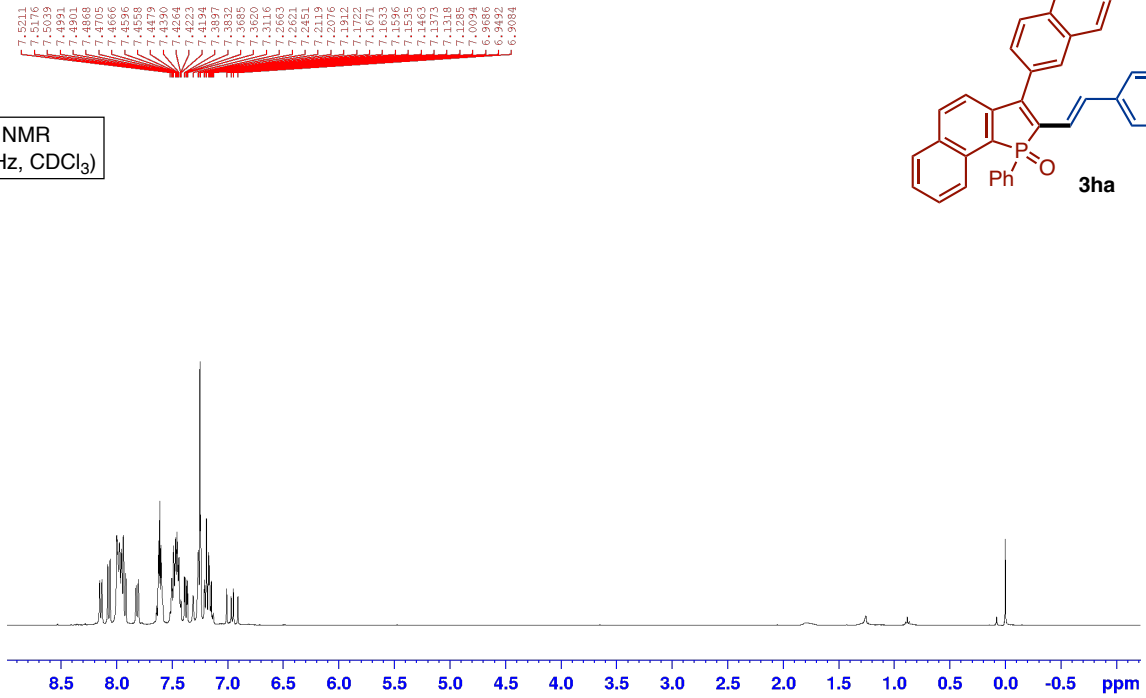

$^{13}\text{C}\{^1\text{H}\}$  NMR  
(100 MHz,  $\text{CDCl}_3$ )

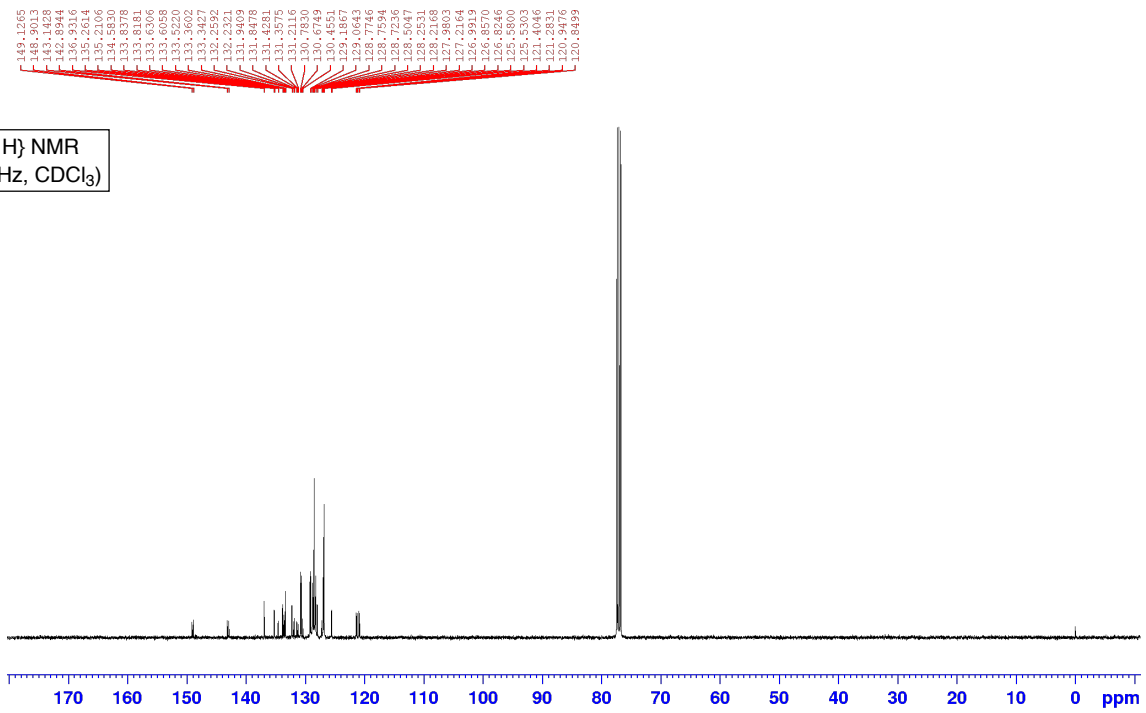

$^{31}\text{P}\{^1\text{H}\}$  NMR  
(162 MHz,  $\text{CDCl}_3$ )

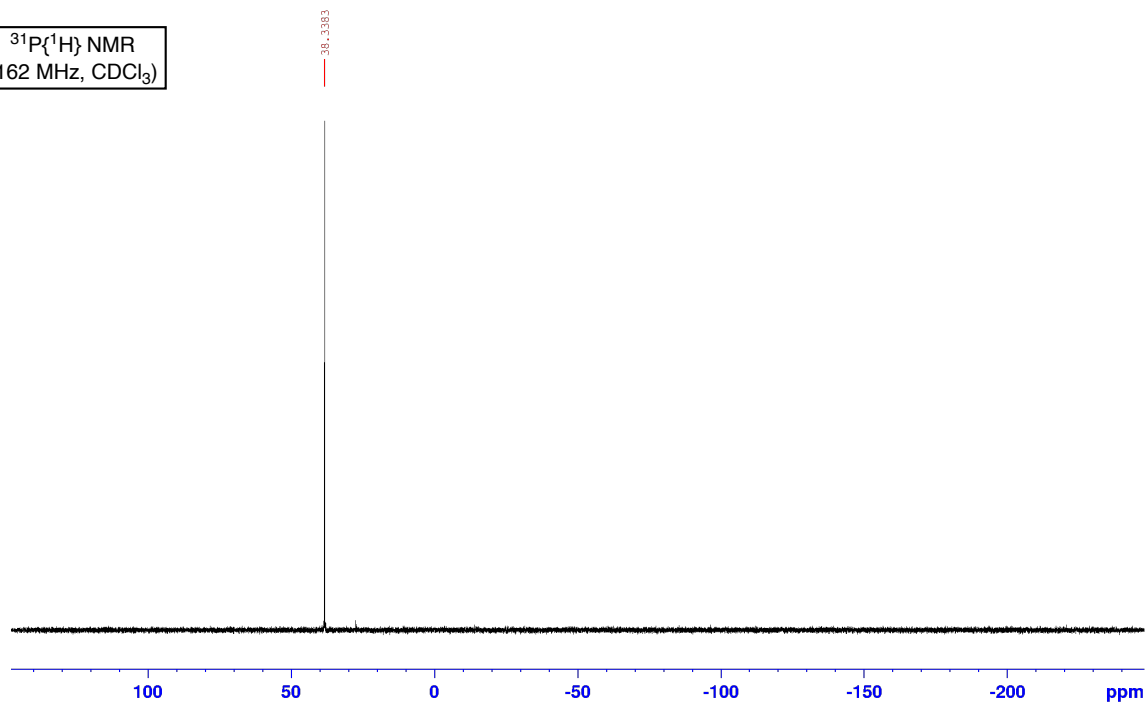



[<sup>1</sup>H, <sup>13</sup>C{<sup>1</sup>H}, and <sup>31</sup>P{<sup>1</sup>H} NMR Spectra of **3hm**]

7.8873  
7.8683  
7.8586  
7.8387  
7.8245  
7.8217  
7.8173  
7.8044  
7.8009  
7.5944  
7.5873  
7.5873  
7.5773  
7.5735  
7.5694  
7.5650  
7.5614  
7.4895  
7.4816  
7.4667  
7.4235  
7.4235  
7.4208  
7.3664  
7.3495  
7.3451  
7.3451  
7.1465  
7.0729  
6.9675  
6.9391  
6.9388  
6.8382

<sup>1</sup>H NMR  
(400 MHz, CDCl<sub>3</sub>)

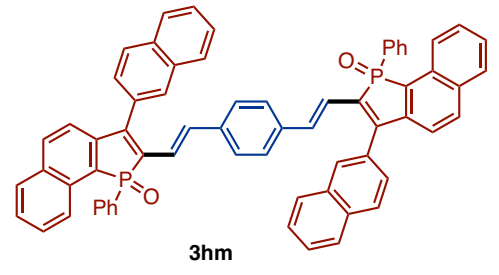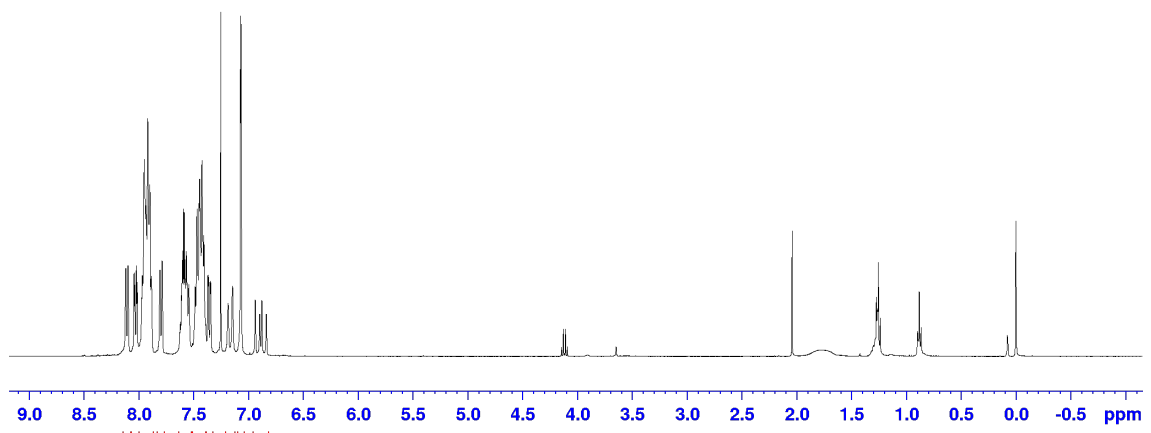

1.0953  
1.0939  
5.9015  
1.0237  
3.0596  
5.0392  
1.0806  
1.0052  
1.8710  
1.0000

148.9852  
143.1408  
136.8906  
136.8906  
134.5709  
134.5508  
134.4966  
133.8273  
133.6072  
133.5168  
133.3423  
132.2894  
132.2894  
131.9286  
131.8377  
131.3422  
131.2544  
130.7321  
130.6244  
130.3659  
129.1810  
128.7236  
128.7236  
128.5146  
128.3102  
127.9629  
127.9629  
127.2174  
126.9312  
126.8208  
125.5602  
125.5602  
125.5116  
121.4050  
121.2840  
121.2770  
121.1179

<sup>13</sup>C{<sup>1</sup>H} NMR  
(100 MHz, CDCl<sub>3</sub>)

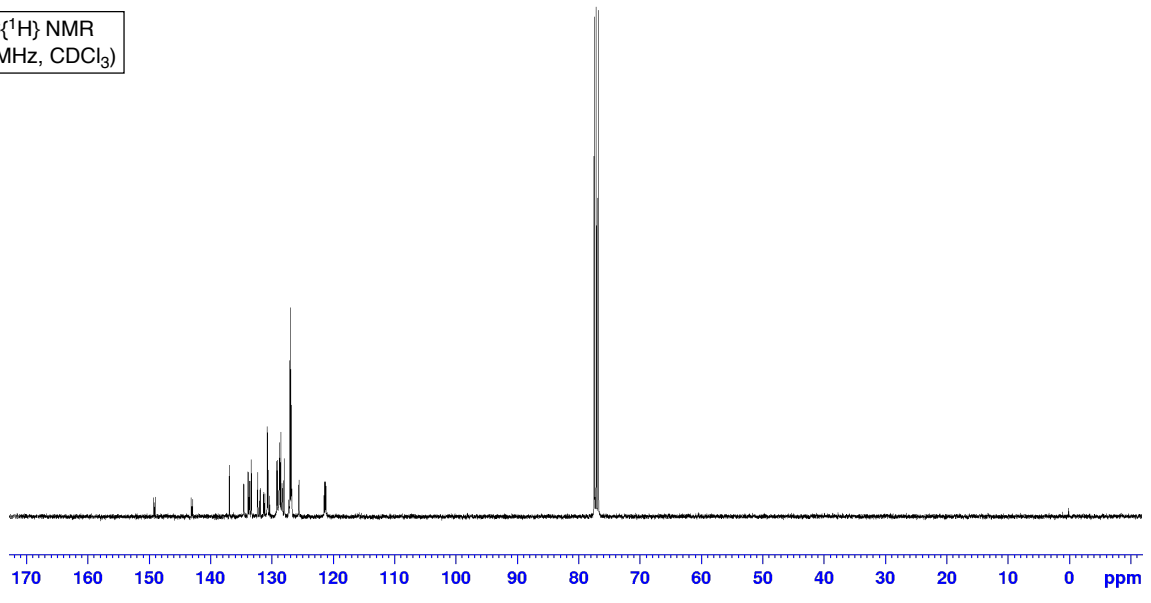

$^{31}\text{P}\{^1\text{H}\}$  NMR  
(162 MHz,  $\text{CDCl}_3$ )

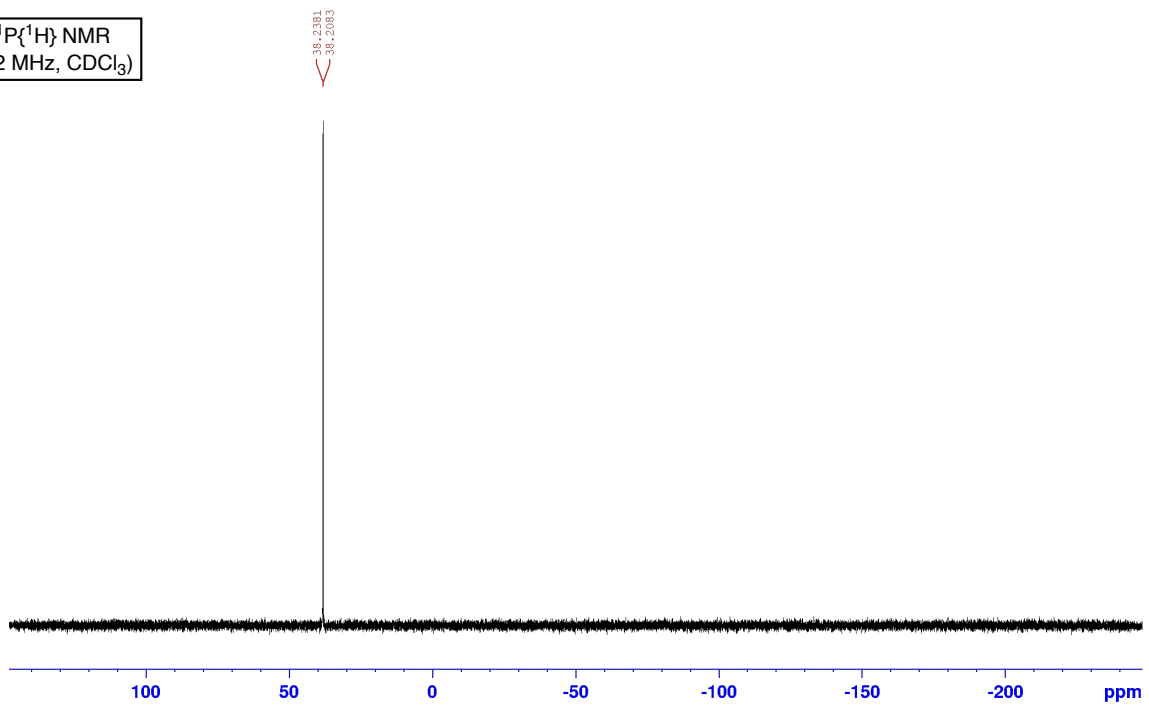

## References

(S1) S. Xu, K. Nishimura, K. Saito, K. Hirano and M. Miura, *Chem. Sci.*, doi: 10.1039/D2SC04311D.
